# Supplementary material for: Activation of NF-κB Protein Prevents the Transition from Juvenile Ovary to Testis and Promotes Ovarian Development in Zebrafish
Source: PubMed Central journal article supplement — J Biol Chem. 2012 Sep 17;287(45):37926–38. doi: 10.1074/jbc.M112.386284 (PMC3488064; doi:10.1074/jbc.m112.386284), 2012-09-17
Supplement: supp_M112.386284_jbc.M112.386284-1.pdf [file supp_M112.386284_jbc.M112.386284-1.pdf]

**Supplementary Table 1.** Quantitative PCR primer sequences used for the analysis of genes involved in zebrafish sex determination and apoptosis

| Gene Symbol        | Oligo   | Primer Sequence                | Annealing Temperature (°C) | Amplification product (bp) |
|--------------------|---------|--------------------------------|----------------------------|----------------------------|
| <i>ef1a</i>        | Forward | GTACTACTCTTCTTGATGCCC          | 60                         | 114                        |
|                    | Reverse | GTACAGTTCCAATACCTCCA           | 60                         |                            |
| <i>18S</i>         | Forward | GGAACGCTGAAAGAGAAATGAAATAACCCG | 60                         | 106                        |
|                    | Reverse | TCTCTTTGCCTAGTGGTGTGGCT        | 60                         |                            |
| <i>zp2</i>         | Forward | GAAATGCAGTCACTGTCCAG           | 60                         | 300                        |
|                    | Reverse | GAACCTCAAACCTGGCTGTCT          | 60                         |                            |
| <i>cyp19a1a</i>    | Forward | GGAGACATTGTGCGTGTCTGGA         | 60                         | 320                        |
|                    | Reverse | AGAATGTCCAGCTGTCCTTGAGCA       | 60                         |                            |
| <i>cyp11c1</i>     | Forward | TCCACTACCCATAGAAGCCAGCA        | 60                         | 362                        |
|                    | Reverse | TGCAGTGAGTTCCATAGAGTTGGC       | 60                         |                            |
| <i>wt1a</i>        | Forward | AATGGGTTCTGATGTTTCGTGACCTCA    | 60                         | 200                        |
|                    | Reverse | GGTCAGCTGTTCCCCAACTGG          | 60                         |                            |
| <i>sox9a</i>       | Forward | TCGGGTGCAGCACAAAGAAAGATCA      | 60                         | 263                        |
|                    | Reverse | CTTTGCCTGGCTGTGTGTCAAGTTT      | 60                         |                            |
| <i>amh</i>         | Forward | AAACAAAGTGGCCTCAAGGGTGTG       | 60                         | 390                        |
|                    | Reverse | TCATCGTACTGCTGCTATCCACCT       | 60                         |                            |
| <i>bc12</i>        | Forward | TCTTCGAGTTTGGTGGGACCATGT       | 60                         | 159                        |
|                    | Reverse | CGTACATCTCCACGAAGGCATCC        | 60                         |                            |
| <i>casp3a</i>      | Forward | ACTGGATCCTGGTGTGGAACTGA        | 60                         | 220                        |
|                    | Reverse | CCTGGTCATGATCTGCAAGAGC         | 60                         |                            |
| <i>casp8</i>       | Forward | GCTGATTTCCCTGATCGGAATGGC       | 60                         | 277                        |
|                    | Reverse | GTGTGTCCAGTCAATCCCTCAGC        | 60                         |                            |
| <i>dap3</i>        | Forward | AACGAGAAGGAGTTTGGGAGCTGT       | 60                         | 86                         |
|                    | Reverse | TTTCCTTCTTCAGACCGACTGCGT       | 60                         |                            |
| <i>pycard</i>      | Forward | ACGCGGTTTCTGTAACAGTGGAGA       | 60                         | 344                        |
|                    | Reverse | CAGCACATGTGATTGGGCCTG          | 60                         |                            |
| <i>tp53</i>        | Forward | AGTTAAGTGATGTGGTGCCTCGCCT      | 60                         | 115                        |
|                    | Reverse | ATCAGCTTCTTCCCTGTTTGGGC        | 60                         |                            |
| <i>p21</i>         | Forward | AGCGCAAACAGACCAACATCACAG       | 60                         | 150                        |
|                    | Reverse | ATGCAGCTCCAGACAGATGAAGGT       | 60                         |                            |
| <i>rela/ p65</i>   | Forward | AGCGCAGGATACACAGTTTCCAGA       | 60                         | 305                        |
|                    | Reverse | TCGACAGCTGCCGGAGTTTCTATT       | 60                         |                            |
| <i>nfkb1/ p50</i>  | Forward | AGTCAGCCTCAGATCCGTGTGTTT       | 60                         | 196                        |
|                    | Reverse | TTGTAAGCAAGGCCATCAACTGC        | 60                         |                            |
| <i>tnfa</i>        | Forward | TATGAAGCTTGAGAGTCGGGCGTT       | 60                         | 273                        |
|                    | Reverse | AAATGGATGGCAGCCTTGGAAGTG       | 60                         |                            |
| <i>il8</i>         | Forward | CAGGTGATCCGGGCATTCATGGT        | 60                         | 252                        |
|                    | Reverse | AATGAGCTTGAGAGGTCTGGCTGT       | 60                         |                            |
| <i>ptgs2a</i>      | Forward | CACTGTTGCCGGACAACTTTCAGA       | 60                         | 131                        |
|                    | Reverse | TCCAGCAGTCTGTTTGGTGAAGGA       | 60                         |                            |
| <i>bax</i>         | Forward | CGCCTCAACCCAATGAAAGAGGA        | 60                         | 101                        |
|                    | Reverse | ACAAGAAAGGGCACAGACTCTGGA       | 60                         |                            |
| <i>smac/Diablo</i> | Forward | CTGCCAAACGTTGCTCGATCCAAT       | 60                         | 217                        |
|                    | Reverse | TGAGTGTATGTAGTGCCCTTGGCGT      | 60                         |                            |
| <i>xiap</i>        | Forward | AGCTGGTTTCTACAGCACAGGTGA       | 60                         | 114                        |
|                    | Reverse | TAGTGTCTGGCATGTTCCCTCCAA       | 60                         |                            |

**Supplementary Table 2.** List of genes that were differentially expressed in the gonads of individuals treated with intermediate dose ( $5 \times 10^6$  CFU/ml) of heat-killed bacteria compared to expression in control females or males, respectively, based on microarray analysis.

| Section | Gene symbol | GenBank ID | Log2 fold change | q-value <sup>†</sup> |
|---------|-------------|------------|------------------|----------------------|
| A       | NA          | CO353534   | 1.012            | 7.34122E-05          |
|         | ddx3        | EV854707   | 1.061            | 0.000046736          |
|         | bactin2     | CO353568   | -0.803           | 0.227622922          |
|         | bactin2     | CO353568   | -0.618           | 0.30030883           |
|         | bactin2     | CO353568   | -0.616           | 0.559621554          |
|         | bactin2     | CO353568   | -0.615           | 0.477613018          |
|         | bactin2     | CO353568   | -0.583           | 0.521435994          |
|         | bactin2     | CO353568   | -0.801           | 0.119688655          |
|         | bactin2     | CO353568   | -0.736           | 0.195969442          |
|         | bactin2     | CO353568   | -0.571           | 0.383323778          |
|         | bactin2     | CO353568   | -0.668           | 0.318787487          |
|         | isg15       | CO349764   | 0.055            | 0.999867629          |
|         | nip7        | CO349808   | 0.294            | 0.773606448          |
|         | NA          | CO349863   | 0.541            | 0.294269812          |
|         | ccdc23      | CO349888   | 0.197            | 0.999867629          |
|         | gabarapl2   | CO349902   | -0.454           | 0.123783855          |
|         | bag4        | CO349994   | 0.479            | 0.14252651           |
|         | NA          | CO350074   | 0.247            | 0.763138748          |
|         | ugp2b       | CO350078   | 0.206            | 0.994231139          |
|         | c6orf115    | CO350157   | 0.305            | 0.866859743          |
|         | arcn1       | CO350176   | 0.723            | 0.016763326          |
|         | ube3c       | CO350268   | 0.266            | 0.828060885          |
|         | wu:fb54e10  | CO350338   | 0.596            | 0.202031874          |
|         | itm2cb      | CO350390   | 0.215            | 0.928440306          |
|         | fam98a      | CO350454   | 0.318            | 0.709698843          |
|         | faua        | CO350489   | -0.334           | 0.773606448          |
|         | eif2s1l     | CO350550   | 0.223            | 0.928440306          |
|         | zgc:77312   | CO350583   | 0.207            | 0.999625584          |
|         | zgc:162898  | CO350613   | 0.295            | 0.539675992          |
|         | tia1l       | CO350615   | 0.29             | 0.763632818          |
|         | NA          | CO350801   | 0.719            | 0.095659668          |
|         | LOC555504   | CO350807   | -0.241           | 0.991938187          |
|         | xbp1        | CO352662   | 0.495            | 0.371129828          |
|         | ppp1cb      | CO352706   | 0.228            | 0.895539927          |
|         | zgc:113196  | CO352716   | 0.629            | 0.119688655          |

|                  |          |        |             |
|------------------|----------|--------|-------------|
| zgc:111986       | CO352733 | -0.26  | 0.999867629 |
| uba3             | CO352940 | 0.016  | 0.999867629 |
| NA               | CO353005 | 0.97   | 0.195232443 |
| NA               | CO353057 | 0.645  | 0.201025037 |
| zgc:85789        | CO353187 | -0.189 | 0.999867629 |
| rps3a            | CO353189 | -0.206 | 0.999867629 |
| si:ch211-80h18.1 | CO353248 | -0.015 | 0.999867629 |
| atp5ib           | CO353399 | 0.124  | 0.999867629 |
| zgc:92655        | CO353393 | -0.267 | 0.9064934   |
| nrgna            | CO353446 | -0.284 | 0.999867629 |
| syf2             | CO353453 | 0.123  | 0.999867629 |
| gtf2h5           | CO353723 | 0.455  | 0.234026524 |
| nusap1           | CO353785 | 0.369  | 0.370538846 |
| si:dkeyp-104h9.5 | CO353817 | 0.215  | 0.828060885 |
| NA               | CO353836 | 0.552  | 0.175441628 |
| bccip            | CO353951 | -0.118 | 0.999867629 |
| ube2b            | CO354036 | -0.172 | 0.943103959 |
| zgc:103755       | CO354072 | 1.018  | 0.065812243 |
| rogdi            | CO350823 | 0.602  | 0.113582002 |
| im:6905231       | CO350828 | -0.522 | 0.234026524 |
| fbl              | CO350875 | 0.173  | 0.999867629 |
| NA               | CO350905 | 0.707  | 0.049268493 |
| eef1b2           | CO350919 | 0.117  | 0.999867629 |
| sfrs18           | CO350926 | 0.35   | 0.662693019 |
| rps20            | CO350944 | -0.431 | 0.488541985 |
| EIF6             | CO350999 | 0.546  | 0.684545685 |
| rbm4.3           | CO351040 | 0.076  | 0.999867629 |
| mrps18b          | CO351138 | -0.234 | 0.91869103  |
| smyd4            | CO351141 | -0.174 | 0.999867629 |
| LOC561325        | CO351211 | -0.343 | 0.859112036 |
| zgc:77702        | CO351265 | -0.343 | 0.896180358 |
| rpl23            | CO351432 | -0.269 | 0.823003105 |
| wu:fi12a09       | CO351437 | -0.075 | 0.999867629 |
| zgc:162293       | CO351504 | -0.462 | 0.350355675 |
| zgc:153225       | CO351626 | 0.314  | 0.376493828 |
| rpl21            | CO354254 | -0.219 | 0.945496623 |
| NA               | CO354269 | 0.163  | 0.999867629 |
| gabarapl2        | CO354298 | -0.507 | 0.583289316 |
| EIF3S2           | CO354335 | -0.098 | 0.999867629 |
| NA               | CO354349 | -0.14  | 0.999867629 |
| tbc1b            | CO354400 | -0.293 | 0.826191504 |
| cdk1             | CO354517 | -0.29  | 0.985862783 |
| im:7163520       | CO354538 | 0.201  | 0.915122715 |

|                    |          |        |             |
|--------------------|----------|--------|-------------|
| sec61b             | CO354618 | 0.478  | 0.216439437 |
| NA                 | CO354621 | 0.483  | 0.119688655 |
| NA                 | CO354669 | 0.412  | 0.371129828 |
| LOC100331743       | CO354721 | -0.413 | 0.994733513 |
| LOC100538148       | CO354802 | -0.08  | 0.999867629 |
| sycp3l             | CO354906 | -0.323 | 0.999867629 |
| stmn1b             | CO354907 | -0.381 | 0.945496623 |
| LOC100537292       | CO355091 | 0.086  | 0.999867629 |
| NA                 | CO355341 | -0.189 | 0.994231139 |
| pvalb6             | CO355539 | -0.12  | 0.999867629 |
| ppib               | CO355594 | -0.282 | 0.991938187 |
| cnppd1             | CO355679 | -0.111 | 0.999867629 |
| zgc:113106         | CO355686 | -0.091 | 0.999867629 |
| LOC100536982       | CO355700 | -0.195 | 0.886972868 |
| katnb1             | CO355741 | -0.191 | 0.999867629 |
| grn1               | CO355745 | -0.271 | 0.999867629 |
| rab36              | CO355763 | -0.047 | 0.999867629 |
| LOC559546          | CO355783 | -0.171 | 0.999867629 |
| NA                 | CO355808 | -0.411 | 0.826572396 |
| bambia             | CO355824 | -0.179 | 0.898523837 |
| zgc:162848         | CO355839 | -0.005 | 0.999867629 |
| dynll2b            | CO355854 | 0.413  | 0.370538846 |
| nek2               | CO355996 | 0.079  | 0.999867629 |
| pfn1               | CO356051 | -0.409 | 0.665661454 |
| LOC100536119       | CO356074 | -0.231 | 0.996300092 |
| ipo7               | CO356088 | 0.419  | 0.754337045 |
| ba1                | CO356089 | -0.715 | 0.991938187 |
| LOC100334539       | CO356090 | -0.689 | 0.994231139 |
| LOC559807          | CO356168 | -1.226 | 0.069572732 |
| si:ch211-214j24.10 | CO356393 | 0.488  | 0.353212317 |
| wu:fi28f11         | EV562803 | 0.45   | 0.973057654 |
| zgc:113255         | EV562804 | -0.526 | 0.943103959 |
| ints9              | EV562811 | -0.782 | 0.125658247 |
| lim2.2             | EV562846 | -0.393 | 0.828060885 |
| NA                 | EV562860 | -0.203 | 0.999867629 |
| LOC100331949       | EV562883 | -0.407 | 0.999867629 |
| mmp14b             | EV562897 | -0.226 | 0.999867629 |
| NA                 | EV563328 | 0.242  | 0.999867629 |
| wu:fa16f04         | EV563570 | 0.379  | 0.531103056 |
| LOC100332260       | EV563651 | -0.209 | 0.999867629 |
| zgc:165531         | EV563688 | 0.269  | 0.820424332 |
| msnb               | EV563857 | 0.983  | 0.067887154 |
| LOC569091          | EV563872 | 0.492  | 0.318787487 |

|                   |          |        |             |
|-------------------|----------|--------|-------------|
| zgc:63850         | EV564375 | -0.362 | 0.763138748 |
| rnasen            | EV564723 | 0.142  | 0.999867629 |
| wu:fi16e04        | EV565011 | 0.086  | 0.999867629 |
| rims2a            | EV565070 | -0.209 | 0.999867629 |
| si:ch211-233f10.4 | EV565164 | -0.155 | 0.999867629 |
| g2e3              | EV854572 | 0.355  | 0.532523299 |
| LOC564521         | CO353283 | 0.081  | 0.999867629 |
| polr3glb          | CO353303 | -0.256 | 0.994231139 |
| mcm5              | CO354454 | 0.259  | 0.842886652 |
| psme1             | CO354571 | -0.252 | 0.994231139 |
| bactin2           | CO353568 | -0.512 | 0.646542916 |
| zgc:110091        | EV555386 | -0.427 | 0.614878955 |
| emd               | EV555455 | -0.194 | 0.999867629 |
| hagh              | EV555506 | -0.038 | 0.999867629 |
| NA                | EV555557 | 0.477  | 0.521435994 |
| NA                | EV555579 | 0.634  | 0.119688655 |
| si:dkey-251i10.2  | EV606513 | -0.039 | 0.999867629 |
| LOC100537190      | EV555834 | -0.259 | 0.999867629 |
| fam175a           | EV556002 | 0.287  | 0.686651365 |
| NA                | EV556136 | 0.498  | 0.47999527  |
| eif3d             | EV556215 | -0.189 | 0.999867629 |
| zgc:110155        | EV556712 | -0.251 | 0.828060885 |
| ptgds             | EV556934 | -1.498 | 0.245417124 |
| syncrip           | EV557038 | -0.204 | 0.96972248  |
| NA                | EV557082 | 0.542  | 0.094304931 |
| zgc:63863         | EV557121 | 0.237  | 0.902634316 |
| NA                | EV557123 | 0.72   | 0.149553898 |
| LOC100334363      | EV557473 | -0.345 | 0.999867629 |
| LOC100536996      | EV557501 | -0.135 | 0.999867629 |
| NA                | EV557597 | 0.148  | 0.994733513 |
| NA                | EV557759 | -0.22  | 0.994231139 |
| NA                | EV557769 | 0.365  | 0.787139253 |
| med10             | EV557895 | -0.331 | 0.747423295 |
| zgc:194423        | EV557941 | 0.651  | 0.416004256 |
| unc119b           | EV558240 | 0.429  | 0.48064577  |
| zmynd19           | EV558420 | 0.718  | 0.094304931 |
| zgc:77713         | EV558604 | 0.426  | 0.228031921 |
| tomm40            | EV558612 | 0.231  | 0.903368465 |
| slbp              | EV558724 | 0.473  | 0.223508786 |
| gtpbp1            | EV558877 | 0.243  | 0.665661454 |
| LOC100334939      | EV558936 | 0.418  | 0.545196011 |
| zgc:56518         | EV559539 | -0.474 | 0.522725157 |
| plk3              | EV559586 | 0.06   | 0.999867629 |

|                  |          |        |             |
|------------------|----------|--------|-------------|
| zgc:56596        | EV559762 | 0.27   | 0.743654556 |
| surf6            | EV559992 | 0.306  | 0.773606448 |
| LOC100535535     | EV560026 | 0.221  | 0.999867629 |
| nucks1a          | EV560187 | 0.164  | 0.999867629 |
| bactin2          | CO353568 | -0.307 | 0.743654556 |
| mrps18c          | EV560717 | 0.056  | 0.999867629 |
| zgc:103571       | EV560964 | 0.187  | 0.999867629 |
| tmem110          | EV560994 | 0.099  | 0.999867629 |
| f11r             | EV561119 | 0.195  | 0.99124371  |
| wu:fc41e03       | EV561339 | 0.151  | 0.999867629 |
| syt13            | EV561438 | 0.214  | 0.984288193 |
| tradd            | EV561633 | 0.06   | 0.999867629 |
| NA               | EV603419 | -0.297 | 0.945496623 |
| znf259           | EV606517 | 0.243  | 0.92790543  |
| ccdc69           | EV603654 | 0.363  | 0.89076927  |
| NA               | EV603821 | 0.852  | 0.085352772 |
| LOC100537670     | EV854389 | -0.331 | 0.999867629 |
| NA               | EV604281 | 0.231  | 0.991938187 |
| cenpn            | EV604290 | 0.337  | 0.502501247 |
| nr1h4            | EV604398 | -0.132 | 0.999867629 |
| LOC100535704     | EV604571 | 0.362  | 0.526063265 |
| zgc:85936        | EV604628 | 0.037  | 0.999867629 |
| zgc:110251       | EV604634 | 1.113  | 0.588775669 |
| zgc:66323        | EV604952 | -0.243 | 0.999867629 |
| cct2             | EV605329 | -0.71  | 0.196319585 |
| aatf             | EV605639 | 0.38   | 0.360126921 |
| <b>C</b>         |          |        |             |
| esr2b            | BC086848 | 0.264  | 0.999867629 |
| psen2            | BC065382 | -0.36  | 0.886972868 |
| med7             | CO349753 | -0.318 | 0.521435994 |
| rae1             | CO349827 | 0.367  | 0.991938187 |
| wasf3            | CO349919 | -0.18  | 0.999867629 |
| ppp2r2a          | CO349991 | 0.23   | 0.996300092 |
| ptmab            | CO350017 | 0.9    | 0.614878955 |
| esr1             | CO350018 | 0.603  | 0.119688655 |
| hsd17b12b        | CO350063 | 0.202  | 0.991938187 |
| si:dkey-127k13.2 | CO350097 | -0.947 | 0.015760916 |
| LOC100001845     | CO350158 | -0.433 | 0.23463341  |
| daxx             | CO350213 | -0.091 | 0.999867629 |
| si:dkey-22a1.2   | CO350266 | -0.325 | 0.996300092 |
| zgc:113944       | CO350480 | 0.488  | 0.504946116 |
| fabp10a          | CO350530 | 0.577  | 0.999867629 |
| NA               | CO350580 | 0.281  | 0.63319393  |
| LOC100331957     | CO350661 | -0.601 | 0.195969442 |

|                 |          |        |             |
|-----------------|----------|--------|-------------|
| psmb6           | CO352692 | -0.282 | 0.96972248  |
| NA              | CO352697 | 0.367  | 0.928440306 |
| uap1            | CO352786 | 0.148  | 0.999867629 |
| lasp1           | CO352888 | 0.225  | 0.991938187 |
| NA              | CO352935 | 0.328  | 0.763138748 |
| zgc:73262       | CO353046 | 0.213  | 0.999867629 |
| atg5            | CO353054 | 0.064  | 0.999867629 |
| NA              | CO353055 | 0.423  | 0.421971344 |
| cpne1           | CO353097 | 0.341  | 0.709698843 |
| cox6a1          | CO353202 | -0.18  | 0.999867629 |
| zgc:153665      | CO353228 | -0.307 | 0.999867629 |
| ube2h           | CO353231 | -0.218 | 0.991938187 |
| pfkfb4l         | CO353264 | 0.804  | 0.007860118 |
| LOC793688       | CO353414 | 0.419  | 0.376493828 |
| NA              | CO353365 | 0.081  | 0.999867629 |
| srsf1a          | CO353437 | 0.062  | 0.999867629 |
| NA              | CO353468 | 0.428  | 0.285409963 |
| NA              | CO353497 | 0.34   | 0.828060885 |
| atf4b2          | CO353498 | 0.406  | 0.519586572 |
| npc2            | CO353554 | -0.299 | 0.636856309 |
| odf3b           | CO353557 | -0.848 | 0.234026524 |
| idh1            | CO353699 | 0.173  | 0.999867629 |
| asah1b          | CO353701 | 0.027  | 0.999867629 |
| cstb *          | CO353751 | -0.182 | 0.999867629 |
| NA              | CO353767 | 0.548  | 0.123783855 |
| LOC100534835    | CO353892 | -0.253 | 0.813455656 |
| LOC100536788    | CO353912 | 1.093  | 0.773606448 |
| comtb           | CO354089 | 0.368  | 0.625093389 |
| NA              | CO354096 | 0.215  | 0.896064831 |
| spdya           | CO354101 | -0.082 | 0.999867629 |
| maptb           | CO350876 | 0.435  | 0.999867629 |
| NA              | CO350882 | 0.444  | 0.509226983 |
| pttg1ipb        | CO350884 | -0.322 | 0.743654556 |
| zgc:77739       | CO350920 | -0.276 | 0.371129828 |
| zgc:110697      | CO351015 | -0.429 | 0.216439437 |
| si:dkey-13i19.8 | CO351027 | -0.162 | 0.999867629 |
| NA              | CO351041 | 0.154  | 0.999867629 |
| LOC100535411    | CO351056 | -0.108 | 0.999867629 |
| LOC100005742    | CO351062 | -0.301 | 0.905934999 |
| gng7            | CO351154 | 0.079  | 0.999867629 |
| zgc:110759      | CO351438 | 0.131  | 0.999867629 |
| btr04           | CO351572 | -0.379 | 0.370538846 |
| aanat1          | CO351588 | -0.479 | 0.763138748 |

|                  |          |        |             |
|------------------|----------|--------|-------------|
| si:dkeyp-94h10.5 | CO351603 | -0.281 | 0.455280153 |
| klf11a           | CO351610 | 0.195  | 0.999867629 |
| si:dkey-181i3.3  | CO351640 | 0.714  | 0.199755575 |
| LOC100535480     | CO354229 | 0.304  | 0.999867629 |
| ruvbl1           | CO354286 | -0.302 | 0.48064577  |
| zgc:73328        | CO354333 | -0.252 | 0.92790543  |
| zgc:73380        | CO354601 | -0.287 | 0.795256395 |
| strn3            | CO354619 | 0.593  | 0.038384219 |
| neu3.3           | CO354692 | 0.843  | 0.030077935 |
| zgc:194319       | CO354694 | -0.159 | 0.999867629 |
| NA               | CO354891 | 0.031  | 0.999867629 |
| zgc:101024       | CO355029 | -0.293 | 0.872516471 |
| nrarpb           | CO355193 | -0.478 | 0.137854395 |
| zgc:110256       | CO355211 | -0.301 | 0.87805354  |
| NA               | CO355213 | 0.15   | 0.999867629 |
| LOC100536036     | CO355313 | 0.551  | 0.259613471 |
| zgc:136911       | CO355482 | 0.164  | 0.99124371  |
| pa2g4b           | CO355706 | 0.225  | 0.909342474 |
| tomm40l          | CO355967 | 0.374  | 0.885547771 |
| zgc:158667       | CO355973 | 0.089  | 0.999867629 |
| NA               | CO356298 | 0.513  | 0.184157163 |
| sgk1             | CO356437 | 0.308  | 0.949853545 |
| NA               | EV854692 | -0.187 | 0.999867629 |
| rpp40l           | EV562735 | -0.191 | 0.945496623 |
| lcn15            | EV562749 | 0.413  | 0.896180358 |
| manba            | EV563168 | -0.063 | 0.999867629 |
| EIF3S10          | EV563259 | 0.312  | 0.648078121 |
| UBE2V2           | EV563370 | 0.357  | 0.539942713 |
| P4HA2            | EV563383 | 0.098  | 0.999867629 |
| TMEM170A         | EV563404 | 0.311  | 0.902634316 |
| MPHOSPH8         | EV563477 | 0.426  | 0.686651365 |
| NA               | EV563672 | 0.162  | 0.999867629 |
| ASF1BB           | EV563738 | 0.264  | 0.999867629 |
| TRIM44           | EV563917 | 0.66   | 0.318787487 |
| LOC100536655     | EV563943 | 0.246  | 0.742467699 |
| SERPINA10A       | EV563949 | 0.146  | 0.999867629 |
| UNG              | EV564005 | -0.267 | 0.896180358 |
| ARHGDI3          | EV564089 | 0.886  | 0.045823299 |
| NA               | EV564341 | 0.728  | 0.137854395 |
| ZDHHC13          | EV564347 | 0.337  | 0.91869103  |
| NCAPD2           | EV564485 | 0.389  | 0.199755575 |
| zgc:165631       | EV564487 | 0.767  | 0.178467036 |
| AKIRIN1          | EV564511 | 0.425  | 0.318787487 |



|                |          |        |             |
|----------------|----------|--------|-------------|
| rbm24b         | EV564535 | 0.228  | 0.981789129 |
| LOC100535442   | EV564791 | 0.319  | 0.844078777 |
| hif1al         | EV564796 | 0.307  | 0.830652974 |
| zgc:86764      | EV564889 | -0.075 | 0.999867629 |
| LOC100536419   | EV564893 | -0.475 | 0.418740661 |
| LOC100535373   | EV564927 | 0.559  | 0.092741402 |
| LOC100330256   | EV564965 | -0.555 | 0.410198141 |
| NA             | EV565055 | 0.377  | 0.467651032 |
| zgc:153409     | CO351716 | 0.665  | 0.915413325 |
| LOC100535183   | CO351755 | 0.414  | 0.773606448 |
| zgc:111976     | EV854602 | -0.588 | 0.199807342 |
| zgc:136458     | EV555253 | 0.235  | 0.791812584 |
| zgc:136826     | EV555298 | 0.089  | 0.999867629 |
| capza1b        | EV555311 | 0.277  | 0.581991764 |
| rbx1           | EV555628 | -0.515 | 0.195969442 |
| NA             | EV555727 | 0.134  | 0.999867629 |
| zgc:158228     | EV555883 | -0.099 | 0.999867629 |
| cyp46a2        | EV555924 | 0.143  | 0.999867629 |
| tsr2           | EV555967 | -0.133 | 0.999867629 |
| tmem93         | EV556134 | -0.332 | 0.559621554 |
| phgdh          | EV556195 | -0.286 | 0.5837736   |
| wu:fj05h12     | EV556305 | 0.226  | 0.999867629 |
| med4           | EV556635 | -0.57  | 0.999867629 |
| treh           | EV556637 | -0.236 | 0.999867629 |
| dhrs13         | EV556745 | -0.683 | 0.094304931 |
| LOC100333807   | EV556837 | -0.336 | 0.773606448 |
| LOC100534896   | EV556859 | -0.074 | 0.999867629 |
| si:dkeyp-2e4.5 | EV556979 | -0.098 | 0.999867629 |
| zgc:158257     | EV557089 | -0.127 | 0.999867629 |
| NA             | EV557104 | 0.171  | 0.999867629 |
| NA             | EV557151 | 0.169  | 0.999867629 |
| im:7137597     | EV557365 | -0.182 | 0.999867629 |
| rbbp6          | EV557446 | 0.167  | 0.991938187 |
| tuba2          | EV557535 | 0.281  | 0.9849946   |
| LOC100538042   | EV557647 | 0.125  | 0.999867629 |
| zswim7         | EV558019 | -0.199 | 0.999867629 |
| ddx6           | EV558091 | -0.211 | 0.999867629 |
| tbp12          | EV558452 | -0.149 | 0.999867629 |
| NA             | EV558530 | 0.23   | 0.999867629 |
| zgc:92184      | EV558751 | -0.32  | 0.754337045 |
| nup43          | EV558854 | -0.277 | 0.796008859 |
| tmem183a       | EV558899 | -0.443 | 0.708947213 |
| trdmt1         | EV558944 | -0.211 | 0.863522341 |

|                  |          |        |             |
|------------------|----------|--------|-------------|
| zgc:171667       | EV559033 | -0.203 | 0.999867629 |
| LOC563794        | EV559064 | 0.499  | 0.213108124 |
| ppapdc1b         | EV559127 | -0.302 | 0.733550375 |
| acadm            | EV559206 | 0.059  | 0.999867629 |
| psmc3ip          | EV559315 | -0.3   | 0.701081195 |
| seh1l            | EV559482 | -0.204 | 0.991938187 |
| tfdp1b           | EV559695 | -0.295 | 0.708947213 |
| bxdc2            | EV559829 | -0.076 | 0.999867629 |
| LOC407698        | EV559885 | -0.114 | 0.999867629 |
| usp10            | EV560041 | -0.04  | 0.999867629 |
| si:ch211-59d15.9 | EV560155 | -0.252 | 0.896180358 |
| GCH1 *           | EV560170 | 0.267  | 0.999867629 |
| zgc:101851       | EV560211 | -0.14  | 0.999867629 |
| chmp4c           | EV560271 | -0.215 | 0.991938187 |
| nop16            | EV560273 | -0.21  | 0.999867629 |
| wu:fc76b11       | EV560351 | -0.305 | 0.722606681 |
| zgc:92177        | EV560405 | -0.07  | 0.999867629 |
| tdp2b            | EV560482 | -0.455 | 0.371129828 |
| golt1b           | EV560565 | -0.213 | 0.880640891 |
| trip13           | EV560777 | -0.113 | 0.999867629 |
| si:dkeyp-12a9.5  | EV560888 | -0.406 | 0.318787487 |
| exosc8           | EV561004 | -0.217 | 0.96972248  |
| pcid2            | EV561076 | -0.422 | 0.521435994 |
| eed              | EV561141 | -0.363 | 0.700074239 |
| spint1b          | EV561444 | -0.085 | 0.999867629 |
| mapre1l          | EV603135 | -0.154 | 0.999867629 |
| timmm9           | EV603305 | -0.268 | 0.819093821 |
| zgc:103481       | EV603561 | -0.811 | 0.556288491 |
| zgc:153393       | EV603577 | -0.453 | 0.376493828 |
| zgc:56688        | EV603894 | -0.684 | 0.135239431 |
| si:zfos-47c12.1  | EV854378 | -0.571 | 0.045657423 |
| srsf5a           | EV854387 | 0.375  | 0.48064577  |
| b3gat3           | EV604195 | 0.25   | 0.99124371  |
| si:dkey-265a7.2  | EV604486 | -0.213 | 0.82903751  |
| sec62            | EV604676 | 0.448  | 0.588675638 |
| selm             | EV604727 | -0.089 | 0.999867629 |
| abhd10b          | EV604771 | -0.232 | 0.763138748 |
| mbnl2            | EV604872 | 0.107  | 0.999867629 |
| irf5             | EV605104 | -0.143 | 0.999867629 |
| polr3c           | EV605163 | -0.122 | 0.999867629 |
| LOC566020        | EV605263 | -0.561 | 0.175441628 |
| cratb            | EV605332 | -0.094 | 0.999867629 |
| otul             | EV605370 | -0.276 | 0.795256395 |

|          |                   |          |        |             |
|----------|-------------------|----------|--------|-------------|
|          | si:ch211-234f14.1 | EV605455 | 0.094  | 0.999867629 |
|          | nudcd1            | EV605685 | -0.152 | 0.991938187 |
|          | LOC555985         | EV605902 | -0.477 | 0.19084081  |
|          | si:ch211-14a17.6  | EV605918 | -0.451 | 0.318787487 |
|          | zgc:85657         | EV605984 | -0.453 | 0.153383361 |
|          | fen1              | EV606002 | -0.374 | 0.545196011 |
|          | mapk3             | EV606200 | -0.227 | 0.994231139 |
|          | hars2             | EV606228 | -0.249 | 0.816937804 |
| <b>D</b> | si:dkey-251i10.1  | CO352897 | 1.161  | 0.015760916 |
|          | si:dkey-181i3.3   | CO353459 | 1.053  | 0.016763326 |
|          | cygb1             | EV854745 | 1.146  | 0.015709686 |
|          | NA                | EV563315 | 1.679  | 0.007860118 |
|          | si:dkey-181i3.3   | EV854558 | 1.076  | 0.015760916 |
|          | NA                | EV556845 | 1.11   | 0.015760916 |
|          | si:ch211-216l23.1 | EV604714 | 1.078  | 0.007860118 |
| <b>E</b> | chd               | EV563263 | 1.949  | 0.049268493 |
| <b>F</b> | ff1b              | AF198086 | -0.11  | 0.999867629 |
|          | zp2               | AF331968 | -0.458 | 0.994231139 |
|          | ff1b              | AF198086 | -0.102 | 0.999867629 |
|          | tbp               | BC055549 | -0.155 | 0.999867629 |
|          | zp2               | AF331968 | -0.303 | 0.999867629 |
|          | bactin2           | CO353568 | -1.014 | 0.119503214 |
|          | si:rp71-56i13.6   | CO349714 | -0.08  | 0.999867629 |
|          | guf1              | CO349715 | 0.166  | 0.991938187 |
|          | im:6902407        | CO349727 | -0.237 | 0.999867629 |
|          | zgc:100861        | CO349728 | -0.18  | 0.991938187 |
|          | cisd2             | CO349730 | -0.003 | 0.999867629 |
|          | slc16a3           | CO349732 | 0.586  | 0.247889968 |
|          | abhd4             | CO349741 | 0.047  | 0.999867629 |
|          | snrpc             | CO349742 | -0.044 | 0.999867629 |
|          | NA                | CO349743 | 0.207  | 0.999867629 |
|          | LOC100535211      | CO349744 | -0.227 | 0.999867629 |
|          | rdh14a            | CO349746 | -0.404 | 0.991938187 |
|          | si:dkey-44g23.5   | CO349747 | 0.639  | 0.094304931 |
|          | myef2             | CO349749 | 0.313  | 0.896180358 |
|          | LOC100535602      | CO349751 | 0.213  | 0.999867629 |
|          | ywhaqa            | CO349757 | 0.215  | 0.984719777 |
|          | si:dkey-44g23.5   | CO349763 | -0.262 | 0.985862783 |
|          | zgc:112142        | CO349767 | -0.216 | 0.999867629 |
|          | fth1a             | CO349769 | 0.107  | 0.999867629 |
|          | NA                | CO349772 | 0.856  | 0.235191638 |
|          | NA                | CO349774 | 0.599  | 0.816937804 |

|                   |          |        |             |
|-------------------|----------|--------|-------------|
| NA                | CO349791 | -0.17  | 0.999867629 |
| zgc:114188        | CO349795 | -0.348 | 0.991938187 |
| zgc:109888        | CO349796 | -0.257 | 0.999867629 |
| tspan13a          | CO349798 | 0.017  | 0.999867629 |
| gtf3ab            | CO349799 | 0.293  | 0.999867629 |
| itgb5             | CO349825 | 0.579  | 0.278789993 |
| pitx2             | CO349830 | 0.147  | 0.999867629 |
| zgc:92869         | CO349835 | -0.29  | 0.999867629 |
| rpl14             | CO349836 | -0.309 | 0.915413325 |
| si:dkey-208k4.2   | CO349838 | 0.424  | 0.999867629 |
| h3f3a             | CO349846 | 0.237  | 0.905640889 |
| LOC100331830      | CO349851 | 0.061  | 0.999867629 |
| acp5a             | CO349852 | 0.009  | 0.999867629 |
| zgc:152652        | CO349853 | -0.193 | 0.999867629 |
| zgc:56388         | CO349862 | -0.019 | 0.999867629 |
| wu:fi38e01        | CO349865 | -0.224 | 0.999867629 |
| zgc:56699         | CO349866 | -0.023 | 0.999867629 |
| hsd3b7            | CO349867 | 0.131  | 0.999867629 |
| LOC100535118      | CO349868 | 0.279  | 0.999867629 |
| ctssb.1           | CO349869 | -0.009 | 0.999867629 |
| pdia4             | CO349871 | 0.341  | 0.521435994 |
| si:ch211-210c8.7  | CO349873 | -0.096 | 0.999867629 |
| hmgb1a            | CO349874 | -0.866 | 0.54132807  |
| zp211             | CO349878 | -0.078 | 0.999867629 |
| glulb             | CO349883 | -0.057 | 0.999867629 |
| NA                | CO349895 | 0.15   | 0.999867629 |
| tacc3             | CO349903 | 0.227  | 0.999867629 |
| suclg1            | CO349907 | 0.039  | 0.999867629 |
| zp2.5             | CO349910 | -0.197 | 0.999867629 |
| LOC100331917      | CO349911 | -0.05  | 0.999867629 |
| NA                | CO349912 | -0.098 | 0.999867629 |
| LOC100535162      | CO349920 | 0.031  | 0.999867629 |
| ppp1r14aa         | CO349921 | 0.024  | 0.999867629 |
| rpl36             | CO349922 | 0.04   | 0.999867629 |
| si:ch211-234p6.13 | CO349923 | -0.106 | 0.999867629 |
| snrpb             | CO349925 | 0.091  | 0.999867629 |
| gdi1              | CO349928 | 0.064  | 0.999867629 |
| zgc:73293         | CO349932 | -0.064 | 0.999867629 |
| birc5b            | CO349939 | -0.143 | 0.999867629 |
| LOC100536898      | CO349940 | -0.012 | 0.999867629 |
| nccrp1            | CO349941 | 0.145  | 0.999867629 |
| si:ch73-86n6.2    | CO349942 | 0.147  | 0.999867629 |
| mbp               | CO349946 | 0.23   | 0.999867629 |

|                   |          |        |             |
|-------------------|----------|--------|-------------|
| LOC100534666      | CO349954 | -0.192 | 0.965513812 |
| btg4              | CO349959 | -0.005 | 0.999867629 |
| wu:fd16e03        | CO349964 | 0.175  | 0.991938187 |
| c1orf109          | CO349967 | -0.118 | 0.999867629 |
| aurkaip1          | CO349970 | -0.044 | 0.999867629 |
| tpm3              | CO349972 | 0.307  | 0.350215418 |
| vtg2              | CO349976 | -0.007 | 0.999867629 |
| zgc:92041         | CO349978 | -0.171 | 0.999867629 |
| NA                | CO349981 | 0.181  | 0.999867629 |
| spsc3             | CO349983 | -0.219 | 0.999867629 |
| dldh              | CO349985 | 0.247  | 0.999867629 |
| NA                | CO349989 | 0.136  | 0.999867629 |
| zgc:92018         | CO349992 | -0.083 | 0.999867629 |
| si:ch73-90k17.1   | CO349995 | 0.388  | 0.686651365 |
| NA                | CO350003 | -0.184 | 0.999867629 |
| zgc:162969        | CO350009 | 0.143  | 0.999867629 |
| c10orf11          | CO350012 | -0.15  | 0.999867629 |
| usp5              | CO350014 | -0.013 | 0.999867629 |
| si:ch211-145c1.1  | CO350015 | 0.023  | 0.999867629 |
| si:dkey-58f10.14  | CO350023 | -0.14  | 0.999867629 |
| rpl12             | CO350026 | -0.046 | 0.999867629 |
| si:ch211-150o23.2 | CO350033 | -0.005 | 0.999867629 |
| si:ch211-125e6.13 | CO350034 | 0.085  | 0.999867629 |
| si:ch73-189n23.1  | CO350036 | 0.289  | 0.999867629 |
| lrrc57            | CO350037 | 0.174  | 0.999867629 |
| sumo3b            | CO350045 | -0.111 | 0.999867629 |
| hmg20b            | CO350054 | 0.169  | 0.999867629 |
| socs3a            | CO350055 | -0.285 | 0.999867629 |
| hdgfrp2           | CO350056 | 0.066  | 0.999867629 |
| EIF2S2            | CO350068 | 0.023  | 0.999867629 |
| LOC100535939      | CO350072 | 0.114  | 0.999867629 |
| zgc:110113        | CO350075 | -0.222 | 0.999867629 |
| orc6              | CO350077 | 0.139  | 0.999867629 |
| LOC100537182      | CO350080 | -0.232 | 0.999867629 |
| atp5o             | CO350081 | -0.003 | 0.999867629 |
| zgc:152952        | CO350084 | 0.94   | 0.762908825 |
| oep               | CO350088 | 0.372  | 0.370538846 |
| LOC793710         | CO350092 | 0.242  | 0.999867629 |
| LOC100333071      | CO350099 | -0.001 | 0.999867629 |
| rbpms2            | CO350100 | 0.227  | 0.999867629 |
| zgc:112980        | CO350103 | 0.271  | 0.971050896 |
| zgc:171818        | CO350113 | 0.037  | 0.999867629 |
| dir2              | CO350118 | -0.152 | 0.999867629 |

|                  |          |        |             |
|------------------|----------|--------|-------------|
| denr             | CO350119 | 0.122  | 0.999867629 |
| lsm1             | CO350123 | 0.187  | 0.999867629 |
| cdc20            | CO350129 | -0.028 | 0.999867629 |
| dad1             | CO350136 | 0.184  | 0.999867629 |
| si:dkey-180p18.9 | CO350145 | 0.318  | 0.623518362 |
| timm8b           | CO350146 | 0.131  | 0.999867629 |
| gpm6aa           | CO350152 | 0.273  | 0.994733513 |
| bzw1a            | CO350155 | 0.467  | 0.338478679 |
| ube2a            | CO350164 | -0.101 | 0.999867629 |
| rmf111           | CO350167 | -0.056 | 0.999867629 |
| NA               | CO350177 | 0.003  | 0.999867629 |
| zgc:92242        | CO350182 | -0.006 | 0.999867629 |
| zgc:171717       | CO350186 | 0.102  | 0.999867629 |
| aplP             | CO350199 | 0.392  | 0.999867629 |
| zgc:92707        | CO350202 | 0.154  | 0.999867629 |
| LOC407678        | CO350203 | -0.461 | 0.778198408 |
| zgc:153243       | CO350212 | 0.055  | 0.999867629 |
| LOC100007645     | CO350218 | -0.045 | 0.999867629 |
| sinup            | CO350225 | 0.133  | 0.999867629 |
| lgals2a          | CO350239 | -0.161 | 0.999867629 |
| zgc:110753       | CO350241 | -0.237 | 0.994733513 |
| pif1             | CO350242 | 0.204  | 0.994733513 |
| wu:fb12c06       | CO350246 | 0.054  | 0.999867629 |
| zgc:110528       | CO350249 | -0.134 | 0.999867629 |
| zgc:171480       | CO350259 | 0.104  | 0.999867629 |
| nasP             | CO350260 | -0.035 | 0.999867629 |
| gng5             | CO350261 | -0.216 | 0.904071393 |
| coq9             | CO350263 | -0.159 | 0.991938187 |
| dtymk            | CO350265 | 0.037  | 0.999867629 |
| calm3a           | CO350277 | -0.186 | 0.999867629 |
| ckbb             | CO350278 | 0.051  | 0.999867629 |
| lgi1a            | CO350279 | -0.075 | 0.999867629 |
| im:7142489       | CO350290 | 0.086  | 0.999867629 |
| zgc:193711       | CO350291 | 0.022  | 0.999867629 |
| terf1            | CO350293 | -0.036 | 0.999867629 |
| atg12            | CO350297 | 0.009  | 0.999867629 |
| LOC100331690     | CO350303 | -0.082 | 0.999867629 |
| cpa5             | CO350307 | 0.12   | 0.999867629 |
| NA               | CO350313 | -0.032 | 0.999867629 |
| taf13            | CO350332 | -0.126 | 0.999867629 |
| zgc:56259        | CO350336 | -0.136 | 0.999867629 |
| LOC100150804     | CO350340 | -0.017 | 0.999867629 |
| tuba814          | CO350343 | 0.1    | 0.999867629 |

|                  |          |        |             |
|------------------|----------|--------|-------------|
| NA               | CO350346 | 0.418  | 0.880296881 |
| LOC100535162     | CO350347 | 0.01   | 0.999867629 |
| tubb2c           | CO350350 | -0.281 | 0.729063158 |
| NA               | CO350360 | 0.11   | 0.999867629 |
| zgc:77051        | CO350366 | 0.162  | 0.991938187 |
| zgc:101748       | CO350367 | -0.047 | 0.999867629 |
| rpz2             | CO350370 | 0.995  | 0.0766775   |
| mid1ip1          | CO350377 | 0.179  | 0.999867629 |
| cldng            | CO350381 | -0.151 | 0.999867629 |
| rhogc            | CO350387 | 0.254  | 0.700943912 |
| NA               | CO350393 | -0.282 | 0.895539927 |
| txndc5           | CO350395 | -0.226 | 0.999867629 |
| NA               | CO350397 | 0.023  | 0.999867629 |
| zgc:171777       | CO350401 | -0.095 | 0.999867629 |
| zgc:136336       | CO350402 | -0.015 | 0.999867629 |
| NA               | CO350409 | 0.069  | 0.999867629 |
| cry1l            | CO350412 | -0.048 | 0.999867629 |
| id2a             | CO350414 | -0.012 | 0.999867629 |
| LOC100330746     | CO350416 | 0.028  | 0.999867629 |
| ctrb1            | CO350417 | 0.115  | 0.999867629 |
| wee2             | CO350419 | -0.09  | 0.999867629 |
| zgc:111868       | CO350423 | -0.173 | 0.999867629 |
| zgc:109957       | CO350426 | 0.157  | 0.999867629 |
| zgc:153251       | CO350434 | -0.174 | 0.999867629 |
| pou5f1           | CO350445 | 0.413  | 0.467651032 |
| fam136a          | CO350450 | -0.195 | 0.999867629 |
| EIF5A2           | CO350453 | -0.187 | 0.999867629 |
| pi4kb            | CO350456 | 0.296  | 0.895539927 |
| psmb2            | CO350463 | -0.023 | 0.999867629 |
| ryr1b            | CO350465 | -0.135 | 0.999867629 |
| si:ch211-14a17.7 | CO350473 | -0.292 | 0.999867629 |
| NA               | CO350488 | 0.136  | 0.999867629 |
| si:dkeyp-50f7.2  | CO350498 | -0.004 | 0.999867629 |
| prdx5            | CO350499 | -0.177 | 0.999867629 |
| uqcrc2b          | CO350500 | 0.194  | 0.999867629 |
| rpp21            | CO350503 | -0.001 | 0.999867629 |
| zgc:56706        | CO350506 | 0.068  | 0.999867629 |
| ppp1r1l          | CO350510 | 0.16   | 0.999867629 |
| wu:fd16d01       | CO350516 | 0.145  | 0.999867629 |
| zgc:55413        | CO350518 | -0.602 | 0.383323778 |
| ckbb             | CO350519 | -0.016 | 0.999867629 |
| zgc:112305       | CO350520 | -0.048 | 0.999867629 |
| mfsd2ab          | CO350521 | 0.002  | 0.999867629 |

|                   |          |        |             |
|-------------------|----------|--------|-------------|
| si:dkeyp-46h3.2   | CO350524 | 0.033  | 0.999867629 |
| zp2.6             | CO350532 | -0.147 | 0.999867629 |
| gps2              | CO350537 | 0.001  | 0.999867629 |
| zp3c              | CO350538 | -0.176 | 0.999867629 |
| sf3b5             | CO350541 | -0.101 | 0.999867629 |
| ctu2              | CO350557 | -0.148 | 0.999867629 |
| nsun4             | CO350561 | -0.323 | 0.661633177 |
| wdr61             | CO350562 | 0.025  | 0.999867629 |
| NA                | CO350565 | 0.602  | 0.235191638 |
| lhx8a             | CO350568 | 0.127  | 0.999867629 |
| zglp1             | CO350569 | 0.268  | 0.999867629 |
| crfb2             | CO350572 | 0.152  | 0.999867629 |
| uba1              | CO350576 | 0.133  | 0.999867629 |
| wu:fc06d12        | CO350578 | 0.201  | 0.991938187 |
| zgc:136330        | CO350579 | -0.044 | 0.999867629 |
| exosc5            | CO350582 | -0.316 | 0.884004645 |
| chchd10           | CO350585 | -0.064 | 0.999867629 |
| zgc:136263        | CO350586 | 0.306  | 0.708947213 |
| LOC100332117      | CO350588 | -0.1   | 0.999867629 |
| ppp2cb            | CO350590 | 0.002  | 0.999867629 |
| LOC100538094      | CO350598 | -0.058 | 0.999867629 |
| mt2               | CO350599 | -0.164 | 0.999867629 |
| ccnb1             | CO350600 | -0.063 | 0.999867629 |
| zgc:110816        | CO350603 | -0.009 | 0.999867629 |
| cox4i1            | CO350604 | -0.005 | 0.999867629 |
| imp3              | CO350605 | 0.059  | 0.999867629 |
| zgc:172056        | CO350607 | 0.138  | 0.999867629 |
| LOC100535366      | CO350609 | -0.251 | 0.999867629 |
| zgc:85752         | CO350610 | 0.049  | 0.999867629 |
| mrpl22            | CO350622 | 0.084  | 0.999867629 |
| si:dkey-37o8.1    | CO350623 | 0.137  | 0.999867629 |
| im:7158796        | CO350627 | -0.205 | 0.999867629 |
| si:ch211-268m12.6 | CO350631 | 0.217  | 0.921064343 |
| zgc:175135        | CO350634 | -0.064 | 0.999867629 |
| si:dkey-167i21.2  | CO350650 | -0.029 | 0.999867629 |
| lman2             | CO350665 | -0.038 | 0.999867629 |
| bzw1b             | CO350666 | 0.049  | 0.999867629 |
| zgc:113424        | CO350671 | 0.103  | 0.999867629 |
| fam49bb           | CO350681 | 0.431  | 0.375134027 |
| ebp               | CO350684 | 0.149  | 0.999867629 |
| LOC100334510      | CO350702 | 0.291  | 0.477613018 |
| zgc:114123        | CO350704 | 0.156  | 0.999867629 |
| si:dkey-77a20.7   | CO350708 | 0.005  | 0.999867629 |



|                   |          |        |             |
|-------------------|----------|--------|-------------|
| sdhdb             | CO350709 | 0.475  | 0.343310642 |
| NA                | CO350712 | 0.071  | 0.999867629 |
| rpl11             | CO350714 | -0.048 | 0.999867629 |
| LOC100534993      | CO350720 | 1.036  | 0.467651032 |
| LOC100332229      | CO350723 | -0.269 | 0.999867629 |
| LOC100534660      | CO350740 | -0.273 | 0.711808311 |
| suz12a            | CO350742 | 0.196  | 0.99124371  |
| btg2              | CO350746 | -0.019 | 0.999867629 |
| zgc:123190        | CO350752 | 0.026  | 0.999867629 |
| hyou1             | CO350754 | 0.416  | 0.581752554 |
| ap1s2             | CO350755 | 0.047  | 0.999867629 |
| eif4e1b           | CO350757 | -0.048 | 0.999867629 |
| zgc:111961        | CO350759 | 0.147  | 0.999867629 |
| smarca5           | CO350765 | 0.131  | 0.999867629 |
| mcm2              | CO350769 | -0.097 | 0.999867629 |
| LOC795535         | CO350772 | -0.134 | 0.999867629 |
| kpna2             | CO350773 | -0.029 | 0.999867629 |
| NA                | CO350774 | 0.704  | 0.094304931 |
| si:ch211-215a10.4 | CO350782 | 0.199  | 0.999867629 |
| LOC100333229      | CO350786 | 0.304  | 0.953457709 |
| wu:fi38e01        | CO350790 | -0.212 | 0.999867629 |
| dis3              | CO350806 | 0.197  | 0.842886652 |
| retsatl           | CO350808 | -0.021 | 0.999867629 |
| NA                | CO352613 | -0.055 | 0.999867629 |
| sod1              | CO352625 | 0.07   | 0.999867629 |
| zgc:153256        | CO352627 | -0.099 | 0.999867629 |
| NA                | CO352630 | 0.419  | 0.801561504 |
| ola1              | CO352634 | 0.001  | 0.999867629 |
| tpi1b             | CO352643 | 0.223  | 0.999867629 |
| cebpb             | CO352647 | -0.676 | 0.184157163 |
| wu:fj04c06        | CO352656 | 0.108  | 0.999867629 |
| zgc:153918        | CO352675 | -0.106 | 0.999867629 |
| ccdc113           | CO352679 | 0.747  | 0.350215418 |
| zgc:194314        | CO352680 | 0.817  | 0.805493158 |
| NA                | CO352702 | -0.344 | 0.999867629 |
| lgals3bpb         | CO352707 | 0.079  | 0.999867629 |
| rpl5a             | CO352711 | 0.05   | 0.999867629 |
| zgc:101540        | CO352713 | 0.18   | 0.999867629 |
| ctsba             | CO352714 | 0.027  | 0.999867629 |
| dcun1d1           | CO352717 | 0.207  | 0.813455656 |
| LOC795887         | CO352720 | 0.042  | 0.999867629 |
| immp11            | CO352727 | 0.108  | 0.999867629 |
| LOC100334417      | CO352731 | 0.279  | 0.999867629 |

|                   |          |        |             |
|-------------------|----------|--------|-------------|
| rhoaa             | CO352732 | 0.111  | 0.999867629 |
| pdia3             | CO352736 | 0.094  | 0.999867629 |
| LOC100334248      | CO352742 | 0.12   | 0.999867629 |
| cdc25             | CO352749 | -0.009 | 0.999867629 |
| zgc:103496        | CO352754 | -0.038 | 0.999867629 |
| s100a10b          | CO352759 | -0.235 | 0.999867629 |
| NA                | CO352765 | 0.188  | 0.91869103  |
| zgc:162148        | CO352769 | -0.05  | 0.999867629 |
| zgc:77052         | CO352771 | 0.184  | 0.972516939 |
| fam65a            | CO352776 | 0.096  | 0.999867629 |
| rassf1            | CO352779 | 0.252  | 0.905640889 |
| akirin1           | CO352783 | 0.365  | 0.318787487 |
| mad211            | CO352803 | -0.16  | 0.999867629 |
| creg2             | CO352804 | -0.146 | 0.999867629 |
| gnmt              | CO352839 | -0.003 | 0.999867629 |
| h2afvl            | CO352847 | 0.172  | 0.999867629 |
| LOC100331859      | CO352848 | 0.043  | 0.999867629 |
| pcgf1             | CO352852 | -0.181 | 0.999867629 |
| NA                | CO352859 | 0.094  | 0.999867629 |
| zc3h7b            | CO352868 | -0.011 | 0.999867629 |
| cd63              | CO352872 | 0      | 0.999867629 |
| lmnl3             | CO352873 | -0.224 | 0.999867629 |
| LOC100538252      | CO352874 | 0.018  | 0.999867629 |
| pane1             | CO352883 | -0.258 | 0.943103959 |
| polr2d            | CO352891 | -0.077 | 0.999867629 |
| tomm20b           | CO352892 | 0.099  | 0.999867629 |
| LOC100534896      | CO352898 | 0.012  | 0.999867629 |
| snrpd3l           | CO352904 | 0.044  | 0.999867629 |
| nudc              | CO352907 | 0.235  | 0.999867629 |
| NA                | CO352909 | 0.059  | 0.999867629 |
| zgc:114188        | CO352910 | -0.119 | 0.999867629 |
| cdadc1            | CO352911 | 0.222  | 0.999867629 |
| zgc:153978        | CO352924 | 0.203  | 0.999867629 |
| stat1a            | CO352930 | 0.262  | 0.994231139 |
| zgc:154141        | CO352931 | -0.216 | 0.999867629 |
| si:ch211-261c8.5  | CO352943 | 0.107  | 0.999867629 |
| haus3             | CO352955 | 0.076  | 0.999867629 |
| si:dkey-23c22.6   | CO352969 | -0.044 | 0.999867629 |
| h1fx              | CO352972 | -0.15  | 0.999867629 |
| si:ch211-202h22.6 | CO352973 | -0.174 | 0.999867629 |
| gabpa             | CO352974 | -0.112 | 0.999867629 |
| LOC100534968      | CO352975 | -0.087 | 0.999867629 |
| hspe1             | CO352980 | -0.132 | 0.999867629 |

|              |          |        |             |
|--------------|----------|--------|-------------|
| anxa11a      | CO352997 | 0.003  | 0.999867629 |
| star         | CO353010 | -0.249 | 0.943103959 |
| ndufa4l      | CO353018 | 0.172  | 0.994231139 |
| rfc4         | CO353037 | -0.663 | 0.863522341 |
| apoeb        | CO353040 | -0.556 | 0.490924889 |
| ubr7         | CO353047 | -0.057 | 0.999867629 |
| krt8         | CO353051 | -0.327 | 0.999867629 |
| zc3h7a       | CO353052 | -0.053 | 0.999867629 |
| ndc80        | CO353062 | 0.086  | 0.999867629 |
| zgc:113050   | CO353063 | -0.106 | 0.999867629 |
| LOC100151188 | CO353068 | -0.118 | 0.999867629 |
| ola1         | CO353082 | 0.005  | 0.999867629 |
| NA           | CO353085 | 0.071  | 0.999867629 |
| NA           | CO353086 | 0.194  | 0.999867629 |
| cltc4        | CO353091 | 0.166  | 0.999867629 |
| NA           | CO353094 | -0.071 | 0.999867629 |
| ctsf         | CO353100 | 0.346  | 0.948512237 |
| LOC100333245 | CO353102 | 0.003  | 0.999867629 |
| NA           | CO353103 | 0.061  | 0.999867629 |
| cel.1        | CO353105 | 0.264  | 0.999867629 |
| LOC100150205 | CO353106 | -0.003 | 0.999867629 |
| gstp1        | CO353110 | 0.029  | 0.999867629 |
| hnmpu        | CO353111 | 0.217  | 0.999867629 |
| NA           | CO353114 | -0.159 | 0.999867629 |
| rps27a       | CO353115 | -0.209 | 0.960943871 |
| psmd12       | CO353118 | 0.648  | 0.030077935 |
| cbx3b        | CO353131 | 0.294  | 0.915413325 |
| LOC100332249 | CO353139 | 0.344  | 0.999867629 |
| LOC100536401 | CO353140 | -0.131 | 0.999867629 |
| NA           | CO353146 | -0.225 | 0.999867629 |
| anxa2a       | CO353154 | -0.233 | 0.999867629 |
| degs2        | CO353164 | 0.092  | 0.999867629 |
| NA           | CO353191 | -0.018 | 0.999867629 |
| rgs5a        | CO353195 | 0.033  | 0.999867629 |
| NA           | CO353196 | 0.504  | 0.73063815  |
| gas8         | CO353198 | -0.051 | 0.999867629 |
| NA           | CO353209 | -0.01  | 0.999867629 |
| LOC792676    | CO353210 | -0.245 | 0.895539927 |
| NA           | CO353222 | -0.202 | 0.999867629 |
| NA           | CO353223 | 0.363  | 0.999867629 |
| imp4         | CO353225 | -0.057 | 0.999867629 |
| exosc9       | CO353229 | 0.143  | 0.999867629 |
| cct3         | CO353233 | 0.118  | 0.999867629 |

|              |          |        |             |
|--------------|----------|--------|-------------|
| arl3         | CO353238 | -0.209 | 0.999867629 |
| rps15a       | CO353243 | -0.219 | 0.999867629 |
| zgc:73328    | CO353247 | -0.239 | 0.902634316 |
| rpl24        | CO353339 | -0.056 | 0.999867629 |
| seta         | CO353337 | 0.206  | 0.987860536 |
| NA           | CO353336 | 0.331  | 0.763138748 |
| gpx1a        | CO353334 | -0.272 | 0.999867629 |
| letm2        | CO353330 | 0.521  | 0.566941562 |
| NA           | CO353329 | 0.4    | 0.725736181 |
| zgc:101569   | CO353324 | -0.073 | 0.999867629 |
| fkbp1aa      | CO353318 | -0.098 | 0.999867629 |
| LOC555512    | CO353317 | -0.033 | 0.999867629 |
| snx9         | EV854635 | -0.055 | 0.999867629 |
| fth1a        | CO353311 | 0.048  | 0.999867629 |
| gorasp2      | EV854636 | 0.001  | 0.999867629 |
| ccng1        | CO353308 | 0.652  | 0.135239431 |
| tomm20a      | CO353307 | -0.19  | 0.828060885 |
| zgc:56699    | CO353304 | -0.345 | 0.901752348 |
| LOC100329811 | CO353301 | -0.07  | 0.999867629 |
| zgc:56699    | CO353298 | -0.208 | 0.999867629 |
| rad1         | CO353288 | 0.284  | 0.943103959 |
| zgc:110337   | CO353271 | 0.146  | 0.999867629 |
| cdc42        | CO353267 | 0.29   | 0.999867629 |
| ldhd         | CO353266 | 0.452  | 0.113582002 |
| LOC100537497 | CO353263 | -0.078 | 0.999867629 |
| cops2        | CO353260 | -0.094 | 0.999867629 |
| NA           | CO353259 | -0.212 | 0.999867629 |
| NA           | CO353254 | 0.412  | 0.949853545 |
| rpl12        | CO353429 | -0.191 | 0.999867629 |
| vdac3        | CO353428 | -0.015 | 0.999867629 |
| acin1a       | CO353427 | 0.297  | 0.915413325 |
| LOC100535659 | CO353401 | 0.126  | 0.999867629 |
| tpm3         | CO353400 | -0.052 | 0.999867629 |
| LOC100535363 | CO353398 | -0.18  | 0.999867629 |
| hmgb1a       | CO353395 | -0.281 | 0.999867629 |
| smad7        | CO353392 | 0.087  | 0.999867629 |
| ran          | CO353386 | 0.009  | 0.999867629 |
| hmgn2        | CO353377 | -0.389 | 0.991938187 |
| saga         | CO353372 | -0.075 | 0.999867629 |
| cdk2ap2      | CO353359 | -0.144 | 0.999867629 |
| zgc:77177    | CO353416 | 0.252  | 0.743689125 |
| wu:fb21f05   | CO353417 | 0.202  | 0.999867629 |
| NA           | CO353420 | -0.178 | 0.999867629 |

|                   |          |        |             |
|-------------------|----------|--------|-------------|
| vdac3             | CO353428 | 0.181  | 0.999867629 |
| vdac3             | CO353434 | 0.375  | 0.539675992 |
| grap2b            | CO353451 | -0.091 | 0.999867629 |
| NA                | CO353457 | -0.124 | 0.999867629 |
| hnrmpa0           | CO353476 | 0.368  | 0.665661454 |
| NA                | CO353477 | -0.064 | 0.999867629 |
| ak4               | CO353480 | -0.161 | 0.999867629 |
| NA                | CO353482 | 0.206  | 0.91869103  |
| zgc:123105        | CO353492 | -0.406 | 0.762113491 |
| hnrnpul1          | CO353500 | 0.225  | 0.872516471 |
| NA                | CO353502 | 0.116  | 0.999867629 |
| LOC565998         | CO353503 | -0.299 | 0.999867629 |
| tars              | CO353505 | 0.167  | 0.994231139 |
| NA                | CO353516 | -0.133 | 0.999867629 |
| NA                | CO353517 | 0.51   | 0.991938187 |
| NA                | CO353527 | 0.195  | 0.999867629 |
| zgc:136763        | CO353528 | -0.399 | 0.763138748 |
| pgk1              | CO353531 | 0.327  | 0.816937804 |
| LOC100334568      | CO353537 | 0.03   | 0.999867629 |
| NA                | CO353541 | 0.013  | 0.999867629 |
| zgc:152925        | CO353559 | 0.316  | 0.773606448 |
| LOC100005118      | CO353563 | -0.027 | 0.999867629 |
| LOC100330070      | CO353564 | -0.164 | 0.999867629 |
| cst3              | CO353578 | 0.51   | 0.665661454 |
| capza1a           | CO353591 | 0.087  | 0.999867629 |
| zgc:56095         | CO353598 | 0.01   | 0.999867629 |
| si:ch211-240119.8 | CO353604 | -0.032 | 0.999867629 |
| zgc:103599        | CO353615 | -0.015 | 0.999867629 |
| rcor1             | CO353622 | 0.657  | 0.046428959 |
| smx5              | CO353623 | -0.093 | 0.999867629 |
| LOC553527         | CO353624 | -0.111 | 0.999867629 |
| foxo3a            | CO353645 | 0.173  | 0.999867629 |
| NA                | CO353646 | 0.074  | 0.999867629 |
| cd151             | CO353648 | 0.194  | 0.999867629 |
| rgs5a             | CO353660 | 0.139  | 0.999867629 |
| NA                | CO353671 | -0.014 | 0.999867629 |
| zgc:153952        | CO353672 | -0.413 | 0.785606951 |
| sec61g            | CO353680 | 0.291  | 0.709698843 |
| NA                | CO353683 | -0.045 | 0.999867629 |
| f8                | CO353685 | 0.096  | 0.999867629 |
| LOC100147862      | CO353691 | 0.028  | 0.999867629 |
| LOC100151188      | CO353696 | 0.495  | 0.545196011 |
| wu:fc26g07        | CO353698 | 0.879  | 0.038384219 |

|                 |          |        |             |
|-----------------|----------|--------|-------------|
| ckba            | CO353712 | 0.194  | 0.943103959 |
| NA              | CO353717 | 0.235  | 0.991938187 |
| tax1bp1b        | CO353722 | -0.221 | 0.999867629 |
| plaa            | CO353727 | -0.065 | 0.999867629 |
| rps2            | CO353733 | -0.27  | 0.813455656 |
| rif1            | CO353749 | 0.329  | 0.957746839 |
| crym            | CO353761 | 0.073  | 0.999867629 |
| plekhg4         | CO353772 | -0.379 | 0.773606448 |
| im:7162646      | CO353782 | 0.009  | 0.999867629 |
| LOC556426       | CO353796 | -0.077 | 0.999867629 |
| slc25a1         | CO353809 | 0.021  | 0.999867629 |
| zgc:152916      | CO353810 | -0.044 | 0.999867629 |
| zgc:65861       | CO353813 | -0.004 | 0.999867629 |
| podxl           | CO353822 | 0.025  | 0.999867629 |
| dennd1a         | CO353849 | -0.006 | 0.999867629 |
| si:dkey-7814.13 | CO353856 | 0.119  | 0.999867629 |
| LOC797338       | CO353858 | -0.012 | 0.999867629 |
| NA              | CO353864 | -0.038 | 0.999867629 |
| zgc:101723      | CO353871 | -0.276 | 0.974898761 |
| zgc:92683       | CO353879 | -0.075 | 0.999867629 |
| apoc11          | CO353881 | 0.29   | 0.999867629 |
| LOC555988       | CO353882 | 0.417  | 0.999867629 |
| acta2           | CO353886 | -0.581 | 0.994231139 |
| faub            | CO353903 | -0.009 | 0.999867629 |
| hmgn3           | CO353907 | -0.336 | 0.991938187 |
| ehhadh          | CO353913 | 0.086  | 0.999867629 |
| abca1a          | CO353918 | 0.177  | 0.999867629 |
| NA              | CO353919 | -0.149 | 0.999867629 |
| LOC100151188    | CO353922 | 0.046  | 0.999867629 |
| zgc:77734       | CO353938 | 0.381  | 0.945496623 |
| slc25a3b        | CO353939 | 0.12   | 0.999867629 |
| zgc:92237       | CO353942 | -0.325 | 0.9064934   |
| NA              | CO353946 | 0.932  | 0.999867629 |
| NA              | CO353952 | 0.068  | 0.999867629 |
| si:dkey-20i10.6 | CO353960 | 0.223  | 0.991938187 |
| ddhd1           | CO353964 | 0.086  | 0.999867629 |
| NA              | CO353968 | 0.076  | 0.999867629 |
| NA              | CO353992 | 0.11   | 0.999867629 |
| NA              | CO353993 | 0.12   | 0.999867629 |
| NA              | CO354000 | 0.506  | 0.350355675 |
| zgc:123017      | CO354004 | -0.069 | 0.999867629 |
| zgc:158604      | CO354006 | -0.103 | 0.999867629 |
| elovl7a         | CO354011 | 0.626  | 0.373668752 |

|                  |          |        |             |
|------------------|----------|--------|-------------|
| myo18l2          | CO354014 | -0.164 | 0.999867629 |
| zgc:193690       | CO354016 | 0.027  | 0.999867629 |
| LOC100329375     | CO354019 | -0.203 | 0.999867629 |
| zgc:92458        | CO354022 | 0.184  | 0.999867629 |
| si:dkey-25e12.3  | CO354033 | 0.315  | 0.54132807  |
| LOC568334        | CO354040 | -0.062 | 0.999867629 |
| lasp1            | CO354047 | -0.24  | 0.953457709 |
| zgc:66430        | CO354050 | 0.119  | 0.999867629 |
| NA               | CO354064 | -0.079 | 0.999867629 |
| bmpr2a           | CO354068 | 0.1    | 0.999867629 |
| ncf2             | CO354069 | 0.074  | 0.999867629 |
| si:ch211-66i15.4 | CO354078 | 0.217  | 0.999867629 |
| NA               | CO354080 | 0.054  | 0.999867629 |
| irf9             | CO354086 | 0.057  | 0.999867629 |
| birc5a           | CO354108 | -0.026 | 0.999867629 |
| ahcy             | CO354113 | -0.022 | 0.999867629 |
| tagln            | CO354115 | -0.531 | 0.455280153 |
| zgc:63675        | CO354121 | 0.364  | 0.999867629 |
| zgc:92590        | CO354123 | 1.092  | 0.999867629 |
| ppm1h            | CO354127 | 0.071  | 0.999867629 |
| krt18            | CO354132 | 0.157  | 0.999867629 |
| im:7139388       | CO354135 | 0.358  | 0.999867629 |
| fkbp5            | CO354143 | 0.226  | 0.999867629 |
| nme5             | CO350816 | -0.162 | 0.999867629 |
| LOC100330476     | CO350821 | -0.006 | 0.999867629 |
| zgc:158412       | CO350830 | -0.201 | 0.99124371  |
| sdhaf2           | CO350832 | 0.433  | 0.370538846 |
| gnmt             | CO350833 | -0.181 | 0.999867629 |
| LOC566907        | CO350836 | -0.254 | 0.999867629 |
| hnrnpab          | CO350847 | 0.39   | 0.763138748 |
| zp3              | CO350858 | -0.146 | 0.999867629 |
| ube2a            | CO350860 | 0.046  | 0.999867629 |
| EIF1AXA          | CO350862 | 0.336  | 0.721671807 |
| taf9             | CO350872 | 0.139  | 0.999867629 |
| EIF1AXB          | CO350873 | -0.128 | 0.999867629 |
| zgc:101569       | CO350886 | -0.337 | 0.999867629 |
| LOC796684        | CO350888 | 0.033  | 0.999867629 |
| mcl1a            | CO350906 | -0.093 | 0.999867629 |
| zgc:171670       | CO350917 | 0.184  | 0.999867629 |
| LOC793850        | CO350918 | 0.136  | 0.999867629 |
| rps3             | CO350921 | -0.149 | 0.999867629 |
| zp2l1            | CO350923 | 0.076  | 0.999867629 |
| zgc:103652       | CO350931 | -0.043 | 0.999867629 |

|                  |          |        |             |
|------------------|----------|--------|-------------|
| NA               | CO350933 | -0.533 | 0.269298041 |
| ube2g1b          | CO350939 | 0.074  | 0.999867629 |
| lsm14b           | CO350940 | 0.18   | 0.999867629 |
| rpl3             | CO350952 | -0.076 | 0.999867629 |
| zgc:173544       | CO350964 | -0.195 | 0.999867629 |
| orc1             | CO350968 | -0.123 | 0.999867629 |
| cldnd            | CO350971 | -0.227 | 0.999867629 |
| zgc:162945       | CO350972 | 0.146  | 0.999867629 |
| tpi1a            | CO350978 | 0.059  | 0.999867629 |
| zgc:162344       | CO350982 | 0.045  | 0.999867629 |
| LOC100536069     | CO350984 | 0.837  | 0.071393808 |
| zgc:173544       | CO350986 | -0.791 | 0.294269812 |
| LOC556271        | CO350990 | -0.012 | 0.999867629 |
| rtn1a            | CO350996 | 0.132  | 0.999867629 |
| meir5            | CO351003 | -0.34  | 0.773606448 |
| nfs1             | CO351004 | 0.109  | 0.999867629 |
| zgc:92808        | CO351006 | 0.075  | 0.999867629 |
| si:ch211-239j9.2 | CO351008 | 0.291  | 0.521435994 |
| tuba4l           | CO351009 | -0.005 | 0.999867629 |
| NA               | CO351012 | -0.012 | 0.999867629 |
| zgc:101026       | CO351017 | -0.116 | 0.999867629 |
| vtg1             | CO351022 | -1.13  | 0.558636588 |
| LOC100535176     | CO351029 | -0.011 | 0.999867629 |
| org              | CO351030 | -0.49  | 0.602859543 |
| zp2.6            | CO351043 | -0.345 | 0.999867629 |
| sap18            | CO351045 | -0.103 | 0.999867629 |
| NA               | CO351046 | -0.032 | 0.999867629 |
| rps4x            | CO351048 | -0.317 | 0.896180358 |
| LOC100535344     | CO351060 | -0.058 | 0.999867629 |
| plp1b            | CO351063 | 0.042  | 0.999867629 |
| LOC571155        | CO351066 | 0.278  | 0.896180358 |
| dvr1             | CO351067 | 0.423  | 0.802576919 |
| thy1             | CO351069 | 0.192  | 0.999867629 |
| LOC100535597     | CO351075 | -0.295 | 0.863522341 |
| si:ch211-69g19.2 | CO351079 | 0.025  | 0.999867629 |
| LOC100534658     | CO351081 | -0.265 | 0.902634316 |
| zgc:56457        | CO351083 | -0.071 | 0.999867629 |
| wu:fc47e11       | CO351084 | -0.47  | 0.521435994 |
| znr1             | CO351086 | -0.288 | 0.650957948 |
| si:ch211-225p5.3 | CO351089 | 0.289  | 0.773606448 |
| zgc:100919       | CO351092 | -0.027 | 0.999867629 |
| ppial            | CO351094 | 0.019  | 0.999867629 |
| dap1b            | CO351096 | 0.737  | 0.593902327 |



|                   |          |        |             |
|-------------------|----------|--------|-------------|
| zgc:174237        | CO351100 | 0.091  | 0.999867629 |
| zgc:56565         | CO351109 | -0.232 | 0.999867629 |
| si:dkey-188i13.1  | CO351115 | 0.289  | 0.987860536 |
| gapdhs            | CO351120 | -0.545 | 0.521435994 |
| wu:fd16d01        | CO351130 | 0.172  | 0.999867629 |
| cirbp             | CO351143 | 0.005  | 0.999867629 |
| cldn11a           | CO351145 | 0.013  | 0.999867629 |
| NA                | CO351146 | -0.169 | 0.999867629 |
| NA                | CO351158 | -0.108 | 0.999867629 |
| snai1a            | CO351162 | -0.035 | 0.999867629 |
| zgc:136896        | CO351163 | -0.174 | 0.999867629 |
| LOC100000999      | CO351167 | 0.064  | 0.999867629 |
| LOC555475         | CO351168 | 0.05   | 0.999867629 |
| fam20b            | CO351170 | -0.134 | 0.999867629 |
| eef2b             | CO351197 | -0.302 | 0.900973145 |
| si:ch211-234p6.13 | CO351198 | 0.095  | 0.999867629 |
| pdhb              | CO351218 | -0.016 | 0.999867629 |
| atp5c1            | CO351232 | -0.208 | 0.991938187 |
| mfige8b           | CO351243 | -0.414 | 0.550708371 |
| zgc:63694         | CO351246 | 0.15   | 0.999867629 |
| zgc:195245        | CO351264 | -0.149 | 0.999867629 |
| NA                | CO351282 | 0.009  | 0.999867629 |
| LOC100534948      | CO351287 | 0.124  | 0.999867629 |
| LOC100334439      | CO351289 | -0.116 | 0.999867629 |
| snrpb2            | CO351298 | -0.017 | 0.999867629 |
| bactin2           | CO353568 | -0.405 | 0.994733513 |
| zgc:171818        | CO351310 | -0.714 | 0.324380687 |
| zgc:173837        | CO351317 | -0.234 | 0.96017015  |
| LOC792474         | CO351361 | -0.048 | 0.999867629 |
| zp3b              | CO351366 | -0.06  | 0.999867629 |
| atl3              | CO351372 | -0.065 | 0.999867629 |
| LOC562097         | CO351380 | -0.201 | 0.893655011 |
| NA                | CO351390 | -0.131 | 0.999867629 |
| zgc:112356        | CO351391 | -0.129 | 0.999867629 |
| zgc:153499        | CO351399 | -0.233 | 0.999867629 |
| mos               | CO351401 | -0.344 | 0.868203261 |
| zgc:163047        | CO351422 | -0.062 | 0.999867629 |
| LOC100536090      | CO351425 | 0.352  | 0.773606448 |
| LOC560808         | CO351447 | -0.115 | 0.999867629 |
| ola1              | CO351453 | -0.093 | 0.999867629 |
| pvalb7            | CO351457 | -0.117 | 0.999867629 |
| galcb             | CO351474 | 0.282  | 0.842435779 |
| zgc:195154        | CO351481 | 0.121  | 0.999867629 |

|                  |          |        |             |
|------------------|----------|--------|-------------|
| btg1             | CO351489 | 0.083  | 0.999867629 |
| zgc:92261        | CO351499 | 0.027  | 0.999867629 |
| LOC799290        | CO351500 | -0.037 | 0.999867629 |
| vat1             | CO351505 | 0.433  | 0.875026087 |
| LOC100536577     | CO351506 | -0.081 | 0.999867629 |
| sfswap           | CO351507 | 0.199  | 0.999867629 |
| zgc:162431       | CO351508 | 0.369  | 0.868203261 |
| il13ra2          | CO351514 | 0.376  | 0.999867629 |
| NA               | CO351516 | 0.812  | 0.015857549 |
| lsm11            | CO351518 | 0.031  | 0.999867629 |
| rpl7l1           | CO351519 | -0.068 | 0.999867629 |
| paics            | CO351520 | -0.024 | 0.999867629 |
| hif1ab           | CO351522 | -0.252 | 0.991938187 |
| LOC100535616     | CO351530 | 0.303  | 0.999867629 |
| zgc:110304       | CO351533 | 0.121  | 0.999867629 |
| cpe              | CO351537 | 0.367  | 0.639965294 |
| ccne             | CO351539 | 0.378  | 0.616700328 |
| si:ch73-46j18.5  | CO351540 | -0.003 | 0.999867629 |
| tpst1            | CO351543 | -0.002 | 0.999867629 |
| wu:fi04f09       | CO351552 | 0.256  | 0.999867629 |
| LOC100004563     | CO351560 | 0.256  | 0.905640889 |
| aurkb            | CO351563 | -0.053 | 0.999867629 |
| sec61a1          | CO351567 | -0.002 | 0.999867629 |
| smn1             | CO351568 | -0.182 | 0.9419302   |
| zgc:77767        | CO351578 | -0.167 | 0.999867629 |
| zgc:112231       | CO351579 | -0.361 | 0.591198801 |
| cyp11a1          | CO351589 | -0.018 | 0.999867629 |
| si:dkey-170l10.1 | CO351591 | -0.295 | 0.665661454 |
| NA               | CO351593 | 0.706  | 0.581752554 |
| NA               | CO351611 | 0.354  | 0.646542916 |
| rbm4.1           | CO351615 | 0.938  | 0.094304931 |
| shfm1            | CO351618 | 0.324  | 0.559621554 |
| LOC100006146     | CO351636 | -0.068 | 0.999867629 |
| mrpl17           | CO351637 | -0.043 | 0.999867629 |
| si:dkey-97o5.1   | CO354150 | -0.194 | 0.999867629 |
| zgc:112397       | CO354162 | -0.156 | 0.999867629 |
| wu:fb25h12       | CO354172 | -0.152 | 0.999867629 |
| itm2bb           | CO354174 | 0.117  | 0.999867629 |
| ccna2            | CO354180 | -0.082 | 0.999867629 |
| zgc:114119       | CO354192 | -0.139 | 0.999867629 |
| zgc:101748       | CO354193 | -0.152 | 0.999867629 |
| fkbp1b           | CO354215 | 0.168  | 0.999867629 |
| NA               | CO354218 | 0.345  | 0.999867629 |

|                   |          |        |             |
|-------------------|----------|--------|-------------|
| col4a6            | CO354233 | 0.072  | 0.999867629 |
| krt4              | CO354256 | -0.973 | 0.646542916 |
| akap8l            | CO354263 | 0.202  | 0.999867629 |
| b2m               | CO354275 | -0.202 | 0.999867629 |
| hexim1            | CO354276 | 0.261  | 0.91869103  |
| nutf2l            | CO354283 | -0.059 | 0.999867629 |
| map1lc3b          | CO354294 | 0.288  | 0.765403958 |
| ppp1cbl           | CO354301 | -0.132 | 0.999867629 |
| zgc:153629        | CO354303 | 0.373  | 0.999867629 |
| LOC795545         | CO354306 | -0.064 | 0.999867629 |
| NA                | CO354323 | 0.378  | 0.659513547 |
| nol6              | CO354330 | -0.268 | 0.589499903 |
| gpx1a             | CO354339 | -0.349 | 0.999867629 |
| usp36             | CO354344 | 0.051  | 0.999867629 |
| LOC569147         | CO354351 | -0.154 | 0.999867629 |
| LOC100334807      | CO354352 | -0.114 | 0.999867629 |
| retsat            | CO354360 | 0.126  | 0.999867629 |
| LOC100151157      | CO354374 | -0.033 | 0.999867629 |
| cfr               | CO354389 | 0.05   | 0.999867629 |
| si:ch211-127n13.2 | CO354391 | -0.275 | 0.999867629 |
| NA                | CO354398 | 0.029  | 0.999867629 |
| zgc:162356        | CO354399 | 0.072  | 0.999867629 |
| zgc:101581        | CO354402 | -0.331 | 0.828060885 |
| ppp2cb            | CO354410 | 0.265  | 0.941642554 |
| NA                | CO354422 | -0.176 | 0.999867629 |
| slc25a5           | CO354426 | 0.002  | 0.999867629 |
| serbp1            | CO354428 | 0.222  | 0.994733513 |
| nme4              | CO354451 | 0.003  | 0.999867629 |
| acta1b            | CO354459 | -0.42  | 0.539675992 |
| col1a1b           | CO354495 | -0.698 | 0.743654556 |
| esco2             | CO354508 | -0.174 | 0.994733513 |
| rps24             | CO354523 | -0.433 | 0.795013911 |
| EIF1B             | CO354527 | -0.155 | 0.999867629 |
| NA                | CO354565 | 0.039  | 0.999867629 |
| galnt14           | CO354570 | 0.105  | 0.999867629 |
| flii              | CO354575 | 0.097  | 0.999867629 |
| thoc6             | CO354579 | -0.185 | 0.999867629 |
| zgc:153629        | CO354594 | 0.302  | 0.999867629 |
| gpd1l             | CO354622 | 0.134  | 0.999867629 |
| kif23             | CO354625 | 0.198  | 0.999867629 |
| zgc:92648         | CO354628 | 0.212  | 0.770255575 |
| aldh9a1a          | CO354630 | -0.225 | 0.991938187 |
| zgc:103627        | CO354631 | -0.108 | 0.999867629 |

|                   |          |        |             |
|-------------------|----------|--------|-------------|
| LOC799177         | CO354638 | -0.148 | 0.999867629 |
| hbaa1             | CO354643 | -0.58  | 0.999867629 |
| zgc:112425        | CO354648 | 0.654  | 0.236099138 |
| epb4113b          | CO354655 | -0.254 | 0.773606448 |
| LOC100536797      | CO354664 | 0.118  | 0.999867629 |
| im:7142942        | CO354667 | -0.201 | 0.991938187 |
| lpl               | CO354672 | 0.391  | 0.999867629 |
| spc24             | CO354676 | -0.117 | 0.999867629 |
| LOC100536039      | CO354678 | -0.161 | 0.999867629 |
| tp53inp1          | CO354681 | 0.21   | 0.999867629 |
| LOC100537823      | CO354682 | -0.282 | 0.639714665 |
| calm2b            | CO354684 | -0.142 | 0.999867629 |
| LOC556700         | CO354706 | -0.355 | 0.999867629 |
| ubtd2             | CO354727 | -0.077 | 0.999867629 |
| LOC100535659      | CO354733 | -0.109 | 0.999867629 |
| si:ch211-241p10.1 | CO354735 | -0.233 | 0.994231139 |
| NA                | CO354737 | 0.037  | 0.999867629 |
| zgc:110645        | CO354753 | -0.164 | 0.999867629 |
| pdk3a             | CO354755 | -0.154 | 0.999867629 |
| racgap1           | CO354762 | -0.269 | 0.965513812 |
| nid1a             | CO354764 | -0.031 | 0.999867629 |
| zgc:55461         | CO354786 | -0.065 | 0.999867629 |
| gsna              | CO354789 | -0.121 | 0.999867629 |
| ing5b             | CO354799 | 0.086  | 0.999867629 |
| LOC100538148      | CO354825 | 0.058  | 0.999867629 |
| smg7              | CO354840 | 0.015  | 0.999867629 |
| LOC100534665      | CO354869 | 0.054  | 0.999867629 |
| si:dkey-52k20.7   | CO354886 | -0.429 | 0.999867629 |
| LOC100537775      | CO354904 | 0.004  | 0.999867629 |
| zgc:77808         | CO354941 | 0.078  | 0.999867629 |
| NA                | CO354953 | 0.013  | 0.999867629 |
| hspa8             | CO354958 | 0.246  | 0.915413325 |
| NA                | CO354963 | 0.241  | 0.9849946   |
| zgc:112160        | CO354973 | -0.191 | 0.999867629 |
| NA                | CO354980 | 0.007  | 0.999867629 |
| zgc:92631         | CO354981 | 0.098  | 0.999867629 |
| NA                | CO354993 | -0.016 | 0.999867629 |
| vbp1              | CO355019 | -0.146 | 0.999867629 |
| LOC100005117      | CO355025 | 0.201  | 0.999867629 |
| atf4b1            | CO355031 | -0.211 | 0.999867629 |
| NA                | CO355033 | 0.956  | 0.945496623 |
| ywhaqa            | CO355039 | 0.338  | 0.999867629 |
| LOC100149647      | CO355043 | -0.17  | 0.999867629 |

|              |          |        |             |
|--------------|----------|--------|-------------|
| serinc1      | CO355046 | 0.295  | 0.999867629 |
| sparc        | CO355062 | -0.203 | 0.999867629 |
| NA           | CO355072 | -0.023 | 0.999867629 |
| LOC100538089 | CO355074 | -0.195 | 0.999867629 |
| scp2a        | CO355087 | 0.092  | 0.999867629 |
| ccl25b       | CO355088 | -0.019 | 0.999867629 |
| naca         | CO355090 | -0.17  | 0.999867629 |
| aurka        | CO355111 | 0.131  | 0.999867629 |
| LOC572312    | CO355112 | -0.546 | 0.302232085 |
| zgc:123339   | CO355125 | -0.269 | 0.999867629 |
| NA           | CO355133 | 0.128  | 0.999867629 |
| zgc:171959   | CO355135 | -0.072 | 0.999867629 |
| cfdl         | CO355141 | -1.468 | 0.371129828 |
| EIF4G2B      | CO355175 | 0.275  | 0.999867629 |
| flj110111    | CO355176 | 0.32   | 0.576845303 |
| NA           | CO355180 | -0.013 | 0.999867629 |
| LOC100536508 | CO355194 | -0.463 | 0.276665092 |
| ak2          | CO355206 | -0.207 | 0.999867629 |
| podxl        | CO355218 | 0.231  | 0.999867629 |
| NA           | CO355227 | 0.045  | 0.999867629 |
| tmem231      | CO355250 | -0.002 | 0.999867629 |
| NA           | CO355251 | -0.322 | 0.991938187 |
| farsb        | CO355265 | -0.26  | 0.721650173 |
| zgc:158426   | CO355284 | -0.021 | 0.999867629 |
| lifra        | CO355307 | -0.154 | 0.991938187 |
| NA           | CO355308 | -0.093 | 0.999867629 |
| zgc:92533    | CO355310 | -1.458 | 0.437930365 |
| arpc2        | CO355316 | 0.037  | 0.999867629 |
| rpl26        | CO355319 | 0.052  | 0.999867629 |
| anxa3b       | CO355333 | -0.07  | 0.999867629 |
| LOC100002956 | CO355342 | -0.038 | 0.999867629 |
| fxyd1        | CO355345 | -0.033 | 0.999867629 |
| fcrl1g1      | CO355346 | -0.218 | 0.999867629 |
| atp5h        | CO355349 | -0.276 | 0.999867629 |
| tagln2       | CO355354 | 0.119  | 0.999867629 |
| igfbp1a      | CO355363 | 0.013  | 0.999867629 |
| NA           | CO355373 | 0.024  | 0.999867629 |
| NA           | CO355381 | 0.085  | 0.999867629 |
| ugeg         | CO355394 | -0.124 | 0.999867629 |
| EIF3B        | CO355398 | -0.049 | 0.999867629 |
| coro1a       | CO355400 | -0.239 | 0.918577826 |
| mrpl38       | CO355412 | -0.241 | 0.999867629 |
| EIF3G        | CO355422 | -0.27  | 0.928440306 |

|                    |          |        |             |
|--------------------|----------|--------|-------------|
| NA                 | CO355447 | 0.006  | 0.999867629 |
| mmp2               | CO355454 | -0.134 | 0.999867629 |
| NA                 | CO355462 | 0.085  | 0.999867629 |
| LOC100535672       | CO355480 | -0.303 | 0.999867629 |
| thrap6             | CO355490 | -0.058 | 0.999867629 |
| bdh1               | CO355498 | -0.015 | 0.999867629 |
| pars2              | CO355509 | -0.037 | 0.999867629 |
| si:ch211-10e2.1    | CO355516 | -0.033 | 0.999867629 |
| mylz2              | CO355517 | -0.604 | 0.773606448 |
| vdac2              | CO355519 | -0.201 | 0.960943871 |
| nfil3              | CO355523 | -0.112 | 0.999867629 |
| NA                 | CO355532 | -0.116 | 0.999867629 |
| rps28              | CO355542 | -0.084 | 0.999867629 |
| lsmd1              | CO355543 | -0.426 | 0.371129828 |
| dpys               | CO355560 | 0.125  | 0.999867629 |
| eno1               | CO355562 | -0.134 | 0.999867629 |
| nubpl              | CO355564 | 0.123  | 0.999867629 |
| wu:fc48e01         | CO355569 | -0.089 | 0.999867629 |
| sept7a             | CO355593 | 0.042  | 0.999867629 |
| LOC100537763       | CO355597 | -0.011 | 0.999867629 |
| fn1b               | CO355598 | -0.018 | 0.999867629 |
| LOC100332577       | CO355615 | -0.072 | 0.999867629 |
| arhgdia            | CO355616 | -0.136 | 0.999867629 |
| si:ch1073-459j12.1 | CO355623 | -0.003 | 0.999867629 |
| baxb               | CO355630 | -0.038 | 0.999867629 |
| appb               | CO355640 | -0.145 | 0.999867629 |
| LOC100536095       | CO355651 | 0.091  | 0.999867629 |
| utp111             | CO355674 | 0.078  | 0.999867629 |
| aldob              | CO355676 | 0.682  | 0.999867629 |
| NA                 | CO355677 | -0.163 | 0.999867629 |
| atp2a3             | CO355691 | -0.225 | 0.90898895  |
| NA                 | CO355701 | -0.014 | 0.999867629 |
| hp1bp3             | CO355711 | -0.289 | 0.773606448 |
| kal1a              | CO355716 | -0.112 | 0.999867629 |
| slc7a3             | CO355717 | 0.03   | 0.999867629 |
| ttl1               | CO355728 | -0.187 | 0.957746839 |
| ssr4               | CO355744 | -0.203 | 0.999867629 |
| snrpa              | CO355749 | -0.051 | 0.999867629 |
| wu:fb18c02         | CO355762 | -0.03  | 0.999867629 |
| psmd4a             | CO355770 | -0.195 | 0.999867629 |
| hspb1              | CO355787 | -0.097 | 0.999867629 |
| f1na               | CO355792 | -0.191 | 0.999867629 |
| arhgef19           | CO355804 | 0.025  | 0.999867629 |

|                 |          |        |             |
|-----------------|----------|--------|-------------|
| LOC100537239    | CO355812 | -0.171 | 0.999867629 |
| rplp2           | CO355819 | -0.206 | 0.999867629 |
| LOC558023       | CO355825 | -0.046 | 0.999867629 |
| NA              | CO355836 | -0.064 | 0.999867629 |
| tob1b           | CO355844 | 0.33   | 0.928440306 |
| LOC563795       | CO355852 | 0.376  | 0.999867629 |
| syp12a          | CO355857 | 0.096  | 0.999867629 |
| NA              | CO355860 | 0.083  | 0.999867629 |
| zgc:110726      | CO355881 | -0.141 | 0.999867629 |
| LOC100535251    | CO355892 | -0.01  | 0.999867629 |
| eif3c           | CO355896 | -0.171 | 0.999867629 |
| NA              | CO355921 | -0.228 | 0.948512237 |
| itln1           | CO355924 | -0.001 | 0.999867629 |
| tcea3           | CO355931 | 0.017  | 0.999867629 |
| wu:fc55g01      | CO355932 | -0.47  | 0.837015575 |
| zgc:92321       | CO355982 | 0.161  | 0.999867629 |
| rbtnx           | CO355988 | -0.474 | 0.281304512 |
| carhsp1         | CO356006 | 0.145  | 0.999867629 |
| acta2           | CO356007 | -0.512 | 0.872516471 |
| tmed1b          | CO356013 | 0.276  | 0.999867629 |
| NA              | CO356019 | -0.043 | 0.999867629 |
| inka1b          | CO356024 | 0.213  | 0.999867629 |
| nucb2b          | CO356030 | 0.129  | 0.999867629 |
| NA              | CO356035 | 0.089  | 0.999867629 |
| LOC564766       | CO356062 | 0.479  | 0.48064577  |
| sae1            | CO356064 | -0.121 | 0.999867629 |
| NA              | CO356081 | -0.072 | 0.999867629 |
| dlgap5          | CO356094 | 0.062  | 0.999867629 |
| ttc9c           | CO356096 | 0.031  | 0.999867629 |
| LOC795882       | CO356097 | -0.077 | 0.999867629 |
| zgc:174710      | CO356101 | 0.369  | 0.637677505 |
| dtnbp1a         | CO356104 | 0.052  | 0.999867629 |
| try             | CO356113 | 0.155  | 0.999867629 |
| NA              | CO356117 | -0.151 | 0.999867629 |
| ormd11          | CO356128 | 0.099  | 0.999867629 |
| mpeg1           | CO356135 | 0.022  | 0.999867629 |
| LOC100534734    | CO356143 | 0.321  | 0.800935208 |
| rbp2a           | CO356149 | 1.066  | 0.743654556 |
| si:dkey-71p21.9 | CO356152 | -0.331 | 0.945496623 |
| sdc2            | CO356169 | -0.14  | 0.999867629 |
| dedd1           | CO356179 | 0.061  | 0.999867629 |
| rf32            | CO355169 | -0.063 | 0.999867629 |
| LOC100537045    | CO355205 | 0.18   | 0.999867629 |

|                   |          |        |             |
|-------------------|----------|--------|-------------|
| zgc:56419         | CO355357 | -0.316 | 0.999867629 |
| umps              | CO355426 | 0.365  | 0.603257592 |
| LOC795192         | CO355472 | 0.299  | 0.999867629 |
| mtpn              | CO355478 | 0.145  | 0.999867629 |
| nap111            | CO355704 | 0.153  | 0.999867629 |
| lyz               | CO355823 | 0.419  | 0.999867629 |
| LOC553366         | CO356182 | -0.124 | 0.999867629 |
| zgc:110380        | CO356194 | 0.071  | 0.999867629 |
| fam177a1          | CO356208 | -0.316 | 0.762113491 |
| insl3             | CO356213 | 0.072  | 0.999867629 |
| LOC100330218      | CO356232 | 0.052  | 0.999867629 |
| tmem127           | CO356251 | -0.105 | 0.999867629 |
| hsd11b2           | CO356253 | 0.236  | 0.99124371  |
| si:dkey-42i9.10   | CO356262 | 0.304  | 0.84699145  |
| si:ch211-215c18.4 | CO356274 | -0.116 | 0.999867629 |
| NA                | CO356277 | 0.151  | 0.999867629 |
| myl6              | CO356285 | -0.796 | 0.380006383 |
| uqcrc2a           | CO356286 | -0.24  | 0.952614086 |
| LOC561889         | CO356292 | 0.225  | 0.960943871 |
| NA                | CO356294 | 0.059  | 0.999867629 |
| LOC100537859      | CO356303 | 0.585  | 0.895539927 |
| zgc:64161         | CO356342 | -0.042 | 0.999867629 |
| msh2              | CO356357 | 0.239  | 0.895539927 |
| tbp11             | CO356368 | -0.068 | 0.999867629 |
| cse11             | CO356400 | 0.17   | 0.999867629 |
| si:dkey-211e20.8  | CO356401 | 0.209  | 0.826191504 |
| uba2              | CO356417 | 0.432  | 0.286845079 |
| NA                | CO356440 | 0.099  | 0.999867629 |
| zgc:63660         | CO356457 | -0.207 | 0.999867629 |
| fam86a            | EV854686 | -0.042 | 0.999867629 |
| LOC569113         | EV854690 | 0.105  | 0.999867629 |
| zgc:171719        | EV854711 | -0.097 | 0.999867629 |
| cdbl              | EV854727 | -0.037 | 0.999867629 |
| dhrs11b           | EV562731 | -0.35  | 0.967399885 |
| coro1ca           | EV562737 | 0.374  | 0.709698843 |
| fam107b           | EV562740 | 0.069  | 0.999867629 |
| LOC100005937      | EV562757 | -0.106 | 0.999867629 |
| nr1h5             | EV562770 | 0.056  | 0.999867629 |
| tpd52             | EV562790 | 0.355  | 0.844970049 |
| lxn               | EV562836 | -0.573 | 0.869878621 |
| zgc:103534        | EV562844 | 0.039  | 0.999867629 |
| si:dkey-4e7.3     | EV562845 | 0.452  | 0.673991366 |
| arpc1b            | EV562855 | 0.254  | 0.999867629 |



|              |          |        |             |
|--------------|----------|--------|-------------|
| hmgal1a      | EV562863 | -0.004 | 0.999867629 |
| arrdc3b      | EV562866 | 0.205  | 0.991938187 |
| dhrr9        | EV562872 | -0.776 | 0.896180358 |
| tp73         | EV562892 | -0.152 | 0.999867629 |
| LOC100537212 | EV562895 | -0.222 | 0.999867629 |
| chst1        | EV562919 | -0.443 | 0.480400073 |
| NA           | EV562942 | -0.014 | 0.999867629 |
| NA           | EV562960 | -0.206 | 0.999867629 |
| NA           | EV562968 | -0.266 | 0.895539927 |
| NA           | EV562983 | 0.181  | 0.999867629 |
| zgc:92201    | EV562985 | -0.309 | 0.665661454 |
| LOC100537801 | EV562999 | 0.14   | 0.999867629 |
| ctdsp12a     | EV563012 | -0.074 | 0.999867629 |
| cebpd        | EV563016 | -0.055 | 0.999867629 |
| NA           | EV563019 | 0.208  | 0.999867629 |
| NA           | EV563027 | 0.345  | 0.999867629 |
| lemd3        | EV563028 | 0.025  | 0.999867629 |
| pppde1       | EV563037 | 0.004  | 0.999867629 |
| ogdh         | EV563055 | -0.048 | 0.999867629 |
| dkk3         | EV563068 | -0.026 | 0.999867629 |
| zgc:154125   | EV563087 | -0.221 | 0.995966938 |
| obfc2ab      | EV563104 | -0.411 | 0.234026524 |
| pla2g15      | EV563105 | 0.173  | 0.999867629 |
| LOC100330285 | EV563204 | 0.365  | 0.795013911 |
| NA           | EV563224 | -0.084 | 0.999867629 |
| calua        | EV563240 | 0.165  | 0.999867629 |
| myoz2a       | EV563250 | -0.004 | 0.999867629 |
| LOC100538311 | EV563252 | -0.156 | 0.999867629 |
| cep5711      | EV563307 | 0.137  | 0.999867629 |
| EIF4G2B      | EV563319 | 0.009  | 0.999867629 |
| LOC100331428 | EV563321 | 0.189  | 0.999867629 |
| zgc:92763    | EV563334 | -0.507 | 0.370538846 |
| dpp7         | EV563341 | 0.009  | 0.999867629 |
| LOC100535949 | EV563350 | 0.579  | 0.920350122 |
| cotl1        | EV563396 | -0.101 | 0.999867629 |
| zgc:110340   | EV563455 | -0.156 | 0.999867629 |
| calr12       | EV563475 | 0.191  | 0.991938187 |
| zgc:101819   | EV563526 | 0.103  | 0.999867629 |
| slc25a12     | EV563548 | 0.171  | 0.999867629 |
| tdrd7        | EV563554 | -0.004 | 0.999867629 |
| LOC100000294 | EV563564 | 0.389  | 0.984411008 |
| NA           | EV563589 | 0.177  | 0.999867629 |
| etnk1        | EV563627 | -0.306 | 0.999867629 |

|                  |          |        |             |
|------------------|----------|--------|-------------|
| LOC100535291     | EV563649 | 0.514  | 0.999867629 |
| LOC795071        | EV563654 | 0.053  | 0.999867629 |
| spc25            | EV563681 | -0.241 | 0.895985288 |
| NA               | EV563687 | 0.094  | 0.999867629 |
| LOC100535808     | EV563710 | -0.927 | 0.539675992 |
| ik:tdsubc_1b12   | EV563715 | 0.248  | 0.999867629 |
| NA               | EV563719 | -0.473 | 0.787139253 |
| zgc:77517        | EV563744 | 0.017  | 0.999867629 |
| NA               | EV563810 | 0.083  | 0.999867629 |
| papolb           | EV563819 | -0.048 | 0.999867629 |
| cep70            | EV563849 | -0.108 | 0.999867629 |
| LOC100334245     | EV563869 | -0.097 | 0.999867629 |
| si:dkey-250l23.2 | EV563915 | 0.265  | 0.999867629 |
| si:dkeyp-73d8.6  | EV563926 | 0.509  | 0.999867629 |
| NA               | EV563929 | 0.082  | 0.999867629 |
| NA               | EV563945 | -0.078 | 0.999867629 |
| NA               | EV563947 | 0.262  | 0.896180358 |
| zgc:56066        | EV563951 | -0.038 | 0.999867629 |
| wu:fb81f11       | EV564034 | -0.046 | 0.999867629 |
| si:ch211-89f7.4  | EV564046 | 0.043  | 0.999867629 |
| exosc2           | EV564052 | -0.275 | 0.926212343 |
| gins3            | EV564065 | -0.186 | 0.999867629 |
| krcp             | EV564068 | -0.146 | 0.999867629 |
| LOC100537338     | EV564099 | 0.708  | 0.089026408 |
| LOC100302390     | EV564118 | 0.004  | 0.999867629 |
| NA               | EV564124 | 0.158  | 0.999867629 |
| zgc:109986       | EV564130 | 0.1    | 0.999867629 |
| dars             | EV564137 | -0.085 | 0.999867629 |
| LOC555163        | EV564157 | 0.041  | 0.999867629 |
| NA               | EV564207 | 0.118  | 0.999867629 |
| tm7sf2           | EV564219 | 0.008  | 0.999867629 |
| cyth1            | EV564227 | 0.233  | 0.999867629 |
| slc25a36a        | EV564246 | -0.046 | 0.999867629 |
| akr1a1a          | EV564263 | 0.326  | 0.999867629 |
| mfap2            | EV564271 | -0.028 | 0.999867629 |
| rasgef1bb        | EV564284 | 0.071  | 0.999867629 |
| znhit1           | EV564286 | 0.168  | 0.991938187 |
| zgc:103594       | EV564292 | 0.302  | 0.999867629 |
| gpib             | EV564297 | -0.337 | 0.991938187 |
| zgc:103585       | EV564304 | -0.122 | 0.999867629 |
| ccng2            | EV564343 | 0.002  | 0.999867629 |
| LOC567610        | EV564345 | -0.128 | 0.999867629 |
| LOC561662        | EV564439 | 0.114  | 0.999867629 |

|                   |          |        |             |
|-------------------|----------|--------|-------------|
| si:ch73-289a15.2  | EV564462 | -0.086 | 0.999867629 |
| LOC100330312      | EV564479 | 0.381  | 0.991938187 |
| ska3              | EW680229 | -0.224 | 0.991938187 |
| katnal2           | EV564486 | -0.113 | 0.999867629 |
| mcm3ap            | EV564494 | -0.653 | 0.999867629 |
| blvrb             | EV564504 | 0.032  | 0.999867629 |
| zgc:136474        | EV564515 | -0.102 | 0.999867629 |
| gpx4a             | EV564524 | 0.076  | 0.999867629 |
| LOC100331748      | EV564551 | -0.184 | 0.999867629 |
| prdx1             | EV564608 | -0.181 | 0.999867629 |
| phactr4a          | EV564609 | 0.215  | 0.872516471 |
| LOC799918         | EV564657 | -0.044 | 0.999867629 |
| ppp1r1c           | EV564659 | 0.159  | 0.999867629 |
| si:ch211-197n10.2 | EV564675 | 0.014  | 0.999867629 |
| abcc5             | EV564698 | 0.007  | 0.999867629 |
| mcm4              | EV564706 | 0.207  | 0.999867629 |
| selt1b            | EV564711 | 0.116  | 0.999867629 |
| ccng2             | EV564722 | -0.012 | 0.999867629 |
| LOC100536178      | EV564750 | -0.114 | 0.999867629 |
| zgc:77041         | EV564761 | 0.12   | 0.999867629 |
| zgc:175264        | EV564783 | -0.102 | 0.999867629 |
| NA                | EV564805 | 0.056  | 0.999867629 |
| NA                | EV564843 | 0.001  | 0.999867629 |
| LOC572121         | EV564859 | 0.321  | 0.994231139 |
| zgc:162576        | EV564862 | 0.302  | 0.999867629 |
| anxa1a            | EV564897 | -0.333 | 0.999867629 |
| si:ch211-203b8.3  | EV564899 | 0.201  | 0.943103959 |
| zgc:64161         | EV564961 | 0.097  | 0.999867629 |
| polr2eb           | EV564969 | 0.095  | 0.999867629 |
| asmtl             | EV564972 | 0.398  | 0.5837736   |
| nfr               | EV565012 | -0.081 | 0.999867629 |
| NA                | EV565045 | 0.032  | 0.999867629 |
| zgc:100811        | EV565057 | -0.128 | 0.999867629 |
| zgc:174506        | EV565091 | 0.163  | 0.999867629 |
| zgc:112315        | EV565098 | -0.138 | 0.999867629 |
| zwilch            | EV565102 | 0.246  | 0.9064934   |
| tdrd7             | EV565152 | 0.036  | 0.999867629 |
| suv39h1b          | EV854404 | 0.162  | 0.999867629 |
| tram2             | EV854406 | -0.108 | 0.999867629 |
| EIF3JA            | EV854425 | 0.137  | 0.999867629 |
| ANAPC5            | CO350287 | -0.091 | 0.999867629 |
| HSPA5             | CO350325 | 0.024  | 0.999867629 |
| GALE              | CO350342 | 0.097  | 0.999867629 |

|                  |          |        |             |
|------------------|----------|--------|-------------|
| si:ch211-266i6.3 | CO350508 | 0.012  | 0.999867629 |
| ddx41            | CO350632 | -0.408 | 0.373668752 |
| ranbp1           | CO350633 | 0.08   | 0.999867629 |
| zgc:158363       | CO351219 | 0.425  | 0.896180358 |
| c1d              | CO351237 | -0.178 | 0.999867629 |
| LOC797855        | CO351351 | 0.343  | 0.896180358 |
| srsf6a           | CO351471 | 0.001  | 0.999867629 |
| myh9a            | CO351476 | 0.476  | 0.823003105 |
| dynll1           | CO351562 | 0.011  | 0.999867629 |
| zgc:193933       | CO351641 | 0.237  | 0.999867629 |
| cx43.4           | CO351666 | 0.463  | 0.762908825 |
| NA               | CO351682 | -0.018 | 0.999867629 |
| mareksb          | CO351683 | -0.081 | 0.999867629 |
| LOC100536840     | CO351688 | -0.564 | 0.91123529  |
| zgc:136338       | CO351704 | -0.139 | 0.999867629 |
| map2k4b          | CO351708 | -0.299 | 0.801861783 |
| sybu             | CO351745 | 0.252  | 0.999867629 |
| si:dkeyp-114g9.1 | CO351761 | -0.053 | 0.999867629 |
| haus1            | EV854438 | -0.131 | 0.999867629 |
| zgc:55781        | EV854454 | 0.217  | 0.973057654 |
| zgc:86598        | EV854475 | -0.162 | 0.999867629 |
| EIF4G2A          | EV854489 | 0.108  | 0.999867629 |
| LOC100536776     | CO352746 | -0.199 | 0.999867629 |
| NA               | EV854507 | -0.173 | 0.999867629 |
| npdc1            | EV854514 | -0.313 | 0.956595287 |
| LOC100534876     | EV854527 | 0.159  | 0.999867629 |
| NA               | CO352780 | 0.104  | 0.999867629 |
| akt2l            | EV854539 | -0.083 | 0.999867629 |
| ccdc65           | CO352979 | 0.227  | 0.875603927 |
| LOC100151050     | EV854551 | -0.037 | 0.999867629 |
| nhp2l1           | EV854552 | -0.064 | 0.999867629 |
| LOC100330652     | EV854561 | 0.209  | 0.999867629 |
| nrxn1b           | CO353129 | 0.627  | 0.178467036 |
| tsc22d3          | EV854578 | 0.163  | 0.999867629 |
| prmt10           | EV854625 | 0.364  | 0.593902327 |
| dkk3             | EV854629 | -0.095 | 0.999867629 |
| zgc:112265       | CO353250 | 0.022  | 0.999867629 |
| NA               | CO353251 | 0.034  | 0.999867629 |
| NA               | CO353256 | -0.201 | 0.999867629 |
| si:ch211-93f2.1  | CO353280 | 0.019  | 0.999867629 |
| NA               | CO353290 | -0.248 | 0.991938187 |
| NA               | CO353295 | -0.319 | 0.941642554 |
| traf1            | CO353310 | -0.38  | 0.727961378 |

|                  |          |        |             |
|------------------|----------|--------|-------------|
| si:ch211-1n9.7   | CO353321 | -0.29  | 0.963377368 |
| gpd1b            | CO353353 | 0.047  | 0.999867629 |
| si:ch211-272f3.4 | CO353370 | 0.105  | 0.999867629 |
| NA               | CO353374 | 0.035  | 0.999867629 |
| zgc:123269       | CO353376 | -0.38  | 0.900973145 |
| NA               | CO353394 | -0.334 | 0.994231139 |
| aldh1a2          | CO353562 | -0.224 | 0.999867629 |
| mkrn4            | CO353771 | -0.016 | 0.999867629 |
| ccni             | CO353963 | -0.23  | 0.999867629 |
| gtf2a1           | CO354110 | -0.385 | 0.644961123 |
| ces2             | CO354240 | 0.427  | 0.999867629 |
| LOC100148221     | CO354304 | -0.276 | 0.68467567  |
| LOC100534948     | CO354573 | -0.267 | 0.999867629 |
| NA               | EV555200 | -0.361 | 0.773606448 |
| LOC567594        | EV555201 | 0.007  | 0.999867629 |
| mrpl14           | EV555213 | -0.042 | 0.999867629 |
| ublcp1           | EV555235 | 0.011  | 0.999867629 |
| sub1             | EV555259 | 0.117  | 0.999867629 |
| pck2             | EV555265 | 0.072  | 0.999867629 |
| zgc:152965       | EV555280 | -0.16  | 0.915413325 |
| spon1b           | EV555281 | -0.091 | 0.999867629 |
| efhd2            | EV555286 | -0.204 | 0.999867629 |
| arhgap10         | EV555302 | 0.138  | 0.999867629 |
| dus4l            | EV555312 | -0.272 | 0.872516471 |
| nsmce4a          | EV555316 | -0.093 | 0.999867629 |
| NA               | EV555342 | -0.026 | 0.999867629 |
| ctnnb2           | EV555350 | 0.164  | 0.999867629 |
| zgc:92066        | EV555399 | -0.047 | 0.999867629 |
| net1             | EV555400 | -0.076 | 0.999867629 |
| lygl1            | EV555402 | -0.273 | 0.999867629 |
| NA               | EV555404 | 0.122  | 0.999867629 |
| LOC561790        | EV555409 | -0.247 | 0.999867629 |
| nrxn1b           | EV555435 | 0.131  | 0.999867629 |
| pabpc1l          | EV555460 | -0.061 | 0.999867629 |
| NA               | EV555474 | 0.085  | 0.999867629 |
| tbeta-a          | EV555485 | -0.353 | 0.999867629 |
| rpl36a           | EV555494 | -0.04  | 0.999867629 |
| rnaseh1          | EV555500 | -0.138 | 0.999867629 |
| zgc:73142        | EV555530 | 0.287  | 0.999867629 |
| zgc:56200        | EV555588 | 0.188  | 0.999867629 |
| aldh3d1          | EV555603 | 0.035  | 0.999867629 |
| zgc:110584       | EV555611 | 0.001  | 0.999867629 |
| zgc:56676        | EV555614 | 0.076  | 0.999867629 |

|                  |          |        |             |
|------------------|----------|--------|-------------|
| ppmlg            | EV555620 | 0.04   | 0.999867629 |
| isoc2            | EV555656 | -0.106 | 0.999867629 |
| LOC100333064     | EV555662 | 0.094  | 0.999867629 |
| gmn              | EV555666 | -0.259 | 0.994231139 |
| pgrmc1           | EV555678 | -0.11  | 0.999867629 |
| si:dkey-51e6.1   | EV555700 | -0.007 | 0.999867629 |
| LOC100000332     | EV555701 | -0.706 | 0.203971339 |
| LOC100538113     | EV555710 | 0.712  | 0.580061207 |
| NA               | EV555716 | 0.031  | 0.999867629 |
| ppp1r7           | EV555726 | -0.012 | 0.999867629 |
| NA               | EV555752 | 0.229  | 0.999867629 |
| zplxdc2          | EV555791 | -0.126 | 0.999867629 |
| hspd1            | EV555803 | 0.283  | 0.776613145 |
| NA               | EV555808 | -0.379 | 0.763138748 |
| zgc:92744        | EV555822 | -0.012 | 0.999867629 |
| pgam1a           | EV555825 | -0.076 | 0.999867629 |
| zgc:154068       | EV555827 | -0.124 | 0.999867629 |
| NA               | EV555828 | 0.119  | 0.999867629 |
| wu:fj82b07       | EV555841 | 0.045  | 0.999867629 |
| postn            | EV555843 | -0.421 | 0.796008859 |
| cars             | EV555849 | 0.114  | 0.999867629 |
| c6               | EV555855 | -0.153 | 0.999867629 |
| rps18            | EV555858 | -0.094 | 0.999867629 |
| pdhb             | EV555923 | 0.018  | 0.999867629 |
| iqcc             | EV555926 | -0.216 | 0.896180358 |
| si:ch211-210c8.7 | EV555942 | -0.1   | 0.999867629 |
| NA               | EV555949 | 0.545  | 0.902634316 |
| ints3            | EV555963 | 0.25   | 0.991938187 |
| qars             | EV555995 | 0.021  | 0.999867629 |
| NA               | EV555996 | -0.196 | 0.991938187 |
| LOC100332626     | EV556004 | -0.176 | 0.999867629 |
| LOC100536370     | EV556023 | 0.335  | 0.991938187 |
| zgc:56072        | EV556032 | -0.127 | 0.999867629 |
| stmn1a           | EV556035 | -0.052 | 0.999867629 |
| rpl10            | EV556040 | -0.156 | 0.999867629 |
| NA               | EV556059 | -0.125 | 0.999867629 |
| NA               | EV556084 | -0.006 | 0.999867629 |
| NA               | EV556107 | -0.022 | 0.999867629 |
| zgc:152851       | EV556108 | 0.162  | 0.999867629 |
| zgc:114041       | EV556109 | -0.049 | 0.999867629 |
| ints12           | EV556117 | 0.362  | 0.999867629 |
| atic             | EV556151 | -0.089 | 0.999867629 |
| wu:fj39b01       | EV556172 | 0.049  | 0.999867629 |

|                   |          |        |             |
|-------------------|----------|--------|-------------|
| cat               | EV556193 | 0.264  | 0.999867629 |
| nsun5             | EV556197 | -0.019 | 0.999867629 |
| NA                | EV556258 | 0.017  | 0.999867629 |
| zgc:152986        | EV556284 | 0.07   | 0.999867629 |
| cnpy2             | EV556320 | -0.119 | 0.999867629 |
| zgc:55843         | EV556341 | 0.21   | 0.896180358 |
| zgc:171795        | EV556373 | 0.107  | 0.999867629 |
| NA                | EV556413 | -0.153 | 0.999867629 |
| NA                | EV556418 | 0.073  | 0.999867629 |
| tefa              | EV556419 | 0.934  | 0.0238853   |
| NA                | EV556427 | -0.025 | 0.999867629 |
| s100a1            | EV556428 | -0.121 | 0.999867629 |
| LOC567678         | EV556445 | -0.104 | 0.999867629 |
| lsm8              | EV556454 | -0.063 | 0.999867629 |
| ptgr1             | EV556456 | 0.13   | 0.999867629 |
| NA                | EV556473 | 0.051  | 0.999867629 |
| EIF3S6IP          | EV556478 | -0.134 | 0.999867629 |
| si:ch211-236114.3 | EV556489 | -0.046 | 0.999867629 |
| ap1g1             | EV556527 | 0.038  | 0.999867629 |
| tceb1a            | EV556528 | -0.209 | 0.902634316 |
| ccdc58            | EV556586 | 0.147  | 0.999867629 |
| NA                | EV556599 | 0.119  | 0.999867629 |
| si:ch211-203b8.5  | EV556608 | 0.635  | 0.896180358 |
| LOC100535842      | EV556631 | -0.051 | 0.999867629 |
| LOC100334599      | EV556646 | -0.823 | 0.68467567  |
| NA                | EV556726 | 0.324  | 0.650957948 |
| EIF4E             | EV556736 | -0.06  | 0.999867629 |
| IARS              | EV556757 | -0.154 | 0.999867629 |
| zgc:101016        | EV556770 | -0.074 | 0.999867629 |
| tmem144b          | EV556857 | -0.222 | 0.896180358 |
| zgc:66449         | EV556911 | 0.17   | 0.999867629 |
| bud31             | EV557026 | 0.097  | 0.999867629 |
| stxbp3            | EV557060 | 2.404  | 0.110515806 |
| NA                | EV557061 | -0.075 | 0.999867629 |
| NA                | EV557065 | -0.012 | 0.999867629 |
| si:ch211-105d11.3 | EV557072 | 0.05   | 0.999867629 |
| pa2g4a            | EV557095 | -0.31  | 0.796008859 |
| brip1             | EV557097 | 0.046  | 0.999867629 |
| zgc:123274        | EV557098 | 0.038  | 0.999867629 |
| NA                | EV557113 | 0.221  | 0.969284962 |
| fli1b             | EV557134 | 0.097  | 0.999867629 |
| nmt1a             | EV557137 | -0.025 | 0.999867629 |
| NA                | EV557152 | 0.01   | 0.999867629 |

|                   |          |        |             |
|-------------------|----------|--------|-------------|
| NA                | EV557153 | -0.329 | 0.684545685 |
| NA                | EV557155 | 0.143  | 0.999867629 |
| LOC100333953      | EV557161 | 0.019  | 0.999867629 |
| NA                | EV557166 | -0.047 | 0.999867629 |
| NA                | EV557179 | 0.271  | 0.653709814 |
| slc39a7           | EV557180 | 0.157  | 0.982794529 |
| LOC100535417      | EV557277 | -0.031 | 0.999867629 |
| NA                | EV557291 | 0.098  | 0.999867629 |
| sumo3a            | EV557294 | -0.258 | 0.99124371  |
| si:dkey-90l23.1   | EV557304 | -0.662 | 0.115148473 |
| sc:d808           | EV557326 | -0.107 | 0.999867629 |
| si:dkey-26lh17.1  | EV557366 | 0.02   | 0.999867629 |
| ide               | EV557410 | 0.027  | 0.999867629 |
| LOC100537670      | EV557415 | -0.184 | 0.999867629 |
| si:ch211-214p16.1 | EV557421 | -0.095 | 0.999867629 |
| ldlrp1a           | EV557427 | 0.268  | 0.692167093 |
| bnip3lb           | EV557432 | 0.039  | 0.999867629 |
| zgc:161973        | EV557457 | 0.221  | 0.999867629 |
| bactin2           | CO353568 | -0.395 | 0.991938187 |
| LOC100334473      | EV557552 | -0.071 | 0.999867629 |
| LOC798352         | EV557593 | -0.16  | 0.999867629 |
| NA                | EV557618 | 0.097  | 0.999867629 |
| zgc:103482        | EV557619 | -0.309 | 0.665661454 |
| pus3              | EV557625 | -0.492 | 0.171867871 |
| si:busm1-118j2.5  | EV557639 | -0.502 | 0.999867629 |
| zgc:152968        | EV557648 | 0.406  | 0.743074638 |
| si:ch211-155k24.6 | EV557650 | -0.23  | 0.999867629 |
| plk1              | EV557668 | 0.085  | 0.999867629 |
| gins2             | EV557676 | -0.21  | 0.999867629 |
| ing2              | EV557692 | 0.195  | 0.943103959 |
| dnd               | EV557789 | -0.149 | 0.999867629 |
| zgc:110788        | EV557790 | -0.285 | 0.982903264 |
| dnd               | EV557793 | -0.299 | 0.896180358 |
| zgc:103482        | EV557820 | 0.112  | 0.999867629 |
| rcc1              | EV557822 | 0.059  | 0.999867629 |
| zgc:154067        | EV557840 | 0.021  | 0.999867629 |
| cisd1             | EV557867 | 0.307  | 0.999867629 |
| plxnd1            | EV557879 | 0.043  | 0.999867629 |
| zgc:55395         | EV557888 | 0.247  | 0.99124371  |
| zgc:92417         | EV557916 | 0.158  | 0.999867629 |
| zgc:77714         | EV557923 | -0.187 | 0.999867629 |
| LOC559576         | EV557932 | -0.041 | 0.999867629 |
| zgc:56280         | EV557937 | 0.243  | 0.999867629 |



|                   |          |        |             |
|-------------------|----------|--------|-------------|
| NA                | EV557992 | -0.061 | 0.999867629 |
| coll1a2           | EV557996 | -0.956 | 0.684545685 |
| LOC407698         | EV558016 | -0.721 | 0.743654556 |
| LOC100003370      | EV558037 | 0.277  | 0.838306978 |
| pdk2              | EV558064 | -0.017 | 0.999867629 |
| NA                | EV558066 | -0.034 | 0.999867629 |
| NA                | EV558075 | -0.201 | 0.999867629 |
| NA                | EV558093 | -0.268 | 0.831263973 |
| NA                | EV558117 | 0.09   | 0.999867629 |
| LOC100535213      | EV558133 | -0.345 | 0.708947213 |
| si:ch211-155k24.6 | EV558187 | -0.487 | 0.614878955 |
| NA                | EV558188 | 0.113  | 0.999867629 |
| hbbe2             | EV558198 | -0.461 | 0.999867629 |
| anxa11b           | EV558201 | 0.242  | 0.984719777 |
| mrps6             | EV558207 | -0.06  | 0.999867629 |
| cdc45             | EV558232 | 0.269  | 0.773606448 |
| dnmt1             | EV558233 | -0.091 | 0.999867629 |
| LOC100006925      | EV558235 | 0.236  | 0.999867629 |
| bcam              | EV558251 | -0.004 | 0.999867629 |
| cyc1              | EV558255 | -0.343 | 0.999867629 |
| dynll2a           | EV558258 | 0.028  | 0.999867629 |
| gbgt114           | EV558285 | 0.015  | 0.999867629 |
| cxxc1             | EV558288 | 0.071  | 0.999867629 |
| rrm2              | EV558295 | -0.2   | 0.999867629 |
| NA                | EV558323 | 0.126  | 0.999867629 |
| NA                | EV558325 | -0.303 | 0.999867629 |
| zgc:158852        | EV558329 | 0.032  | 0.999867629 |
| zgc:123178        | EV558359 | 0.055  | 0.999867629 |
| LOC100002476      | EV558365 | -0.561 | 0.943103959 |
| adipor2           | EV558384 | -0.049 | 0.999867629 |
| LOC100334424      | EV558447 | 0.155  | 0.999867629 |
| si:dkey-42i9.8    | EV558455 | -0.078 | 0.999867629 |
| pepd              | EV558463 | -0.131 | 0.999867629 |
| phf23a            | EV558485 | 0.037  | 0.999867629 |
| thoc3             | EV558494 | 0.022  | 0.999867629 |
| cfl1              | EV558517 | 0.289  | 0.796008859 |
| si:dkey-273o13.2  | EV558534 | 0.016  | 0.999867629 |
| anp32b            | EV558558 | -0.125 | 0.999867629 |
| LOC100333174      | EV558564 | 0.129  | 0.999867629 |
| hmgb2a            | EV558567 | 0.209  | 0.999867629 |
| LOC100536708      | EV558573 | 0.076  | 0.999867629 |
| zgc:152928        | EV558579 | 0.323  | 0.898523837 |
| eml2              | EV558608 | -0.36  | 0.697973671 |

|                   |          |        |             |
|-------------------|----------|--------|-------------|
| fbxo11-like       | EV558622 | 0.148  | 0.999867629 |
| NA                | EV558642 | -0.546 | 0.872516471 |
| LOC100536529      | EV558643 | 0.239  | 0.994231139 |
| bactin2           | CO353568 | -0.299 | 0.999867629 |
| rpl9              | EV558749 | -0.098 | 0.999867629 |
| si:dkey-276i5.1   | EV558750 | 0.288  | 0.87805354  |
| NA                | EV558789 | 0.057  | 0.999867629 |
| dab2              | EV558797 | 0.322  | 0.999867629 |
| si:dkey-192o1.2   | EV558802 | -0.462 | 0.537478773 |
| sart3             | EV558814 | 0.047  | 0.999867629 |
| zgc:56231         | EV558847 | 0.233  | 0.999867629 |
| zgc:153377        | EV558849 | -0.231 | 0.999867629 |
| wu:fi42e03        | EV558866 | 0.018  | 0.999867629 |
| NA                | EV558909 | -0.005 | 0.999867629 |
| snrpd1            | EV558979 | -0.295 | 0.943103959 |
| NA                | EV559006 | 0.086  | 0.999867629 |
| elovl6l           | EV559028 | -0.083 | 0.999867629 |
| alg14             | EV559103 | -0.32  | 0.907896464 |
| pold2             | EV559135 | -0.555 | 0.171469472 |
| brd2a             | EV559139 | -0.438 | 0.787139253 |
| tbcl              | EV559154 | 0.036  | 0.999867629 |
| aldh6a1           | EV559178 | -0.135 | 0.999867629 |
| zgc:173742        | EV559186 | -0.036 | 0.999867629 |
| NA                | EV559189 | -0.017 | 0.999867629 |
| ctbp1             | EV559237 | -0.371 | 0.991938187 |
| LOC100536831      | EV559254 | 0.094  | 0.999867629 |
| si:ch211-191i18.1 | EV559286 | -0.046 | 0.999867629 |
| zgc:55888         | EV559300 | -0.359 | 0.673991366 |
| zgc:161973        | EV559301 | 0.283  | 0.999867629 |
| si:ch211-67e16.9  | EV559306 | 0.005  | 0.999867629 |
| si:ch211-239e6.4  | EV559308 | -0.693 | 0.241733546 |
| wwp2              | EV559318 | -0.488 | 0.373668752 |
| actn3b            | EV559325 | -0.059 | 0.999867629 |
| LOC556026         | EV559355 | -0.389 | 0.80260793  |
| rrm1              | EV559365 | 0.164  | 0.999867629 |
| fgfr11b           | EV559378 | -0.634 | 0.763138748 |
| LOC100002916      | EV559386 | -0.06  | 0.999867629 |
| zar1              | EV559391 | -0.166 | 0.999867629 |
| zgc:55877         | EV559435 | -0.043 | 0.999867629 |
| wu:fe05a04        | EV559443 | 0.007  | 0.999867629 |
| rsl24d1           | EV559467 | -0.213 | 0.999867629 |
| pgp               | EV559495 | -0.028 | 0.999867629 |
| ttc32             | EV559596 | -0.324 | 0.758506216 |

|                  |          |        |             |
|------------------|----------|--------|-------------|
| LOC100537729     | EV559599 | 0.164  | 0.999867629 |
| si:dkey-14d8.1   | EV559630 | 0.033  | 0.999867629 |
| prps1a           | EV559655 | 0.054  | 0.999867629 |
| cdkn3            | EV559715 | -0.294 | 0.526063265 |
| tipin            | EV559743 | -0.207 | 0.971667518 |
| lamp2            | EV559754 | -0.069 | 0.999867629 |
| fabp3            | EV559759 | 0.32   | 0.999867629 |
| NA               | EV559766 | 0.4    | 0.999867629 |
| zgc:158856       | EV559775 | -0.329 | 0.895539927 |
| LOC100535847     | EV559795 | -0.004 | 0.999867629 |
| LOC799904        | EV559816 | -0.171 | 0.999867629 |
| eme1             | EV559873 | 0.049  | 0.999867629 |
| NA               | EV559887 | -0.009 | 0.999867629 |
| gpr160           | EV559910 | -0.167 | 0.999867629 |
| LOC792919        | EV560017 | -0.739 | 0.393009716 |
| rac1             | EV560028 | -0.194 | 0.999867629 |
| slc16a3          | EV560034 | 0.123  | 0.999867629 |
| lamp2            | EV560047 | -0.081 | 0.999867629 |
| ccnh             | EV560100 | -0.05  | 0.999867629 |
| zgc:113293       | EV560102 | -0.078 | 0.999867629 |
| pppde1           | EV560109 | -0.307 | 0.974898761 |
| EIF4EBP3         | EV560113 | -0.293 | 0.999867629 |
| prtfcd1          | EV560150 | -0.349 | 0.89076927  |
| NA               | EV560167 | -0.036 | 0.999867629 |
| si:ch211-51e12.7 | EV560202 | 0.22   | 0.896180358 |
| zgc:73311        | EV560206 | -0.009 | 0.999867629 |
| stau2            | EV560230 | -0.149 | 0.999867629 |
| rac1             | EV560270 | 0.073  | 0.999867629 |
| wu:fi42e03       | EV560294 | -0.203 | 0.999867629 |
| zgc:63938        | EV560342 | 0.173  | 0.999867629 |
| zgc:113200       | EV560398 | 0.192  | 0.999867629 |
| NA               | EV560403 | -0.025 | 0.999867629 |
| gfer             | EV560439 | -0.243 | 0.911946177 |
| zgc:77112        | EV560453 | 0.175  | 0.999867629 |
| clu              | EV560454 | -0.085 | 0.999867629 |
| LOC569642        | EV560472 | -0.528 | 0.711575577 |
| LOC100537662     | EV560480 | -0.203 | 0.994231139 |
| zgc:171779       | EV560504 | -0.252 | 0.999867629 |
| EIF4ENIF1        | EV560519 | 0.114  | 0.999867629 |
| zgc:86764        | EV560550 | -0.142 | 0.999867629 |
| acaa2            | EV560564 | 0.283  | 0.963377368 |
| fmn2b            | EV560613 | -0.074 | 0.999867629 |
| fdx1             | EV560623 | -0.169 | 0.999867629 |

|              |          |        |             |
|--------------|----------|--------|-------------|
| serf2        | EV560626 | -0.085 | 0.999867629 |
| ddx6         | EV560633 | -0.158 | 0.999867629 |
| pdc11        | EV560657 | 0.505  | 0.967399885 |
| tph1a        | EV560659 | -0.05  | 0.999867629 |
| zgc:55781    | EV560688 | 0.217  | 0.999867629 |
| zgc:162200   | EV560692 | 0.277  | 0.999867629 |
| mcf2a        | EV560708 | -0.546 | 0.353212317 |
| mxra8a       | EV560738 | -0.282 | 0.999867629 |
| zgc:153393   | EV560834 | -0.361 | 0.531103056 |
| nsa2         | EV560860 | -0.095 | 0.999867629 |
| LOC100147955 | EV560914 | -0.277 | 0.763632818 |
| h2afv        | EV560934 | -0.421 | 0.437650454 |
| NA           | EV560955 | -0.556 | 0.521567026 |
| zgc:73187    | EV560958 | -0.104 | 0.999867629 |
| ndufa8       | EV560966 | 0.169  | 0.999867629 |
| LOC100535315 | EV560990 | -0.057 | 0.999867629 |
| LOC798927    | EV560997 | -0.573 | 0.579418258 |
| prpsap2      | EV561045 | 0.232  | 0.999867629 |
| dkc1         | EV561049 | 0.045  | 0.999867629 |
| LOC100538140 | EV561078 | -0.146 | 0.999867629 |
| NA           | EV561168 | 0.029  | 0.999867629 |
| ell2         | EV561207 | -0.345 | 0.83094516  |
| ggps1        | EV561212 | 0.434  | 0.686651365 |
| zgc:110307   | EV561216 | 0.074  | 0.999867629 |
| sybu         | EV561220 | -0.029 | 0.999867629 |
| NA           | EV561239 | -0.194 | 0.999867629 |
| LOC100535261 | EV561241 | -0.493 | 0.999867629 |
| rmf111       | EV561246 | 0.202  | 0.991938187 |
| ppfia3       | EV561259 | 0.02   | 0.999867629 |
| tmprss4b     | EV561274 | -0.245 | 0.895539927 |
| LOC100536069 | EV561289 | 0.469  | 0.764693722 |
| zgc:103738   | EV561303 | 0.026  | 0.999867629 |
| tram2        | EV561310 | -0.076 | 0.999867629 |
| tubb5        | EV561318 | -0.14  | 0.999867629 |
| rab35        | EV561361 | -0.079 | 0.999867629 |
| smc4         | EV561367 | -0.138 | 0.999867629 |
| wdr451       | EV561404 | 0.128  | 0.999867629 |
| NA           | EV561415 | 0.006  | 0.999867629 |
| mcm3l        | EV561418 | -0.035 | 0.999867629 |
| rpl27        | EV561475 | -0.14  | 0.999867629 |
| tram1        | EV561479 | 0.123  | 0.999867629 |
| zgc:92670    | EV561517 | -0.001 | 0.999867629 |
| rdh10b       | EV561565 | -0.382 | 0.690166619 |

|                   |          |        |             |
|-------------------|----------|--------|-------------|
| fbln5             | EV561587 | -0.149 | 0.999867629 |
| nsa2              | EV603076 | -0.262 | 0.960943871 |
| NA                | EV603090 | 0.094  | 0.999867629 |
| NA                | EV603125 | -0.098 | 0.999867629 |
| zgc:193538        | EV603174 | 0.284  | 0.773606448 |
| mrpl36            | EV603209 | 0.156  | 0.999867629 |
| zgc:158667        | EV603231 | 0.222  | 0.896180358 |
| phf5a             | EV603233 | -0.452 | 0.188466858 |
| LOC795984         | EV603237 | -0.338 | 0.999867629 |
| LOC564151         | EV603238 | 0.116  | 0.999867629 |
| srsf2             | EV603246 | 0.176  | 0.999867629 |
| LOC100535971      | EV603252 | -0.624 | 0.285409963 |
| atpif1            | EV603257 | 0.29   | 0.820424332 |
| NA                | EV603271 | -0.114 | 0.999867629 |
| NA                | EV603272 | 0.023  | 0.999867629 |
| adh8b             | EV603276 | 0.188  | 0.999867629 |
| sept4a            | EV603300 | 0.002  | 0.999867629 |
| fbxo22            | EV603344 | -0.268 | 0.999867629 |
| LOC796580         | EV603345 | -0.606 | 0.402438175 |
| rps2              | EV603363 | -0.429 | 0.743654556 |
| cenpa             | EV603414 | -0.262 | 0.521567026 |
| NA                | EV603423 | -0.43  | 0.668247054 |
| zcchc8            | EV603439 | -0.08  | 0.999867629 |
| LOC100002545      | EV854363 | -0.051 | 0.999867629 |
| zgc:113070        | EV603470 | 0.571  | 0.876086971 |
| cpb1              | EV603485 | 0.181  | 0.999867629 |
| h2afx             | EV854365 | -0.246 | 0.999867629 |
| hmga1a            | EV603500 | 0.06   | 0.999867629 |
| LOC100332020      | EV854368 | -0.819 | 0.787139253 |
| NA                | EV603600 | -0.057 | 0.999867629 |
| alas1             | EV603611 | -0.19  | 0.999867629 |
| cdca9             | EV603649 | -0.055 | 0.999867629 |
| LOC100535992      | EV603655 | -0.301 | 0.999867629 |
| si:ch211-173p18.2 | EV603661 | -0.321 | 0.999867629 |
| LOC100004510      | EV603662 | 0.97   | 0.085352772 |
| LOC100536377      | EV603679 | 0.038  | 0.999867629 |
| npm2              | EV603717 | 0.504  | 0.59488253  |
| si:dkey-8l13.1    | EV606518 | -0.759 | 0.125221876 |
| ccna1             | EV854371 | -0.181 | 0.999867629 |
| cldnd             | EV603732 | -0.181 | 0.999867629 |
| synj2bp           | EV603740 | 0.148  | 0.999867629 |
| LOC100535587      | EV603782 | 0.164  | 0.999867629 |
| hnmpa1            | EV603815 | 0.323  | 0.909342474 |

|                   |          |        |             |
|-------------------|----------|--------|-------------|
| LOC100334678      | EV603833 | 0.196  | 0.999867629 |
| NA                | EV603839 | -0.07  | 0.999867629 |
| g3bp1             | EV854375 | 0.053  | 0.999867629 |
| uchl1             | EV854376 | -0.17  | 0.999867629 |
| NA                | EV603867 | 0.058  | 0.999867629 |
| zgc:101565        | EV603888 | -0.207 | 0.999867629 |
| NA                | EV854377 | 0.269  | 0.999867629 |
| ncbp2             | EV603899 | 0.058  | 0.999867629 |
| vim               | EV603914 | 0.119  | 0.999867629 |
| NA                | EV603934 | -0.12  | 0.999867629 |
| zgc:86839         | EV854382 | 0.029  | 0.999867629 |
| NA                | EV854383 | 0.018  | 0.999867629 |
| NA                | EV603962 | -0.23  | 0.991938187 |
| cfl2l             | EV603981 | 0.245  | 0.999867629 |
| parn              | EV603982 | 0.171  | 0.999867629 |
| pdcd4b            | EV603993 | -0.631 | 0.645831808 |
| azin1b            | EV604024 | 0.092  | 0.999867629 |
| NA                | EV604032 | -0.149 | 0.999867629 |
| mcm10             | EV604062 | 0.026  | 0.999867629 |
| LOC564156         | EV604105 | 0.046  | 0.999867629 |
| pdgfrl            | EV604120 | -0.058 | 0.999867629 |
| LOC100537724      | EV604131 | 0.176  | 0.999867629 |
| pcna              | EV604138 | -0.276 | 0.68467567  |
| zgc:165555        | EV604162 | 0.028  | 0.999867629 |
| vcp               | EV604208 | 0.02   | 0.999867629 |
| eme1              | EV604256 | 0.162  | 0.999867629 |
| asb3              | EV604278 | -0.087 | 0.999867629 |
| NA                | EV604282 | -0.081 | 0.999867629 |
| marveld2a         | EV604286 | 0.389  | 0.708947213 |
| si:ch211-195i21.1 | EV604307 | -0.092 | 0.999867629 |
| LOC561086         | EV604312 | -0.097 | 0.999867629 |
| zgc:153362        | EV604332 | -0.214 | 0.999867629 |
| si:ch211-12e13.2  | EV606521 | 0.087  | 0.999867629 |
| rbp4              | EV604348 | 0.152  | 0.999867629 |
| LOC100002387      | EV604356 | -0.142 | 0.999867629 |
| LOC100331651      | EV604359 | 0.661  | 0.370525071 |
| ap2a1             | EV604361 | -0.453 | 0.402438175 |
| LOC568145         | EV604369 | 0.007  | 0.999867629 |
| cth1              | EV854394 | 0.16   | 0.999867629 |
| pdcd7             | EV604424 | 0.184  | 0.994231139 |
| NA                | EV604426 | -0.263 | 0.896066554 |
| zgc:123180        | EV604432 | -0.147 | 0.999867629 |
| mycl1a            | EV604462 | 0.501  | 0.754337045 |

|                  |          |        |             |
|------------------|----------|--------|-------------|
| cdca8            | EV604463 | -0.085 | 0.999867629 |
| hmmr             | EV604497 | -0.038 | 0.999867629 |
| ankrd10a         | EV604514 | -0.016 | 0.999867629 |
| bub3             | EV604520 | -0.242 | 0.994733513 |
| prc1a            | EV606523 | -0.092 | 0.999867629 |
| si:dkey-177p2.14 | EV604569 | 0.003  | 0.999867629 |
| LOC100151188     | EV604577 | 0.357  | 0.886645297 |
| cbx3a            | EV604597 | -0.106 | 0.999867629 |
| capza1b          | EV604599 | 0.013  | 0.999867629 |
| NA               | EV604605 | -0.192 | 0.999867629 |
| h1m              | EV854398 | -0.162 | 0.999867629 |
| NA               | EV604654 | 0.68   | 0.821593756 |
| zgc:122991       | EV604688 | 0.117  | 0.999867629 |
| insb             | EV604706 | -0.314 | 0.863522341 |
| ca15b            | EV604784 | -0.362 | 0.708947213 |
| zgc:77241        | EV604798 | -0.237 | 0.994733513 |
| brd2a            | EV604809 | -0.144 | 0.999867629 |
| zgc:154064       | EV604811 | 0.159  | 0.999867629 |
| ptmaa            | EV604828 | -0.077 | 0.999867629 |
| si:ch211-12e13.2 | EV604837 | 0.185  | 0.999867629 |
| LOC564674        | EV604874 | -0.448 | 0.649773044 |
| zgc:56231        | EV604907 | 0.254  | 0.999867629 |
| pkig             | EV604912 | -0.182 | 0.999867629 |
| idh2             | EV604920 | -0.038 | 0.999867629 |
| ywhabb           | EV604934 | -0.18  | 0.999867629 |
| fermt1           | EV604935 | -0.465 | 0.286845079 |
| grik1a           | EV604936 | 0.162  | 0.999867629 |
| zgc:101768       | EV604939 | -0.43  | 0.581752554 |
| fkbp1ab          | EV604955 | -0.213 | 0.994733513 |
| st8sia4          | EV604964 | -0.101 | 0.999867629 |
| LOC100537720     | EV605039 | 0.441  | 0.650957948 |
| zgc:153126       | EV605075 | 0.028  | 0.999867629 |
| buc              | EV605077 | 0.202  | 0.91869103  |
| NA               | EV605089 | 0.05   | 0.999867629 |
| dnajc2           | EV605155 | 0.113  | 0.999867629 |
| LOC569097        | EV605161 | 0.146  | 0.999867629 |
| arid3b           | EV605168 | 0.272  | 0.773606448 |
| chac1            | EV605173 | 0.376  | 0.999867629 |
| scarb1           | EV605191 | 0.179  | 0.999867629 |
| EIF3ha           | EV605274 | 0.16   | 0.999867629 |
| txlnba           | EV605277 | -0.15  | 0.999867629 |
| zgc:175195       | EV605299 | 0.231  | 0.914008513 |
| zgc:63942        | EV605340 | -0.282 | 0.994733513 |

|                   |              |          |             |             |
|-------------------|--------------|----------|-------------|-------------|
| hmg3b             | EV605347     | 0.032    | 0.999867629 |             |
| zgc:175136        | EV605351     | 0.371    | 0.764693722 |             |
| LOC100333730      | EV605366     | 0.088    | 0.999867629 |             |
| hnrnpab           | EV605399     | 0.272    | 0.999867629 |             |
| LOC100002545      | EV605409     | -0.082   | 0.999867629 |             |
| NA                | EV605447     | -0.311   | 0.801561504 |             |
| larp6             | EV605473     | -0.18    | 0.999867629 |             |
| spsb1             | EV605552     | -0.253   | 0.943103959 |             |
| si:dkey-42i9.5    | EV605594     | -0.01    | 0.999867629 |             |
| LOC792922         | EV605606     | 0.281    | 0.883513061 |             |
| si:dkeyp-26a9.2   | EV605678     | 0.014    | 0.999867629 |             |
| si:ch211-67e16.9  | EV605727     | -0.141   | 0.999867629 |             |
| LOC100149910      | EV605793     | 0.074    | 0.999867629 |             |
| NA                | EV605812     | -0.054   | 0.999867629 |             |
| LOC100537390      | EV605850     | 0.083    | 0.999867629 |             |
| mcmbp             | EV605854     | -0.175   | 0.991938187 |             |
| bcl6a             | EV605893     | -0.268   | 0.896180358 |             |
| zpcx              | EV605919     | -0.259   | 0.999867629 |             |
| NA                | EV605952     | 0.158    | 0.999867629 |             |
| NA                | EV605955     | -0.136   | 0.999867629 |             |
| si:ch211-250e5.16 | EV605962     | 0.129    | 0.999867629 |             |
| mat2a             | EV606012     | 0.464    | 0.318787487 |             |
| slc25a26          | EV606036     | -0.531   | 0.318787487 |             |
| snx10a            | EV606056     | -0.367   | 0.708947213 |             |
| NA                | EV606064     | -0.305   | 0.902634316 |             |
| NA                | EV606109     | -0.536   | 0.762113491 |             |
| NA                | EV606131     | -0.06    | 0.999867629 |             |
| NA                | EV606142     | 0.19     | 0.999867629 |             |
| zgc:92139         | EV606145     | -0.022   | 0.999867629 |             |
| uqcrc2a           | EV606155     | -0.294   | 0.605563948 |             |
| NA                | EV606168     | 0.315    | 0.999867629 |             |
| LOC100334275      | EV606173     | 0.311    | 0.999867629 |             |
| LOC797655         | EV606192     | 0.323    | 0.991938187 |             |
| tatdn2            | EV606199     | 0.155    | 0.999867629 |             |
| mrpl9             | EV606218     | -0.275   | 0.72705678  |             |
| zgc:154067        | EV606251     | 0.066    | 0.999867629 |             |
| <b>G</b>          | LOC100002043 | CO351529 | 3.822       | 0.000927681 |

\*Gene symbol information for these EST sequences was obtained based on sequence similarity to other vertebrates.

†The q-value represents the false discovery rate corrected p-value derived from the linear fit to a group means parameterization. Fold changes are log<sub>2</sub> transformed and they are shown either as treated/control or as female/male. Supplementary Figure 3 provides the key to the different sections.



**Supplementary Table 3.** List of genes that were differentially expressed in the gonads of individuals treated with high dose ( $1 \times 10^7$  CFU/ml) of heat-killed bacteria compared to expression in control females or males, respectively, based on microarray analysis.

| Section  | Gene symbol       | GenBank ID | Log2 fold change | q-value <sup>†</sup> |
|----------|-------------------|------------|------------------|----------------------|
| <b>A</b> | ell2              | CO349837   | 1.168            | 0.002126303          |
|          | NA                | CO350047   | 1.403            | 0.014217355          |
|          | rpl24             | CO353335   | 1.009            | 0.000704515          |
|          | rpl24             | CO353421   | 1.066            | 0.014705718          |
|          | NA                | CO353397   | 1.14             | 0.012558986          |
|          | si:ch211-241d21.5 | CO353431   | 1.063            | 0.02787715           |
|          | itm2bb            | CO353486   | 1.43             | 0.007201389          |
|          | calm1a            | CO350889   | 1.094            | 0.002038716          |
|          | ivd               | CO351101   | 1.003            | 0.001546809          |
|          | zgc:76887         | CO351553   | 1.261            | 0.000198842          |
|          | LOC561500         | CO354514   | 1.223            | 0.001094486          |
|          | si:ch211-15d5.5   | CO356166   | 1.005            | 0.000135376          |
|          | LOC100536320      | CO355656   | 1.193            | 0.000832309          |
|          | ddx3              | EV854707   | 1.135            | 6.09626E-06          |
|          | kiaa09471         | EV563765   | 1.003            | 0.000490033          |
|          | smc1b             | EV564536   | 1.257            | 0.002819764          |
|          | kcnj1             | EV564622   | 1.128            | 0.029032909          |
|          | pum1              | EV565039   | 1.02             | 5.69379E-05          |
|          | s1pr5a            | EV555851   | 1.003            | 0.001341451          |
|          | wu:fk48d07        | EV555950   | 1.233            | 0.002490988          |
|          | NA                | EV556282   | 1.142            | 0.00027437           |
|          | gtdc1             | EV557094   | 1.703            | 0.000197531          |
|          | LOC100003370      | EV560529   | -1.02            | 0.003435629          |
|          | ccdc69            | EV603654   | -1.198           | 0.003992417          |
| NA       | EV854370          | -1.103     | 0.008927792      |                      |
| <b>B</b> | nip7              | CO349808   | 0.215            | 0.534318581          |
|          | NA                | CO349863   | 0.374            | 0.289083501          |
|          | wu:fb54e10        | CO350338   | 0.417            | 0.217980181          |
|          | ddx39aa           | CO350372   | 0.29             | 0.402461657          |
|          | EIF2S11           | CO350550   | 0.187            | 0.585362587          |
|          | NA                | CO350801   | 0.735            | 0.023429658          |
|          | PPP1CB            | CO352706   | 0.463            | 0.065830704          |
|          | zgc:113196        | CO352716   | 0.621            | 0.034986309          |
|          | NA                | CO353057   | 0.114            | 0.85226856           |
|          | rpl35             | CO353285   | 0.411            | 0.077749154          |
|          | atp5ib            | CO353399   | 0.224            | 0.301010605          |
|          | syf2              | CO353453   | 0.143            | 0.678502519          |
|          | si:ch211-147d7.5  | CO353634   | 0.461            | 0.175388523          |

|                    |          |        |             |
|--------------------|----------|--------|-------------|
| gtf2h5             | CO353723 | 0.107  | 0.789928103 |
| nusap1             | CO353785 | 0.085  | 0.834394626 |
| wu:fc92e03         | CO353884 | -0.176 | 0.567162727 |
| ran                | CO353914 | 0.558  | 0.034496457 |
| ndufa12            | CO353954 | 0.35   | 0.119623152 |
| NA                 | CO354002 | 0.739  | 0.012558986 |
| zgc:103688         | CO354008 | 0.607  | 0.086314114 |
| piwil1             | CO354057 | 0.886  | 0.006203748 |
| fbl                | CO350875 | 0.464  | 0.073021834 |
| lsm6               | CO350880 | 0.259  | 0.493033274 |
| cox7c              | CO350908 | 0.781  | 0.006514159 |
| sfrs18             | CO350926 | 0.259  | 0.462413668 |
| atp5g              | CO351021 | 0.255  | 0.592764128 |
| mrps18b            | CO351138 | -0.193 | 0.585362587 |
| rpl23              | CO351432 | -0.088 | 0.854491047 |
| wu:fi12a09         | CO351437 | -0.062 | 0.903619834 |
| sec61b             | CO354618 | 0.336  | 0.223243197 |
| rnps1              | CO354680 | 0.081  | 0.860626455 |
| rmnd5b             | CO354781 | 0.058  | 0.93094233  |
| stmn1b             | CO354907 | -0.203 | 0.782586227 |
| cox7a2             | CO355138 | 0.52   | 0.078485079 |
| NA                 | CO355808 | -0.401 | 0.405134419 |
| LOC100006421       | CO354823 | 0.711  | 0.017283122 |
| LOC100150256       | CO356355 | 0.676  | 0.259610136 |
| si:ch211-214j24.10 | CO356393 | 0.838  | 0.008356024 |
| wu:fi28f11         | EV562803 | 0.618  | 0.330654704 |
| stau1              | EV563563 | 0.57   | 0.06719746  |
| wu:fa16f04         | EV563570 | 0.353  | 0.24258325  |
| EIF4EBP3L          | EV563880 | -0.415 | 0.204953093 |
| NA                 | EV563893 | -0.255 | 0.301671265 |
| zgc:152925         | EV564044 | 0.333  | 0.408898885 |
| skiv2l2            | EV564175 | 0.405  | 0.112697751 |
| si:dkey-15f17.9    | EV564378 | 0.598  | 0.052916399 |
| mcm5               | CO354454 | 0.111  | 0.796877423 |
| hagh               | EV555506 | -0.101 | 0.872955653 |
| NA                 | EV555579 | 0.419  | 0.170421981 |
| hsp90b1            | EV555612 | 0.323  | 0.380865503 |
| NA                 | EV555699 | -0.263 | 0.457882979 |
| si:dkey-15f17.9    | EV556036 | 0.779  | 0.006938483 |
| NA                 | EV556045 | -0.188 | 0.606499872 |
| NA                 | EV556136 | 0.416  | 0.278275947 |
| EIF3D              | EV556215 | -0.334 | 0.399081433 |
| tuba8l             | EV556216 | -0.504 | 0.179935963 |

|                   |          |        |             |
|-------------------|----------|--------|-------------|
| prim1             | EV556451 | 0.094  | 0.853213473 |
| pno1              | EV556483 | -0.169 | 0.610464677 |
| NA                | EV556845 | 0.958  | 0.009372504 |
| wu:fd12d03        | EV556850 | -0.75  | 0.035979754 |
| ptgds             | EV556934 | -0.897 | 0.349087427 |
| wars2             | EV557106 | 0.407  | 0.062876768 |
| zgc:63863         | EV557121 | 0.308  | 0.298099037 |
| LOC100334363      | EV557473 | -0.399 | 0.517076024 |
| LOC100536996      | EV557501 | -0.336 | 0.38756763  |
| LOC100536577      | EV557690 | -0.081 | 0.888306128 |
| shmt1             | EV559528 | -0.372 | 0.56473897  |
| c1galt1c1         | EV559920 | 0.723  | 0.078159884 |
| igf2bp3           | EV560177 | 0.406  | 0.297508009 |
| mrps18c           | EV560717 | 0.029  | 0.956914587 |
| pvr13l            | EV560950 | 0.46   | 0.121527633 |
| znf259            | EV606517 | 0.362  | 0.240577385 |
| dhdhl             | EV603593 | -0.371 | 0.341839603 |
| pdc10b            | EV854379 | 0.312  | 0.145280863 |
| dut               | EV603901 | 0.185  | 0.673158995 |
| si:ch211-216l23.1 | EV604714 | 0.61   | 0.051307106 |
| wu:fi13g07        | EV605070 | 0.888  | 0.009372196 |
| zgc:65873         | EV606203 | -0.38  | 0.370581964 |
| <b>C</b>          |          |        |             |
| ff1b              | AF198086 | 0.551  | 0.034496457 |
| esr2b             | BC086848 | 0.702  | 0.311749739 |
| psen2             | BC065382 | -0.27  | 0.600922555 |
| ff1b              | AF198086 | 0.366  | 0.257628611 |
| tbp               | BC055549 | -0.179 | 0.764508086 |
| snrpc             | CO349742 | -0.599 | 0.012150525 |
| med7              | CO349753 | -0.773 | 0.002070592 |
| ywhaqa            | CO349757 | -0.192 | 0.593006997 |
| si:dkey-44g23.5   | CO349763 | -0.394 | 0.286478618 |
| rpl14             | CO349836 | 0.4    | 0.314935832 |
| zgc:152652        | CO349853 | -0.411 | 0.259610136 |
| si:ch211-210c8.7  | CO349873 | -0.828 | 0.004657045 |
| glulb             | CO349883 | -0.621 | 0.029098678 |
| wasf3             | CO349919 | -0.601 | 0.080241844 |
| rpl36             | CO349922 | 0.734  | 0.053656796 |
| si:ch73-86n6.2    | CO349942 | -0.295 | 0.258359957 |
| LOC100534666      | CO349954 | -0.692 | 0.005724498 |
| c1orf109          | CO349967 | -0.563 | 0.026237228 |
| zgc:92041         | CO349978 | 3.5    | 0.050332316 |
| dldh              | CO349985 | 0.642  | 0.079684502 |
| NA                | CO349989 | 0.808  | 0.015278087 |

|                |          |        |             |
|----------------|----------|--------|-------------|
| ppp2r2a        | CO349991 | 0.266  | 0.512526763 |
| esr1           | CO350018 | 0.7    | 0.014217355 |
| rpl12          | CO350026 | -0.272 | 0.24258325  |
| hsd17b12b      | CO350063 | 0.234  | 0.487849656 |
| LOC793710      | CO350092 | -0.683 | 0.143119224 |
| dirc2          | CO350118 | -0.456 | 0.563344427 |
| LOC100001845   | CO350158 | -0.405 | 0.093903481 |
| ube2a          | CO350164 | -0.468 | 0.050029533 |
| NA             | CO350177 | 0.497  | 0.032704878 |
| zgc:92242      | CO350182 | 0.135  | 0.805242011 |
| daxx           | CO350213 | -0.314 | 0.469386675 |
| coq9           | CO350263 | 0.203  | 0.424533777 |
| si:dkey-22a1.2 | CO350266 | -0.745 | 0.115790109 |
| terf1          | CO350293 | -0.357 | 0.180082567 |
| NA             | CO350360 | -0.714 | 0.109784916 |
| zgc:77051      | CO350366 | -0.278 | 0.237017578 |
| zgc:171777     | CO350401 | -0.606 | 0.01975508  |
| cry1l          | CO350412 | 0.458  | 0.105884877 |
| ryr1b          | CO350465 | 0.329  | 0.381917534 |
| zgc:113944     | CO350480 | 0.325  | 0.433439712 |
| prdx5          | CO350499 | 0.76   | 0.072752151 |
| ctu2           | CO350557 | -0.57  | 0.029160762 |
| wdr61          | CO350562 | -0.295 | 0.376381991 |
| NA             | CO350565 | -0.532 | 0.119363462 |
| wu:fc06d12     | CO350578 | -0.496 | 0.068505237 |
| NA             | CO350580 | 0.357  | 0.129832441 |
| zgc:136263     | CO350586 | -0.136 | 0.737916681 |
| LOC100332117   | CO350588 | -0.995 | 0.00252187  |
| zgc:110816     | CO350603 | -0.763 | 0.022954762 |
| ebp            | CO350684 | 0.803  | 0.001298584 |
| rpl11          | CO350714 | 0.762  | 0.011850675 |
| zgc:111961     | CO350759 | -0.382 | 0.374305063 |
| NA             | CO352613 | 0.498  | 0.39630103  |
| zgc:153918     | CO352675 | 0.58   | 0.139565954 |
| NA             | CO352702 | 1.495  | 0.062876768 |
| rpl5a          | CO352711 | 0.892  | 0.005946808 |
| zgc:101540     | CO352713 | 0.781  | 0.07969957  |
| LOC795887      | CO352720 | 0.402  | 0.090873765 |
| immp11         | CO352727 | -0.381 | 0.061267672 |
| rhoaa          | CO352732 | 0.753  | 0.073016885 |
| zgc:103496     | CO352754 | -0.364 | 0.284004442 |
| NA             | CO352765 | -0.48  | 0.030528923 |
| zgc:162148     | CO352769 | 0.325  | 0.408898885 |

|              |          |        |             |
|--------------|----------|--------|-------------|
| rassf1       | CO352779 | 0.67   | 0.021110347 |
| akirin1      | CO352783 | -0.317 | 0.174149529 |
| uap1         | CO352786 | 0.44   | 0.514991843 |
| gnmt         | CO352839 | 0.565  | 0.141935414 |
| NA           | CO352859 | 0.513  | 0.043916635 |
| zc3h7b       | CO352868 | 0.5    | 0.043395667 |
| LOC100538252 | CO352874 | 0.623  | 0.011808317 |
| lasp1        | CO352888 | 0.394  | 0.21886466  |
| tomm20b      | CO352892 | 0.639  | 0.010962599 |
| LOC100534896 | CO352898 | -0.044 | 0.935865221 |
| NA           | CO352909 | 0.248  | 0.490265385 |
| zgc:114188   | CO352910 | 0.929  | 0.01062382  |
| zgc:154141   | CO352931 | 0.29   | 0.433881452 |
| NA           | CO352935 | 0.223  | 0.571028426 |
| hspe1        | CO352980 | 0.816  | 0.040870301 |
| star         | CO353010 | -0.77  | 0.012164849 |
| apoeb        | CO353040 | 0.355  | 0.456074813 |
| zgc:73262    | CO353046 | 0.327  | 0.567011196 |
| ubr7         | CO353047 | -0.513 | 0.038025902 |
| zc3h7a       | CO353052 | 0.95   | 0.009526974 |
| atg5         | CO353054 | 0.527  | 0.062876768 |
| NA           | CO353055 | 0.468  | 0.107145558 |
| zgc:113050   | CO353063 | 0.387  | 0.134441599 |
| LOC100151188 | CO353068 | 0.783  | 0.014480533 |
| NA           | CO353085 | 0.524  | 0.146009579 |
| NA           | CO353086 | 0.413  | 0.534187914 |
| cpne1        | CO353097 | 0.368  | 0.256148562 |
| ctsf         | CO353100 | 0.784  | 0.065102253 |
| LOC100150205 | CO353106 | 0.239  | 0.52216369  |
| hnrnpu       | CO353111 | -0.604 | 0.175770287 |
| rps27a       | CO353115 | 0.141  | 0.706507914 |
| cbx3b        | CO353131 | 0.86   | 0.013173232 |
| LOC100536401 | CO353140 | -0.735 | 0.010729935 |
| NA           | CO353191 | 0.974  | 0.032236694 |
| cox6a1       | CO353202 | -0.256 | 0.689026951 |
| NA           | CO353209 | 0.958  | 0.025852688 |
| LOC792676    | CO353210 | 0.412  | 0.135633035 |
| imp4         | CO353225 | -0.535 | 0.017806928 |
| zgc:153665   | CO353228 | -0.559 | 0.276624996 |
| exosc9       | CO353229 | -0.325 | 0.211079091 |
| ube2h        | CO353231 | -0.601 | 0.040870301 |
| cct3         | CO353233 | 0.383  | 0.126134887 |
| rps15a       | CO353243 | 0.99   | 0.003970204 |

|                   |          |        |             |
|-------------------|----------|--------|-------------|
| zgc:101569        | CO353324 | 0.787  | 0.019165497 |
| snx9              | EV854635 | 0.612  | 0.060177164 |
| gorasp2           | EV854636 | -0.195 | 0.593006997 |
| LOC100329811      | CO353301 | 0.759  | 0.036620858 |
| rad1              | CO353288 | -0.595 | 0.082376714 |
| cdc42             | CO353267 | 0.572  | 0.201522067 |
| pfkfb4l           | CO353264 | 0.794  | 0.001652783 |
| LOC100537497      | CO353263 | 0.746  | 0.171784487 |
| rpl12             | CO353429 | -0.894 | 0.006515148 |
| vdac3             | CO353428 | 0.76   | 0.015278087 |
| LOC793688         | CO353414 | 0.586  | 0.033364504 |
| smad7             | CO353392 | 0.689  | 0.114728548 |
| NA                | CO353365 | 0.763  | 0.012558986 |
| vdac3             | CO353428 | 0.898  | 0.00231684  |
| srsf1a            | CO353437 | 0.702  | 0.142328552 |
| grap2b            | CO353451 | 0.881  | 0.01295219  |
| NA                | CO353457 | 0.897  | 0.002713413 |
| NA                | CO353477 | 0.8    | 0.032741945 |
| NA                | CO353497 | 0.489  | 0.177678838 |
| atf4b2            | CO353498 | 0.667  | 0.025884022 |
| hnrmpull          | CO353500 | 0.795  | 0.002038716 |
| pgk1              | CO353531 | -0.054 | 0.940318047 |
| LOC100334568      | CO353537 | 0.969  | 0.020353138 |
| npc2              | CO353554 | -0.601 | 0.015796694 |
| LOC100005118      | CO353563 | 0.563  | 0.065830704 |
| capza1a           | CO353591 | 0.58   | 0.031552376 |
| si:ch211-240119.8 | CO353604 | 2.979  | 0.087786654 |
| zgc:103599        | CO353615 | 1.643  | 0.051847576 |
| NA                | CO353671 | 0.5    | 0.434700775 |
| f8                | CO353685 | -0.407 | 0.024930407 |
| idh1              | CO353699 | 0.272  | 0.340455875 |
| asah1b            | CO353701 | 0.56   | 0.054196806 |
| ckba              | CO353712 | 0.795  | 0.001841541 |
| plaa              | CO353727 | -0.313 | 0.311749739 |
| rps2              | CO353733 | 0.712  | 0.010354536 |
| cstb *            | CO353751 | -0.41  | 0.133139758 |
| crym              | CO353761 | 0.266  | 0.356489489 |
| plekhg4           | CO353772 | 0.756  | 0.037578259 |
| LOC556426         | CO353796 | 0.897  | 0.022728225 |
| slc25a1           | CO353809 | 0.656  | 0.16812042  |
| zgc:65861         | CO353813 | 0.739  | 0.011335814 |
| si:dkey-7814.13   | CO353856 | 0.749  | 0.003924802 |
| zgc:101723        | CO353871 | 0.672  | 0.055400088 |

|                 |          |        |             |
|-----------------|----------|--------|-------------|
| zgc:92683       | CO353879 | 0.417  | 0.173381156 |
| LOC100534835    | CO353892 | -0.402 | 0.118663524 |
| LOC100536788    | CO353912 | 1.789  | 0.088832392 |
| ehhadh          | CO353913 | 0.756  | 0.01590411  |
| zgc:92237       | CO353942 | 0.509  | 0.190939135 |
| NA              | CO353952 | -0.656 | 0.015419084 |
| si:dkey-20i10.6 | CO353960 | 0.805  | 0.008927792 |
| NA              | CO353993 | 0.972  | 0.005333288 |
| zgc:158604      | CO354006 | -0.148 | 0.861836641 |
| myo18l2         | CO354014 | 0.618  | 0.083227543 |
| lasp1           | CO354047 | 0.07   | 0.9093595   |
| zgc:66430       | CO354050 | 0.721  | 0.007123739 |
| NA              | CO354064 | 0.704  | 0.021248571 |
| NA              | CO354080 | 0.396  | 0.178186948 |
| irf9            | CO354086 | 0.495  | 0.072854688 |
| comtb           | CO354089 | 0.401  | 0.207221217 |
| NA              | CO354096 | 0.778  | 0.002173064 |
| spdya           | CO354101 | -0.184 | 0.653873889 |
| krt18           | CO354132 | 1.471  | 0.054893959 |
| nme5            | CO350816 | 0.587  | 0.053657952 |
| sdhaf2          | CO350832 | 0.745  | 0.009201826 |
| ube2a           | CO350860 | 0.662  | 0.014217355 |
| eif1axb         | CO350873 | -0.272 | 0.419793724 |
| maptb           | CO350876 | 0.613  | 0.449466156 |
| pttg1ipb        | CO350884 | -0.467 | 0.117790078 |
| LOC793850       | CO350918 | -0.671 | 0.079684502 |
| zgc:77739       | CO350920 | -0.318 | 0.077056702 |
| ube2g1b         | CO350939 | -0.1   | 0.796877423 |
| rpl3            | CO350952 | 0.461  | 0.157900218 |
| meir5           | CO351003 | -0.764 | 0.019453083 |
| nfs1            | CO351004 | -0.308 | 0.374060377 |
| NA              | CO351012 | -0.911 | 0.001032945 |
| zgc:110697      | CO351015 | -0.651 | 0.006944067 |
| si:dkey-13i19.8 | CO351027 | -0.575 | 0.067106044 |
| LOC100535176    | CO351029 | -0.691 | 0.046523549 |
| NA              | CO351041 | 0.493  | 0.285151635 |
| NA              | CO351046 | 0.585  | 0.069268003 |
| rps4x           | CO351048 | 0.618  | 0.079174379 |
| LOC100535344    | CO351060 | 0.392  | 0.29494053  |
| LOC100005742    | CO351062 | -0.237 | 0.598645603 |
| zgc:56457       | CO351083 | -0.502 | 0.126134887 |
| cirbp           | CO351143 | -0.626 | 0.003583491 |
| cldn11a         | CO351145 | 0.133  | 0.781809201 |

|                 |          |        |             |
|-----------------|----------|--------|-------------|
| NA              | CO351146 | 0.24   | 0.486237837 |
| gng7            | CO351154 | 0.493  | 0.090750701 |
| zgc:136896      | CO351163 | 0.474  | 0.253582529 |
| fam20b          | CO351170 | 0.175  | 0.580492266 |
| NA              | CO351282 | 0.395  | 0.295492377 |
| snrpb2          | CO351298 | -0.593 | 0.012800269 |
| LOC792474       | CO351361 | 0.666  | 0.109557879 |
| zgc:110759      | CO351438 | 0.276  | 0.443147748 |
| pvalb7          | CO351457 | 0.792  | 0.047026403 |
| vat1            | CO351505 | 0.895  | 0.054751727 |
| sfswap          | CO351507 | 0.534  | 0.238944526 |
| paics           | CO351520 | -0.683 | 0.061787988 |
| hif1ab          | CO351522 | 0.397  | 0.293965805 |
| cpe             | CO351537 | 0.431  | 0.17090023  |
| si:ch73-46j18.5 | CO351540 | 0.579  | 0.137934721 |
| aanat1          | CO351588 | -0.425 | 0.413474172 |
| klf11a          | CO351610 | 0.407  | 0.242234878 |
| wu:fb25h12      | CO354172 | -0.708 | 0.063926884 |
| fbp1b           | CO354215 | 0.999  | 0.009372196 |
| LOC100535480    | CO354229 | 0.264  | 0.761746259 |
| col4a6          | CO354233 | 0.902  | 0.038712414 |
| ruvbl1          | CO354286 | -0.438 | 0.041566255 |
| zgc:73328       | CO354333 | -0.634 | 0.034548646 |
| LOC100334807    | CO354352 | -0.776 | 0.005336728 |
| slc25a5         | CO354426 | 0.689  | 0.009085503 |
| rps24           | CO354523 | 0.347  | 0.50333368  |
| galnt14         | CO354570 | 0.587  | 0.283599037 |
| flii            | CO354575 | 0.646  | 0.004612146 |
| zgc:103627      | CO354631 | 0.89   | 0.002551444 |
| epb4113b        | CO354655 | 0.689  | 0.006431206 |
| LOC100536797    | CO354664 | 0.581  | 0.055566583 |
| spc24           | CO354676 | -0.251 | 0.469774754 |
| neu3.3          | CO354692 | 0.591  | 0.050180456 |
| zgc:194319      | CO354694 | -0.642 | 0.062415138 |
| ubtd2           | CO354727 | 0.4    | 0.201822083 |
| pdk3a           | CO354755 | 1.176  | 0.367430413 |
| racgap1         | CO354762 | -0.8   | 0.018202218 |
| gsna            | CO354789 | 0.513  | 0.274442664 |
| ing5b           | CO354799 | -0.391 | 0.169713892 |
| NA              | CO354891 | 0.221  | 0.659675667 |
| LOC100537775    | CO354904 | 0.65   | 0.003436112 |
| NA              | CO354993 | -0.46  | 0.083593238 |
| zgc:101024      | CO355029 | -0.46  | 0.154436056 |



|                 |          |        |             |
|-----------------|----------|--------|-------------|
| LOC100149647    | CO355043 | 0.211  | 0.679859056 |
| serinc1         | CO355046 | 0.871  | 0.072653008 |
| naca            | CO355090 | 0.73   | 0.061244319 |
| nrarpb          | CO355193 | -0.567 | 0.01590411  |
| zgc:110256      | CO355211 | -0.305 | 0.418606507 |
| NA              | CO355213 | 0.265  | 0.441859541 |
| NA              | CO355251 | -0.54  | 0.245529348 |
| zgc:158426      | CO355284 | 0.248  | 0.554565996 |
| NA              | CO355308 | 0.169  | 0.7089641   |
| LOC100536036    | CO355313 | 0.475  | 0.14268893  |
| rpl26           | CO355319 | 0.442  | 0.410265506 |
| anxa3b          | CO355333 | 0.283  | 0.380316557 |
| atp5h           | CO355349 | 0.552  | 0.525071552 |
| mrpl38          | CO355412 | 0.398  | 0.456074813 |
| EIF3G           | CO355422 | 0.316  | 0.389480757 |
| NA              | CO355447 | 0.302  | 0.554565996 |
| NA              | CO355462 | 0.641  | 0.003663882 |
| zgc:136911      | CO355482 | 0.428  | 0.047111028 |
| bdh1            | CO355498 | 0.388  | 0.159031567 |
| pars2           | CO355509 | 0.266  | 0.340455875 |
| si:ch211-10e2.1 | CO355516 | 0.264  | 0.569067903 |
| wu:fc48e01      | CO355569 | 0.216  | 0.454731665 |
| LOC100537763    | CO355597 | 0.321  | 0.238944526 |
| baxb            | CO355630 | 0.42   | 0.123870654 |
| utp11l          | CO355674 | 0.455  | 0.1301441   |
| NA              | CO355701 | 0.226  | 0.464120862 |
| ttl1            | CO355728 | 0.056  | 0.905938713 |
| wu:fb18c02      | CO355762 | 0.523  | 0.078518058 |
| hspb1           | CO355787 | 0.275  | 0.605936402 |
| LOC100537239    | CO355812 | 0.235  | 0.42995482  |
| syp12a          | CO355857 | 0.272  | 0.191958734 |
| NA              | CO355860 | 0.351  | 0.615925436 |
| zgc:110726      | CO355881 | 0.346  | 0.197162118 |
| EIF3C           | CO355896 | 0.295  | 0.384001892 |
| ITLN1           | CO355924 | 0.253  | 0.284072854 |
| tcea3           | CO355931 | 0.08   | 0.828486982 |
| wu:fc55g01      | CO355932 | -0.695 | 0.168823916 |
| tomm40l         | CO355967 | 0.834  | 0.040416449 |
| zgc:158667      | CO355973 | 0.089  | 0.832144425 |
| zgc:92321       | CO355982 | -0.737 | 0.013930939 |
| NA              | CO356019 | 0.335  | 0.26826927  |
| NA              | CO356035 | 0.714  | 0.014149325 |
| LOC564766       | CO356062 | 0.828  | 0.01634781  |

|                   |          |        |             |
|-------------------|----------|--------|-------------|
| sae1              | CO356064 | -0.395 | 0.120057744 |
| dlgap5            | CO356094 | 0.189  | 0.42995482  |
| LOC795882         | CO356097 | 0.242  | 0.640926826 |
| dtnbp1a           | CO356104 | 0.651  | 0.040290326 |
| mpeg1             | CO356135 | 0.278  | 0.453607871 |
| sdc2              | CO356169 | 0.709  | 0.060929164 |
| dedd1             | CO356179 | 0.695  | 0.026709334 |
| mtpn              | CO355478 | 0.463  | 0.042552226 |
| tmem127           | CO356251 | 0.844  | 0.039581293 |
| si:ch211-215c18.4 | CO356274 | 0.652  | 0.162549569 |
| myl6              | CO356285 | 0.311  | 0.670395526 |
| uqcrc2a           | CO356286 | 0.738  | 0.01389468  |
| NA                | CO356298 | 0.913  | 0.001665267 |
| tbp1l             | CO356368 | -0.285 | 0.203212089 |
| sgk1              | CO356437 | 0.658  | 0.082671438 |
| fam86a            | EV854686 | -0.668 | 0.019380951 |
| LOC569113         | EV854690 | 0.455  | 0.218814137 |
| NA                | EV854692 | -0.536 | 0.062164281 |
| cdbl              | EV854727 | 0.738  | 0.048018561 |
| dhrs11b           | EV562731 | 0.941  | 0.032317696 |
| rpp40l            | EV562735 | -0.291 | 0.241626423 |
| fam107b           | EV562740 | 0.762  | 0.01590411  |
| lcn15             | EV562749 | 0.427  | 0.42808072  |
| zgc:103534        | EV562844 | -0.771 | 0.007680192 |
| tp73              | EV562892 | 0.517  | 0.284273166 |
| chst1             | EV562919 | 0.374  | 0.271516734 |
| NA                | EV562942 | 0.489  | 0.354402289 |
| NA                | EV562960 | 0.147  | 0.796120496 |
| lemd3             | EV563028 | -0.213 | 0.443342043 |
| ogdh              | EV563055 | 0.705  | 0.080712689 |
| zgc:154125        | EV563087 | 0.309  | 0.393454362 |
| manba             | EV563168 | -0.544 | 0.216698252 |
| EIF3S10           | EV563259 | 0.306  | 0.281244578 |
| UBE2V2            | EV563370 | 0.697  | 0.011430881 |
| P4HA2             | EV563383 | 0.644  | 0.081774974 |
| COT1L1            | EV563396 | 0.238  | 0.558024461 |
| tmem170a          | EV563404 | 0.956  | 0.008390226 |
| MPHOSPH8          | EV563477 | 0.948  | 0.011430881 |
| NA                | EV563672 | 0.621  | 0.219202556 |
| LOC100535808      | EV563710 | 0.921  | 0.21217489  |
| NA                | EV563810 | 0.832  | 0.022723573 |
| PAPOLB            | EV563819 | 0.301  | 0.498950514 |
| CEP70             | EV563849 | -0.492 | 0.105992863 |

|                   |          |        |             |
|-------------------|----------|--------|-------------|
| LOC100334245      | EV563869 | 0.837  | 0.107009267 |
| NA                | EV563929 | 0.567  | 0.041049921 |
| LOC100536655      | EV563943 | 0.478  | 0.033223347 |
| NA                | EV563947 | 0.692  | 0.019165497 |
| serpina10a        | EV563949 | 0.151  | 0.74715673  |
| zgc:56066         | EV563951 | -0.467 | 0.051291085 |
| ung               | EV564005 | -0.383 | 0.226775926 |
| wu:fb81f11        | EV564034 | 0.363  | 0.202507793 |
| exosc2            | EV564052 | -0.492 | 0.139508478 |
| krcp              | EV564068 | -0.522 | 0.074637926 |
| arhgdig           | EV564089 | 0.913  | 0.009372196 |
| NA                | EV564207 | 0.664  | 0.016019992 |
| cyth1             | EV564227 | 1.12   | 0.300329932 |
| rasgef1bb         | EV564284 | 0.688  | 0.042041697 |
| zgc:103585        | EV564304 | 0.3    | 0.394655804 |
| NA                | EV564341 | 0.312  | 0.462413668 |
| LOC567610         | EV564345 | 0.554  | 0.14268893  |
| LOC561662         | EV564439 | 0.917  | 0.002067018 |
| si:ch73-289a15.2  | EV564462 | -0.517 | 0.047107888 |
| ncapd2            | EV564485 | 0.566  | 0.008248835 |
| zgc:165631        | EV564487 | 0.723  | 0.067493216 |
| blvrb             | EV564504 | -0.376 | 0.311749739 |
| akirin1           | EV564511 | 0.339  | 0.218192489 |
| rbm24b            | EV564535 | 0.688  | 0.018997573 |
| LOC100331748      | EV564551 | 0.66   | 0.093041675 |
| phactr4a          | EV564609 | 0.302  | 0.214506524 |
| LOC799918         | EV564657 | 0.675  | 0.0462463   |
| ppp1r1c           | EV564659 | 0.32   | 0.504807838 |
| si:ch211-197n10.2 | EV564675 | -0.267 | 0.312384355 |
| mcm4              | EV564706 | -0.542 | 0.125443107 |
| selt1b            | EV564711 | 0.238  | 0.38070407  |
| ccng2             | EV564722 | 0.617  | 0.405134419 |
| zgc:77041         | EV564761 | 0.897  | 0.00365127  |
| LOC100535442      | EV564791 | 0.342  | 0.366035254 |
| hif1al            | EV564796 | 0.313  | 0.38504147  |
| NA                | EV564805 | 0.811  | 0.041713307 |
| NA                | EV564843 | 0.683  | 0.041990515 |
| zgc:86764         | EV564889 | -0.198 | 0.354402289 |
| LOC100536419      | EV564893 | -0.513 | 0.116184709 |
| si:ch211-203b8.3  | EV564899 | -0.533 | 0.029727924 |
| LOC100535373      | EV564927 | 0.913  | 0.000775972 |
| LOC100330256      | EV564965 | -0.82  | 0.028934353 |
| polr2eb           | EV564969 | 1.04   | 0.059667405 |

|                  |          |        |             |
|------------------|----------|--------|-------------|
| NA               | EV565055 | 0.595  | 0.025175892 |
| zgc:100811       | EV565057 | -0.344 | 0.191218397 |
| zwilch           | EV565102 | -0.209 | 0.559903621 |
| suv39h1b         | EV854404 | -0.498 | 0.038827035 |
| EIF3JA           | EV854425 | -0.679 | 0.007929152 |
| Gale             | CO350342 | -0.301 | 0.299507562 |
| si:ch211-266i6.3 | CO350508 | -0.799 | 0.070965171 |
| c1d              | CO351237 | -0.471 | 0.138027148 |
| LOC100002043     | CO351529 | 1.679  | 0.06733238  |
| LOC100535183     | CO351755 | 0.432  | 0.327072521 |
| zgc:55781        | EV854454 | -0.239 | 0.468285664 |
| NA               | EV854507 | 0.259  | 0.534187914 |
| akt2l            | EV854539 | 0.502  | 0.413459417 |
| LOC100151050     | EV854551 | 0.681  | 0.010729935 |
| nrxn1b           | CO353129 | 0.899  | 0.007100024 |
| zgc:111976       | EV854602 | -0.507 | 0.110735137 |
| zgc:112265       | CO353250 | 0.671  | 0.084063977 |
| si:ch211-93f2.1  | CO353280 | 0.676  | 0.042046462 |
| si:ch211-1n9.7   | CO353321 | 0.694  | 0.055156091 |
| si:ch211-272f3.4 | CO353370 | 1.174  | 0.054610636 |
| NA               | CO353394 | 0.849  | 0.070806581 |
| aldh1a2          | CO353562 | 0.546  | 0.371200117 |
| LOC567594        | EV555201 | -0.716 | 0.014667557 |
| mrpl14           | EV555213 | -0.608 | 0.036616921 |
| ublcp1           | EV555235 | -0.576 | 0.055283071 |
| sub1             | EV555259 | -0.439 | 0.334432627 |
| efhd2            | EV555286 | 0.348  | 0.489924405 |
| zgc:136826       | EV555298 | 0.975  | 0.01354099  |
| capza1b          | EV555311 | 0.447  | 0.040138096 |
| ctnmb2           | EV555350 | 0.676  | 0.027404016 |
| lyg1l            | EV555402 | 0.408  | 0.386385989 |
| NA               | EV555404 | -0.703 | 0.005683867 |
| rpl36a           | EV555494 | 0.473  | 0.181146659 |
| aldh3d1          | EV555603 | -0.644 | 0.029032909 |
| rbx1             | EV555628 | -0.481 | 0.077749154 |
| pgrmc1           | EV555678 | 0.448  | 0.205837521 |
| si:dkey-51e6.1   | EV555700 | 0.896  | 0.043355572 |
| LOC100000332     | EV555701 | -0.915 | 0.016750756 |
| NA               | EV555716 | 0.471  | 0.157460834 |
| ppp1r7           | EV555726 | -0.399 | 0.200856613 |
| NA               | EV555727 | 0.504  | 0.027904708 |
| NA               | EV555808 | 0.221  | 0.647429467 |
| zgc:92744        | EV555822 | 0.65   | 0.032305225 |

|                   |          |        |             |
|-------------------|----------|--------|-------------|
| pgam1a            | EV555825 | 0.68   | 0.024930407 |
| wu:fj82b07        | EV555841 | -0.888 | 0.443342043 |
| rps18             | EV555858 | 0.654  | 0.074026896 |
| zgc:158228        | EV555883 | -0.175 | 0.640926826 |
| pdhb              | EV555923 | 0.856  | 0.002984631 |
| cyp46a2           | EV555924 | 0.242  | 0.482043789 |
| iqcc              | EV555926 | -0.5   | 0.038515023 |
| si:ch211-210c8.7  | EV555942 | -0.717 | 0.003623661 |
| ints3             | EV555963 | -0.201 | 0.675033438 |
| tsr2              | EV555967 | -0.45  | 0.078374167 |
| qars              | EV555995 | -0.249 | 0.263433076 |
| NA                | EV555996 | 0.531  | 0.043604737 |
| NA                | EV556107 | 0.28   | 0.489924405 |
| zgc:152851        | EV556108 | -0.628 | 0.022439931 |
| ints12            | EV556117 | -0.587 | 0.381043468 |
| tmem93            | EV556134 | -0.31  | 0.258076368 |
| phgdh             | EV556195 | -0.375 | 0.097168172 |
| nsun5             | EV556197 | -0.279 | 0.235337454 |
| wu:fj05h12        | EV556305 | 0.359  | 0.6833372   |
| cnpy2             | EV556320 | -0.457 | 0.205668232 |
| NA                | EV556413 | 0.988  | 0.023107963 |
| ptgr1             | EV556456 | -0.736 | 0.038025902 |
| NA                | EV556473 | 0.237  | 0.56523803  |
| si:ch211-236l14.3 | EV556489 | 0.487  | 0.288645228 |
| ccdc58            | EV556586 | -0.53  | 0.048018561 |
| NA                | EV556599 | -0.161 | 0.696095052 |
| med4              | EV556635 | -0.512 | 0.649238376 |
| treh              | EV556637 | -0.895 | 0.013930939 |
| NA                | EV556726 | -0.533 | 0.048805972 |
| dhrs13            | EV556745 | -0.644 | 0.035176804 |
| zgc:101016        | EV556770 | -0.597 | 0.026653189 |
| LOC100333807      | EV556837 | -0.295 | 0.434469476 |
| LOC100534896      | EV556859 | -0.21  | 0.527898678 |
| si:dkeyp-2e4.5    | EV556979 | -0.502 | 0.026051183 |
| stxbp3            | EV557060 | -0.27  | 0.903766864 |
| NA                | EV557065 | -0.605 | 0.087070927 |
| zgc:158257        | EV557089 | -0.283 | 0.585362587 |
| brip1             | EV557097 | 0.801  | 0.279808892 |
| NA                | EV557104 | 0.646  | 0.056621766 |
| NA                | EV557151 | 0.292  | 0.342088596 |
| NA                | EV557179 | 0.662  | 0.005017251 |
| slc39a7           | EV557180 | 0.711  | 0.001298286 |
| LOC100535417      | EV557277 | 0.769  | 0.006778178 |

|                  |          |        |             |
|------------------|----------|--------|-------------|
| NA               | EV557291 | -0.421 | 0.329506859 |
| sumo3a           | EV557294 | -0.571 | 0.089568876 |
| sc:d808          | EV557326 | -0.51  | 0.041190103 |
| im:7137597       | EV557365 | -0.56  | 0.055488424 |
| LOC100537670     | EV557415 | 0.98   | 0.107980329 |
| ldlrp1a          | EV557427 | -0.154 | 0.618886821 |
| rbbp6            | EV557446 | 0.477  | 0.034283378 |
| zgc:161973       | EV557457 | 1.191  | 0.067753282 |
| tuba2            | EV557535 | 0.521  | 0.164562489 |
| LOC100334473     | EV557552 | 1.074  | 0.087857828 |
| LOC798352        | EV557593 | -0.499 | 0.050332316 |
| si:busm1-118j2.5 | EV557639 | 0.631  | 0.823858863 |
| LOC100538042     | EV557647 | 0.514  | 0.069449796 |
| ing2             | EV557692 | -0.434 | 0.065614201 |
| zgc:154067       | EV557840 | -0.614 | 0.03857221  |
| zgc:55395        | EV557888 | -0.42  | 0.216651374 |
| zgc:92417        | EV557916 | -0.409 | 0.201522067 |
| NA               | EV557992 | 0.385  | 0.474761444 |
| zswim7           | EV558019 | -0.31  | 0.596284198 |
| pdk2             | EV558064 | 0.806  | 0.02878608  |
| NA               | EV558117 | -0.263 | 0.402075377 |
| mrps6            | EV558207 | -0.263 | 0.38930379  |
| gbgt114          | EV558285 | -0.258 | 0.347441957 |
| cxxc1            | EV558288 | -0.21  | 0.376267162 |
| zgc:123178       | EV558359 | 0.467  | 0.049525614 |
| adipor2          | EV558384 | 0.615  | 0.024169714 |
| tbpl2            | EV558452 | -0.36  | 0.195925932 |
| phf23a           | EV558485 | -0.336 | 0.374305063 |
| thoc3            | EV558494 | -0.293 | 0.380937452 |
| cfl2l            | EV558517 | -0.719 | 0.012687292 |
| NA               | EV558530 | 0.521  | 0.627145466 |
| si:dkey-273o13.2 | EV558534 | -0.38  | 0.181560797 |
| NA               | EV558642 | -0.927 | 0.11698225  |
| rpl9             | EV558749 | 0.249  | 0.38070407  |
| zgc:92184        | EV558751 | -0.594 | 0.044407342 |
| zgc:153377       | EV558849 | -0.645 | 0.092037082 |
| trdmt1           | EV558944 | -0.522 | 0.020353138 |
| LOC563794        | EV559064 | 0.545  | 0.043435127 |
| alg14            | EV559103 | -0.856 | 0.020459948 |
| ppapdc1b         | EV559127 | -0.479 | 0.080374555 |
| brd2a            | EV559139 | -0.838 | 0.049055837 |
| tbcc1            | EV559154 | -0.401 | 0.159031567 |
| acadm            | EV559206 | 0.197  | 0.548493797 |

|                   |          |        |             |
|-------------------|----------|--------|-------------|
| LOC100536831      | EV559254 | -0.5   | 0.284781809 |
| si:ch211-191i18.1 | EV559286 | -0.499 | 0.220849766 |
| psmc3ip           | EV559315 | -0.375 | 0.168303814 |
| wwp2              | EV559318 | -0.795 | 0.013930939 |
| actn3b            | EV559325 | 1.18   | 0.355624237 |
| wu:fe05a04        | EV559443 | -0.27  | 0.399482563 |
| rsl24d1           | EV559467 | 0.537  | 0.081356144 |
| seh1l             | EV559482 | -0.553 | 0.049139053 |
| pgp               | EV559495 | -0.469 | 0.086260221 |
| ttc32             | EV559596 | -0.953 | 0.002750926 |
| LOC100537729      | EV559599 | -0.248 | 0.753291962 |
| si:dkey-14d8.1    | EV559630 | -0.515 | 0.03673339  |
| prps1a            | EV559655 | -0.372 | 0.218192489 |
| tfdp1b            | EV559695 | -0.339 | 0.218598649 |
| cdkn3             | EV559715 | -0.51  | 0.020496494 |
| NA                | EV559766 | -0.753 | 0.5284526   |
| LOC100535847      | EV559795 | -0.243 | 0.860556378 |
| bxdc2             | EV559829 | -0.376 | 0.099576219 |
| LOC407698         | EV559885 | -0.644 | 0.102988261 |
| rac1              | EV560028 | -0.893 | 0.080340384 |
| usp10             | EV560041 | -0.585 | 0.161418971 |
| pppde1            | EV560109 | -0.612 | 0.123113079 |
| si:ch211-59d15.9  | EV560155 | -0.785 | 0.006944067 |
| GCH1 *            | EV560170 | 0.631  | 0.262866281 |
| si:ch211-51e12.7  | EV560202 | -0.349 | 0.16967398  |
| zgc:73311         | EV560206 | 0.895  | 0.006778178 |
| rac1              | EV560270 | -0.573 | 0.06554355  |
| chmp4c            | EV560271 | -0.254 | 0.449466156 |
| nop16             | EV560273 | -0.487 | 0.469386675 |
| zgc:63938         | EV560342 | 1.17   | 0.071904168 |
| wu:fc76b11        | EV560351 | -0.631 | 0.021893411 |
| zgc:92177         | EV560405 | -0.66  | 0.023122345 |
| gfer              | EV560439 | -0.97  | 0.001556381 |
| tdp2b             | EV560482 | -0.74  | 0.01371571  |
| golt1b            | EV560565 | -0.377 | 0.105976602 |
| serf2             | EV560626 | 0.448  | 0.277135938 |
| tph1a             | EV560659 | -0.736 | 0.394823096 |
| trip13            | EV560777 | -0.157 | 0.843071654 |
| zgc:153393        | EV560834 | -0.657 | 0.015733512 |
| si:dkeyp-12a9.5   | EV560888 | -0.368 | 0.147032083 |
| LOC100147955      | EV560914 | -0.384 | 0.151351655 |
| zgc:73187         | EV560958 | -0.344 | 0.189554398 |
| LOC100535315      | EV560990 | -0.713 | 0.11215597  |

|                  |          |        |             |
|------------------|----------|--------|-------------|
| exosc8           | EV561004 | -0.083 | 0.863692999 |
| pcid2            | EV561076 | -0.38  | 0.256810396 |
| LOC100538140     | EV561078 | -0.939 | 0.004001054 |
| eed              | EV561141 | -0.16  | 0.736924947 |
| ggps1            | EV561212 | -0.475 | 0.234436507 |
| tmprss4b         | EV561274 | -0.463 | 0.087857828 |
| rab35            | EV561361 | -0.464 | 0.058157763 |
| wdr45l           | EV561404 | -0.854 | 0.006636586 |
| spint1b          | EV561444 | -0.666 | 0.048170326 |
| tram1            | EV561479 | -0.819 | 0.079383504 |
| zgc:92670        | EV561517 | -0.331 | 0.185127734 |
| fbln5            | EV561587 | 0.011  | 0.994422311 |
| mapre1l          | EV603135 | -0.194 | 0.504525448 |
| zgc:193538       | EV603174 | -0.325 | 0.271102073 |
| zgc:158667       | EV603231 | 0.821  | 0.001984727 |
| srsf2            | EV603246 | -0.403 | 0.144580523 |
| NA               | EV603271 | 0.481  | 0.528441764 |
| sept4a           | EV603300 | -0.206 | 0.476215988 |
| timm9            | EV603305 | -0.307 | 0.301671265 |
| zcchc8           | EV603439 | -0.107 | 0.846735614 |
| zgc:153393       | EV603577 | -0.665 | 0.026175984 |
| LOC100535992     | EV603655 | 0.66   | 0.351929173 |
| LOC100536377     | EV603679 | -0.203 | 0.574501964 |
| synj2bp          | EV603740 | -0.336 | 0.168340678 |
| hnrmpa1          | EV603815 | -0.562 | 0.139508478 |
| LOC100334678     | EV603833 | -0.3   | 0.377801186 |
| NA               | EV603867 | 0.364  | 0.232138741 |
| zgc:101565       | EV603888 | -0.678 | 0.695177038 |
| zgc:56688        | EV603894 | -0.705 | 0.034471591 |
| ncbp2            | EV603899 | -0.671 | 0.022271054 |
| si:zfos-47c12.1  | EV854378 | -0.765 | 0.001439871 |
| NA               | EV604032 | -0.728 | 0.009305082 |
| mcm10            | EV604062 | -0.267 | 0.50244815  |
| LOC564156        | EV604105 | -0.855 | 0.025592932 |
| LOC100537724     | EV604131 | -0.44  | 0.288252797 |
| pcna             | EV604138 | -0.621 | 0.010609446 |
| b3gat3           | EV604195 | 0.85   | 0.010494963 |
| vcp              | EV604208 | -0.234 | 0.37312368  |
| LOC561086        | EV604312 | -0.61  | 0.005683867 |
| si:dkey-265a7.2  | EV604486 | -0.36  | 0.100942448 |
| pre1a            | EV606523 | -0.302 | 0.312457351 |
| si:dkey-177p2.14 | EV604569 | -0.633 | 0.029098678 |
| capza1b          | EV604599 | 0.882  | 0.002173064 |



|                   |          |        |             |
|-------------------|----------|--------|-------------|
| sec62             | EV604676 | 0.907  | 0.012067356 |
| insb              | EV604706 | -0.817 | 0.015018819 |
| selm              | EV604727 | -0.676 | 0.11844339  |
| abhd10b           | EV604771 | -0.427 | 0.048987248 |
| zgc:154064        | EV604811 | -0.465 | 0.157900218 |
| mbnl2             | EV604872 | 0.787  | 0.021747946 |
| LOC564674         | EV604874 | -0.901 | 0.016582791 |
| st8sia4           | EV604964 | 0.66   | 0.250323237 |
| buc               | EV605077 | -0.677 | 0.005969547 |
| NA                | EV605089 | 0.766  | 0.282389902 |
| irf5              | EV605104 | -0.303 | 0.33101467  |
| dnajc2            | EV605155 | -0.204 | 0.912256978 |
| arid3b            | EV605168 | -0.535 | 0.040870301 |
| LOC566020         | EV605263 | -0.777 | 0.008602962 |
| txlnba            | EV605277 | -0.722 | 0.016750756 |
| cratb             | EV605332 | -0.703 | 0.003314074 |
| hmgb3b            | EV605347 | -0.134 | 0.759190419 |
| si:ch211-234f14.1 | EV605455 | 0.416  | 0.585362587 |
| si:dkey-42i9.5    | EV605594 | -0.263 | 0.48840198  |
| si:dkeyp-26a9.2   | EV605678 | -0.506 | 0.081731335 |
| nudcd1            | EV605685 | -0.394 | 0.057385821 |
| NA                | EV605812 | 0.541  | 0.097716189 |
| LOC100537390      | EV605850 | -0.334 | 0.147748516 |
| LOC555985         | EV605902 | -0.561 | 0.025852688 |
| si:ch211-14a17.6  | EV605918 | -0.559 | 0.043395667 |
| zpcx              | EV605919 | -0.599 | 0.194500263 |
| zgc:85657         | EV605984 | -0.42  | 0.061931671 |
| fen1              | EV606002 | -0.772 | 0.008424686 |
| mat2a             | EV606012 | -0.282 | 0.387679936 |
| LOC797655         | EV606192 | -0.182 | 0.793434864 |
| mapk3             | EV606200 | -0.452 | 0.16967398  |
| hars2             | EV606228 | -0.507 | 0.043395667 |
| <b>D</b>          |          |        |             |
| LOC100536474      | CO351102 | 1.794  | 0.002340852 |
| ba1               | CO356089 | 2.935  | 0.004495966 |
| LOC100334539      | CO356090 | 2.913  | 0.003772252 |
| mif4gdb           | CO356133 | 1.429  | 0.013786135 |
| ndufb4            | CO355513 | 1.117  | 0.000309079 |
| LOC569452         | EV563726 | 1.331  | 0.002471825 |
| msnb              | EV563857 | 1.1    | 0.008242352 |
| <b>E</b>          |          |        |             |
| NA                | CO349743 | 1.537  | 0.004493564 |
| NA                | CO349772 | 2.896  | 2.2782E-06  |
| rae1              | CO349827 | 2.004  | 0.000306244 |

|                   |          |       |             |
|-------------------|----------|-------|-------------|
| zgc:92869         | CO349835 | 1.555 | 0.003747174 |
| NA                | CO349895 | 2.171 | 0.000386934 |
| ptmab             | CO350017 | 2.041 | 0.006938483 |
| si:dkey-127k13.2  | CO350097 | -1.66 | 1.30847E-05 |
| zgc:92707         | CO350202 | 2.41  | 0.000192755 |
| cpa5              | CO350307 | 4.596 | 0.01590411  |
| uqerc2b           | CO350500 | 1.475 | 0.004408475 |
| fabp10a           | CO350530 | 1.809 | 0.042094464 |
| zgc:172056        | CO350607 | 2.543 | 0.00010884  |
| si:ch211-215a10.4 | CO350782 | 1.719 | 0.001007098 |
| tpi1b             | CO352643 | 1.613 | 0.008927792 |
| zgc:194314        | CO352680 | 2.585 | 0.002755879 |
| NA                | CO352697 | 2.031 | 0.000084359 |
| s100a10b          | CO352759 | 1.547 | 0.027404016 |
| zgc:153978        | CO352924 | 4.282 | 1.14634E-08 |
| si:ch211-261c8.5  | CO352943 | 3.947 | 4.72801E-09 |
| gabpa             | CO352974 | 1.177 | 0.002038716 |
| LOC100534968      | CO352975 | 2.423 | 3.45548E-06 |
| rpl24             | CO353339 | 1.238 | 0.000272561 |
| letm2             | CO353330 | 1.484 | 0.000876794 |
| NA                | CO353259 | 1.814 | 8.53834E-05 |
| NA                | CO353254 | 1.821 | 0.001138593 |
| hmgb1a            | CO353395 | 1.291 | 0.028112837 |
| saga              | CO353372 | 1.105 | 0.014244705 |
| zgc:77177         | CO353416 | 1.154 | 3.78036E-05 |
| wu:fb21f05        | CO353417 | 1.804 | 0.002038716 |
| vdac3             | CO353434 | 1.3   | 9.53571E-05 |
| NA                | CO353502 | 1.227 | 0.016561963 |
| NA                | CO353516 | 1.626 | 0.002713413 |
| LOC100151188      | CO353696 | 2.43  | 9.53114E-07 |
| NA                | CO353767 | 1.062 | 0.000304084 |
| podxl             | CO353822 | 1.292 | 0.001287144 |
| dennd1a           | CO353849 | 1.017 | 0.025702663 |
| LOC797338         | CO353858 | 1.115 | 0.003792537 |
| apoc1l            | CO353881 | 4.571 | 0.004867925 |
| LOC555988         | CO353882 | 2.581 | 0.010068828 |
| slc25a3b          | CO353939 | 2.21  | 0.000352519 |
| ddhd1             | CO353964 | 1.57  | 0.002551444 |
| NA                | CO354000 | 1.182 | 0.000832309 |
| zgc:123017        | CO354004 | 1.111 | 0.000265805 |
| zgc:193690        | CO354016 | 1.068 | 0.001783354 |
| ahcy              | CO354113 | 1.357 | 0.002038716 |
| zgc:63675         | CO354121 | 3.108 | 0.000352519 |

|              |          |        |             |
|--------------|----------|--------|-------------|
| zgc:92590    | CO354123 | 5.837  | 0.001138593 |
| NA           | CO350882 | 1.134  | 0.001362921 |
| zgc:101569   | CO350886 | -1.265 | 0.035099894 |
| LOC100535597 | CO351075 | -1.191 | 0.000650435 |
| ppial        | CO351094 | -1.149 | 0.000265805 |
| zgc:195154   | CO351481 | 1.502  | 0.012595499 |
| LOC799290    | CO351500 | 1.307  | 0.002818131 |
| itm2bb       | CO354174 | 1.201  | 0.003427019 |
| NA           | CO354218 | 1.643  | 0.004685056 |
| b2m          | CO354275 | 1.393  | 0.015595985 |
| LOC795545    | CO354306 | 1.621  | 0.001739962 |
| gpx1a        | CO354339 | 1.735  | 0.01269898  |
| zgc:162356   | CO354399 | 2.701  | 0.000015387 |
| nme4         | CO354451 | 1.346  | 0.010352776 |
| acta1b       | CO354459 | 2.245  | 3.35247E-07 |
| eif1b        | CO354527 | 1.174  | 0.000750878 |
| strn3        | CO354619 | 1.336  | 2.2782E-06  |
| aldh9a1a     | CO354630 | 1.551  | 0.000017995 |
| tp53inp1     | CO354681 | 2.08   | 0.004979368 |
| calm2b       | CO354684 | 1.383  | 0.032403095 |
| NA           | CO354737 | 1.143  | 0.007844704 |
| zgc:77808    | CO354941 | 3.579  | 0.006423992 |
| NA           | CO354953 | 2.602  | 5.96689E-06 |
| zgc:112160   | CO354973 | 4.338  | 0.018607469 |
| zgc:92631    | CO354981 | 2.483  | 0.000002178 |
| LOC100005117 | CO355025 | -1.947 | 0.000114982 |
| NA           | CO355033 | 2.715  | 0.020497509 |
| igfbp1a      | CO355363 | 2.405  | 0.004749899 |
| LOC100535672 | CO355480 | 4.524  | 0.009322112 |
| mylz2        | CO355517 | 3.726  | 9.53114E-07 |
| nubpl        | CO355564 | 1.478  | 0.002038716 |
| aldob        | CO355676 | 3.371  | 0.002838441 |
| NA           | CO355677 | 1.002  | 0.003500184 |
| snrpa        | CO355749 | 1.026  | 0.001138593 |
| LOC563795    | CO355852 | 1.738  | 0.010433913 |
| acta2        | CO356007 | 2.258  | 0.00027437  |
| tmed1b       | CO356013 | 1.424  | 0.001812106 |
| try          | CO356113 | 3.254  | 0.009419398 |
| rbp2a        | CO356149 | 4.625  | 6.41316E-05 |
| LOC100537045 | CO355205 | 1.694  | 0.006659513 |
| lyz          | CO355823 | 2.921  | 0.0193934   |
| LOC100330218 | CO356232 | 1.011  | 0.00174003  |
| zgc:63660    | CO356457 | 1.285  | 0.009134166 |

|                 |          |        |             |
|-----------------|----------|--------|-------------|
| si:dkey-4e7.3   | EV562845 | 1.331  | 0.001531141 |
| LOC100537212    | EV562895 | 4.13   | 4.72801E-09 |
| NA              | EV562983 | 1.55   | 5.11199E-05 |
| ctdSpl2a        | EV563012 | 2.517  | 0.030110745 |
| myoz2a          | EV563250 | 1.299  | 0.000200418 |
| zgc:110340      | EV563455 | 1.055  | 0.00225611  |
| calr12          | EV563475 | 2.06   | 4.44629E-08 |
| LOC100535291    | EV563649 | 3.004  | 0.034999861 |
| LOC795071       | EV563654 | 5.165  | 0.005914836 |
| asf1bb          | EV563738 | 1.324  | 0.006327037 |
| si:dkeyp-73d8.6 | EV563926 | 3.767  | 0.006170038 |
| si:ch211-89f7.4 | EV564046 | 1.236  | 0.011932205 |
| LOC100302390    | EV564118 | 2.226  | 9.27155E-06 |
| zgc:103594      | EV564292 | 4.14   | 1.6184E-06  |
| ccng2           | EV564343 | 1.052  | 0.001194414 |
| zdhhc13         | EV564347 | 1.643  | 0.000265805 |
| LOC100330312    | EV564479 | 1.608  | 0.002984631 |
| mcm3ap          | EV564494 | 3.057  | 0.00365127  |
| gpx4a           | EV564524 | 2.852  | 0.01389468  |
| zgc:64161       | EV564961 | 2.039  | 0.000197531 |
| LOC100536840    | CO351688 | -1.504 | 0.021665091 |
| LOC100536776    | CO352746 | 1.627  | 0.003747174 |
| NA              | CO353251 | 1.176  | 0.000223198 |
| NA              | CO353256 | 1.688  | 0.014095526 |
| gpd1b           | CO353353 | 1.258  | 0.000927107 |
| zgc:136458      | EV555253 | 1.066  | 0.000084359 |
| zgc:56676       | EV555614 | -1.041 | 0.001984727 |
| NA              | EV555949 | 1.384  | 0.026136818 |
| stmn1a          | EV556035 | -1.155 | 0.030087989 |
| NA              | EV556059 | 1.158  | 0.010470143 |
| NA              | EV556084 | 1.145  | 0.000760086 |
| tefa            | EV556419 | 1.035  | 0.002490988 |
| zgc:110788      | EV557790 | -1.501 | 0.000277747 |
| NA              | EV558075 | 1.567  | 0.007194453 |
| NA              | EV558188 | 1.409  | 0.000197531 |
| bcam            | EV558251 | 1.18   | 0.001708761 |
| LOC100333174    | EV558564 | 1.495  | 0.003406646 |
| NA              | EV558789 | -1.158 | 0.010609446 |
| tmem183a        | EV558899 | -1.005 | 0.011768372 |
| elovl6l         | EV559028 | -1.624 | 0.000015387 |
| aldh6a1         | EV559178 | 1.33   | 0.012078516 |
| zgc:161973      | EV559301 | 1.301  | 0.015278087 |
| NA              | EV560167 | 1.346  | 0.023727957 |

|                   |          |        |             |
|-------------------|----------|--------|-------------|
| NA                | EV560403 | -1.48  | 0.000402188 |
| LOC798927         | EV560997 | -1.195 | 0.009085503 |
| prpsap2           | EV561045 | -1.493 | 0.000272561 |
| adh8b             | EV603276 | 1.266  | 0.029727924 |
| cpb1              | EV603485 | 1.201  | 0.002946144 |
| NA                | EV854377 | 1.553  | 0.001984727 |
| srsf5a            | EV854387 | 1.279  | 6.22414E-05 |
| zgc:165555        | EV604162 | -1.776 | 5.69379E-05 |
| si:ch211-195i21.1 | EV604307 | -1.295 | 0.002819764 |
| LOC100151188      | EV604577 | 2.573  | 8.92196E-07 |
| ptmaa             | EV604828 | 2.229  | 0.000146704 |
| grik1a            | EV604936 | -1.026 | 0.006203748 |
| zgc:153126        | EV605075 | -1.015 | 0.047150616 |
| <b>F</b>          |          |        |             |
| zp2               | AF331968 | -1.037 | 0.11215597  |
| zp2               | AF331968 | -1.172 | 0.075519832 |
| bactin2           | CO353568 | -0.363 | 0.534187914 |
| si:rp71-56i13.6   | CO349714 | -0.447 | 0.144536142 |
| guf1              | CO349715 | -0.058 | 0.89729377  |
| zgc:100861        | CO349728 | -0.989 | 0.000352519 |
| cisd2             | CO349730 | -0.438 | 0.069268003 |
| slc16a3           | CO349732 | -0.415 | 0.244643826 |
| abhd4             | CO349741 | -0.42  | 0.220849766 |
| si:dkey-44g23.5   | CO349747 | 0.913  | 0.002546619 |
| myef2             | CO349749 | 0.223  | 0.636090304 |
| LOC100535602      | CO349751 | -0.824 | 0.034283378 |
| fth1a             | CO349769 | -0.31  | 0.229087966 |
| NA                | CO349774 | 0.452  | 0.552715435 |
| zgc:109888        | CO349796 | 0.838  | 0.043395667 |
| tspan13a          | CO349798 | -0.501 | 0.112813081 |
| itgb5             | CO349825 | -0.001 | 0.998880188 |
| pitx2             | CO349830 | 0.347  | 0.681340706 |
| si:dkey-208k4.2   | CO349838 | -0.574 | 0.571598616 |
| h3f3a             | CO349846 | -0.52  | 0.054505993 |
| acp5a             | CO349852 | -0.457 | 0.043395667 |
| wu:fi38e01        | CO349865 | -0.581 | 0.154019299 |
| hsd3b7            | CO349867 | -0.656 | 0.037840236 |
| LOC100535118      | CO349868 | -1.015 | 0.056730646 |
| pdia4             | CO349871 | 0.343  | 0.193379266 |
| zp2l1             | CO349878 | -0.522 | 0.194829495 |
| tacc3             | CO349903 | -0.352 | 0.375858721 |
| suc1g1            | CO349907 | -0.265 | 0.588954757 |
| zp2.5             | CO349910 | -1.172 | 0.072240235 |
| LOC100535162      | CO349920 | -0.265 | 0.413031667 |

|                   |          |        |             |
|-------------------|----------|--------|-------------|
| ppp1r14aa         | CO349921 | -0.445 | 0.090036639 |
| si:ch211-234p6.13 | CO349923 | -0.88  | 0.017703467 |
| gdi1              | CO349928 | 0.509  | 0.071071145 |
| zgc:73293         | CO349932 | -0.339 | 0.437591454 |
| birc5b            | CO349939 | -0.673 | 0.283311227 |
| LOC100536898      | CO349940 | -1.033 | 0.068238803 |
| nccrp1            | CO349941 | -0.569 | 0.127329034 |
| mbp               | CO349946 | 0.623  | 0.143798454 |
| btg4              | CO349959 | -0.997 | 0.014217355 |
| wu:fd16e03        | CO349964 | -0.431 | 0.06895962  |
| aurkaip1          | CO349970 | -0.502 | 0.070152336 |
| tpm3              | CO349972 | -0.428 | 0.027144448 |
| vtg2              | CO349976 | 0.435  | 0.179707979 |
| spcs3             | CO349983 | -0.216 | 0.716654859 |
| NA                | CO350003 | 0.324  | 0.403974271 |
| zgc:162969        | CO350009 | -0.434 | 0.567162727 |
| c10orf11          | CO350012 | -0.265 | 0.523302664 |
| usp5              | CO350014 | -0.703 | 0.005336728 |
| si:ch211-145c1.1  | CO350015 | -0.865 | 0.05069052  |
| si:ch211-150o23.2 | CO350033 | -0.673 | 0.273062413 |
| si:ch211-125e6.13 | CO350034 | -1.089 | 0.057135884 |
| si:ch73-189n23.1  | CO350036 | -1.135 | 0.055063736 |
| sumo3b            | CO350045 | -0.905 | 0.190196219 |
| hmg20b            | CO350054 | -0.171 | 0.692956992 |
| socs3a            | CO350055 | 0.088  | 0.945401812 |
| hdgfrp2           | CO350056 | -0.888 | 0.002919512 |
| EIF2S2            | CO350068 | -0.215 | 0.529848083 |
| zgc:110113        | CO350075 | -0.747 | 0.057414664 |
| orc6              | CO350077 | -0.066 | 0.93094233  |
| atp5o             | CO350081 | 0.165  | 0.703217421 |
| zgc:152952        | CO350084 | 0.587  | 0.613783193 |
| oep               | CO350088 | -0.902 | 0.000731829 |
| LOC100333071      | CO350099 | -0.49  | 0.057599272 |
| rbpms2            | CO350100 | 0.087  | 0.913782853 |
| zgc:112980        | CO350103 | -0.118 | 0.841416803 |
| denr              | CO350119 | -0.489 | 0.08205166  |
| lsm1              | CO350123 | -0.421 | 0.218192489 |
| cdc20             | CO350129 | -0.593 | 0.112682247 |
| dad1              | CO350136 | 0.065  | 0.913698347 |
| si:dkey-180p18.9  | CO350145 | 0.444  | 0.087786654 |
| tim8b             | CO350146 | -0.112 | 0.728284751 |
| gpm6aa            | CO350152 | 0.747  | 0.055156091 |
| bzw1a             | CO350155 | -0.649 | 0.026709334 |

|              |          |        |             |
|--------------|----------|--------|-------------|
| rmf111       | CO350167 | -0.875 | 0.008431722 |
| zgc:171717   | CO350186 | -0.941 | 0.135972212 |
| zgc:153243   | CO350212 | -0.62  | 0.010259787 |
| lgals2a      | CO350239 | 0.806  | 0.044407342 |
| zgc:110753   | CO350241 | -0.517 | 0.131331966 |
| pif1         | CO350242 | -0.542 | 0.061266847 |
| wu:fb12c06   | CO350246 | -0.376 | 0.471224621 |
| zgc:110528   | CO350249 | -0.26  | 0.26826927  |
| zgc:171480   | CO350259 | -0.336 | 0.3591858   |
| nasp         | CO350260 | -0.576 | 0.016750756 |
| gng5         | CO350261 | -0.08  | 0.853710554 |
| dtymk        | CO350265 | -0.472 | 0.080008589 |
| calm3a       | CO350277 | -0.611 | 0.341816578 |
| ckbb         | CO350278 | -0.949 | 0.014767567 |
| lgi1a        | CO350279 | -0.781 | 0.012800269 |
| im:7142489   | CO350290 | -0.47  | 0.135633035 |
| zgc:193711   | CO350291 | -0.424 | 0.163678302 |
| atg12        | CO350297 | 0.015  | 0.980809669 |
| NA           | CO350313 | 0.592  | 0.020100669 |
| taf13        | CO350332 | -0.066 | 0.931132832 |
| zgc:56259    | CO350336 | -0.291 | 0.189531676 |
| LOC100150804 | CO350340 | -1.398 | 0.559423825 |
| tuba8l4      | CO350343 | 0.013  | 0.986013528 |
| NA           | CO350346 | 0.518  | 0.296109706 |
| LOC100535162 | CO350347 | -0.367 | 0.412910081 |
| tubb2c       | CO350350 | -0.224 | 0.45635855  |
| zgc:101748   | CO350367 | -0.171 | 0.728284751 |
| rpz2         | CO350370 | 0.083  | 0.926753599 |
| rhogc        | CO350387 | -0.523 | 0.019165497 |
| NA           | CO350397 | -0.019 | 0.982102745 |
| zgc:136336   | CO350402 | -0.13  | 0.749755181 |
| NA           | CO350409 | -0.024 | 0.967779251 |
| id2a         | CO350414 | -0.348 | 0.250665777 |
| LOC100330746 | CO350416 | -0.975 | 0.078490849 |
| ctrb1        | CO350417 | -0.758 | 0.055156091 |
| wee2         | CO350419 | -0.785 | 0.031758002 |
| zgc:109957   | CO350426 | 0.153  | 0.671799742 |
| zgc:153251   | CO350434 | -0.624 | 0.066217612 |
| pou5f1       | CO350445 | -0.658 | 0.02407375  |
| fam136a      | CO350450 | -0.71  | 0.038827035 |
| EIF5A2       | CO350453 | -0.642 | 0.02927217  |
| pi4kb        | CO350456 | 0.554  | 0.090564109 |
| psmb2        | CO350463 | -0.15  | 0.801955316 |

|                   |          |        |             |
|-------------------|----------|--------|-------------|
| si:dkeyp-50f7.2   | CO350498 | -0.966 | 0.075062178 |
| rpp21             | CO350503 | -0.507 | 0.041190103 |
| zgc:56706         | CO350506 | -0.352 | 0.36620763  |
| ppp1r11           | CO350510 | -0.175 | 0.653950591 |
| zgc:112305        | CO350520 | -0.6   | 0.026413226 |
| mfsd2ab           | CO350521 | -0.304 | 0.300872442 |
| si:dkeyp-46h3.2   | CO350524 | -0.776 | 0.048018561 |
| zp2.6             | CO350532 | -1.249 | 0.053840776 |
| gps2              | CO350537 | -0.597 | 0.02434304  |
| zp3c              | CO350538 | -0.897 | 0.10193142  |
| nsun4             | CO350561 | -0.419 | 0.128924278 |
| lhx8a             | CO350568 | -0.04  | 0.971464847 |
| zglp1             | CO350569 | -0.862 | 0.062386382 |
| crfb2             | CO350572 | 0.574  | 0.380937452 |
| uba1              | CO350576 | -0.071 | 0.913782853 |
| zgc:136330        | CO350579 | -0.283 | 0.218192489 |
| chchd10           | CO350585 | -0.456 | 0.332531786 |
| ppp2cb            | CO350590 | -0.384 | 0.224266854 |
| LOC100538094      | CO350598 | -0.368 | 0.287155528 |
| mt2               | CO350599 | -0.279 | 0.738552673 |
| ccnb1             | CO350600 | -0.792 | 0.010624355 |
| cox4i1            | CO350604 | -0.635 | 0.009491635 |
| imp3              | CO350605 | -0.039 | 0.947988082 |
| zgc:85752         | CO350610 | -0.277 | 0.197668447 |
| mrpl22            | CO350622 | -0.064 | 0.861925699 |
| si:dkey-37o8.1    | CO350623 | 0.155  | 0.815785293 |
| im:7158796        | CO350627 | -0.831 | 0.034496457 |
| si:ch211-268m12.6 | CO350631 | 0.015  | 0.981476142 |
| LOC100331957      | CO350661 | -0.181 | 0.687367193 |
| lman2             | CO350665 | -0.822 | 0.011535128 |
| bzw1b             | CO350666 | -0.486 | 0.18583814  |
| zgc:113424        | CO350671 | -0.754 | 0.087857828 |
| fam49bb           | CO350681 | 0.101  | 0.833249781 |
| LOC100334510      | CO350702 | -0.19  | 0.42861899  |
| zgc:114123        | CO350704 | -0.571 | 0.08834328  |
| si:dkey-77a20.7   | CO350708 | 0.159  | 0.504525448 |
| sdhdb             | CO350709 | 0.95   | 0.002555867 |
| NA                | CO350712 | -0.485 | 0.058157763 |
| LOC100534993      | CO350720 | 0.942  | 0.220089522 |
| LOC100534660      | CO350740 | -0.049 | 0.926137702 |
| suz12a            | CO350742 | -0.356 | 0.180259776 |
| btg2              | CO350746 | -0.906 | 0.016877015 |
| zgc:123190        | CO350752 | -0.05  | 0.946000693 |



|                   |          |        |             |
|-------------------|----------|--------|-------------|
| hyou1             | CO350754 | -0.142 | 0.783368069 |
| EIF4E1B           | CO350757 | -0.813 | 0.014217355 |
| SMARCA5           | CO350765 | -0.04  | 0.94940479  |
| MCM2              | CO350769 | -0.192 | 0.795290396 |
| KPNA2             | CO350773 | -0.23  | 0.460525734 |
| NA                | CO350774 | 0.916  | 0.005198007 |
| LOC100333229      | CO350786 | -0.427 | 0.299434403 |
| WU:FI38E01        | CO350790 | -0.348 | 0.606499872 |
| DIS3              | CO350806 | 0.088  | 0.785871382 |
| RETSATL           | CO350808 | -1.06  | 0.119363462 |
| SOD1              | CO352625 | 0.162  | 0.750412594 |
| ZGC:153256        | CO352627 | -0.958 | 0.016445147 |
| NA                | CO352630 | 0.533  | 0.227780503 |
| OLA1              | CO352634 | 0.468  | 0.088699773 |
| PSMB6             | CO352692 | -0.175 | 0.743911372 |
| LGALS3BPB         | CO352707 | 0.494  | 0.489325088 |
| DCUN1D1           | CO352717 | -0.212 | 0.369356515 |
| LOC100334417      | CO352731 | -0.265 | 0.629226405 |
| PDIA3             | CO352736 | 0.555  | 0.110814223 |
| ZGC:77052         | CO352771 | -0.081 | 0.841416803 |
| MAD2L1            | CO352803 | -0.457 | 0.531567788 |
| CREG2             | CO352804 | 0.849  | 0.013697012 |
| H2AFV1            | CO352847 | 0.131  | 0.777851484 |
| LOC100331859      | CO352848 | 0.643  | 0.121046983 |
| PCGF1             | CO352852 | -0.449 | 0.28964726  |
| LMNL3             | CO352873 | 0.158  | 0.764095358 |
| PANE1             | CO352883 | -0.367 | 0.282389902 |
| POLR2D            | CO352891 | -0.186 | 0.680378955 |
| SNRPD3L           | CO352904 | 0.275  | 0.38756763  |
| NUDC              | CO352907 | 0      | 0.999348392 |
| CDADC1            | CO352911 | 0.068  | 0.936486755 |
| HAUS3             | CO352955 | -0.48  | 0.033614551 |
| SI:DKEY-23C22.6   | CO352969 | 0.392  | 0.330974627 |
| H1FX              | CO352972 | 0.723  | 0.040198478 |
| SI:CH211-202H22.6 | CO352973 | 0.091  | 0.91165408  |
| ANXA11A           | CO352997 | 0.529  | 0.017767464 |
| NDUFA4L           | CO353018 | 0.105  | 0.783217626 |
| RFC4              | CO353037 | 1.188  | 0.090556649 |
| NDC80             | CO353062 | -0.269 | 0.404451683 |
| OLA1              | CO353082 | 0.376  | 0.224357185 |
| CLIC4             | CO353091 | 0.097  | 0.906392174 |
| NA                | CO353094 | 0.916  | 0.019165497 |
| LOC100333245      | CO353102 | -0.145 | 0.725107133 |

|              |          |        |             |
|--------------|----------|--------|-------------|
| NA           | CO353103 | 0.075  | 0.851407592 |
| gstp1        | CO353110 | 0.43   | 0.058157763 |
| NA           | CO353114 | 1.211  | 0.080008589 |
| psmd12       | CO353118 | -0.085 | 0.828662094 |
| LOC100332249 | CO353139 | 0.659  | 0.256270413 |
| NA           | CO353146 | 0.087  | 0.897635763 |
| anxa2a       | CO353154 | 0.628  | 0.494047655 |
| degs2        | CO353164 | -0.7   | 0.011421813 |
| rgs5a        | CO353195 | 0.434  | 0.399181353 |
| gas8         | CO353198 | 0.532  | 0.084669454 |
| NA           | CO353222 | 0.238  | 0.562014944 |
| arl3         | CO353238 | -0.074 | 0.93094233  |
| zgc:73328    | CO353247 | -0.226 | 0.491616567 |
| seta         | CO353337 | -0.009 | 0.987650934 |
| NA           | CO353336 | 0.556  | 0.073016885 |
| NA           | CO353329 | 0.877  | 0.015594655 |
| fkbp1aa      | CO353318 | 0.047  | 0.931132832 |
| LOC555512    | CO353317 | 0.26   | 0.286887011 |
| fth1a        | CO353311 | -0.146 | 0.713510838 |
| ccng1        | CO353308 | 0.162  | 0.732426762 |
| tomm20a      | CO353307 | -0.31  | 0.115790109 |
| zgc:56699    | CO353304 | -0.905 | 0.020764407 |
| zgc:56699    | CO353298 | -0.669 | 0.046983851 |
| zgc:110337   | CO353271 | 0.631  | 0.062876768 |
| ldhd         | CO353266 | 0.351  | 0.091401078 |
| cops2        | CO353260 | -0.388 | 0.253354476 |
| acin1a       | CO353427 | 0.224  | 0.629226405 |
| LOC100535659 | CO353401 | 1.167  | 0.068238803 |
| tpm3         | CO353400 | -0.554 | 0.029422993 |
| LOC100535363 | CO353398 | -0.133 | 0.769973826 |
| ran          | CO353386 | 0.349  | 0.17090023  |
| hmgn2        | CO353377 | 0.907  | 0.078485079 |
| NA           | CO353468 | 0.256  | 0.372944243 |
| hnrnpa0      | CO353476 | 0.327  | 0.351929173 |
| ak4          | CO353480 | 0.45   | 0.072153658 |
| NA           | CO353482 | 0.887  | 0.000953499 |
| zgc:123105   | CO353492 | 0.518  | 0.191218397 |
| LOC565998    | CO353503 | 0.955  | 0.040198478 |
| tars         | CO353505 | -0.098 | 0.793413726 |
| NA           | CO353517 | 0.879  | 0.224792473 |
| zgc:136763   | CO353528 | 0.383  | 0.367411009 |
| odf3b        | CO353557 | -0.493 | 0.355542257 |
| zgc:152925   | CO353559 | -0.095 | 0.859921083 |

|                  |          |        |             |
|------------------|----------|--------|-------------|
| LOC100330070     | CO353564 | -0.386 | 0.190288955 |
| cst3             | CO353578 | 0.92   | 0.032944101 |
| zgc:56095        | CO353598 | -0.273 | 0.380937452 |
| rcor1            | CO353622 | -0.033 | 0.955572814 |
| smx5             | CO353623 | -0.021 | 0.982102745 |
| LOC553527        | CO353624 | 0.934  | 0.030941173 |
| cd151            | CO353648 | 0.976  | 0.012734023 |
| rgs5a            | CO353660 | 0.195  | 0.78887184  |
| zgc:153952       | CO353672 | 0.829  | 0.038712414 |
| sec61g           | CO353680 | 0.047  | 0.932603755 |
| NA               | CO353683 | 0.334  | 0.331872615 |
| LOC100147862     | CO353691 | -0.447 | 0.092631464 |
| wu:fc26g07       | CO353698 | 0.556  | 0.092037082 |
| NA               | CO353717 | 0.369  | 0.283599037 |
| tax1bp1b         | CO353722 | 0.704  | 0.029933562 |
| rif1             | CO353749 | -0.204 | 0.740925309 |
| im:7162646       | CO353782 | 0.331  | 0.254763216 |
| zgc:152916       | CO353810 | 0.965  | 0.003650647 |
| NA               | CO353864 | 0.999  | 0.032335355 |
| faub             | CO353903 | -0.281 | 0.649238376 |
| hmgn3            | CO353907 | 0.414  | 0.42567734  |
| NA               | CO353919 | -0.075 | 0.887668346 |
| NA               | CO353968 | 0.414  | 0.050501629 |
| elovl7a          | CO354011 | 0.011  | 0.990222189 |
| zgc:92458        | CO354022 | 0.765  | 0.048018561 |
| si:dkey-25e12.3  | CO354033 | 0.515  | 0.031473692 |
| LOC568334        | CO354040 | 0.543  | 0.043395667 |
| bmpr2a           | CO354068 | 0.583  | 0.100291982 |
| ncf2             | CO354069 | 0.745  | 0.005914836 |
| si:ch211-66i15.4 | CO354078 | 0.852  | 0.021546603 |
| birc5a           | CO354108 | -0.251 | 0.56473897  |
| tagln            | CO354115 | 0.88   | 0.01813956  |
| ppm1h            | CO354127 | 0.869  | 0.012562153 |
| fkbp5            | CO354143 | 1.123  | 0.057142717 |
| LOC100330476     | CO350821 | -0.558 | 0.024930407 |
| zgc:158412       | CO350830 | -0.822 | 0.002984631 |
| gnmt             | CO350833 | 0.402  | 0.202531566 |
| LOC566907        | CO350836 | -0.382 | 0.412946808 |
| hnmpab           | CO350847 | -0.408 | 0.311749739 |
| zp3              | CO350858 | -0.621 | 0.340660947 |
| eif1axa          | CO350862 | -0.446 | 0.148595699 |
| taf9             | CO350872 | -0.379 | 0.464120862 |
| LOC796684        | CO350888 | -0.426 | 0.072852702 |

|                   |          |        |             |
|-------------------|----------|--------|-------------|
| mcl1a             | CO350906 | -0.593 | 0.046559022 |
| zgc:171670        | CO350917 | -1.024 | 0.069194278 |
| rps3              | CO350921 | 0.774  | 0.056730646 |
| zp21l             | CO350923 | -0.588 | 0.255879876 |
| zgc:103652        | CO350931 | -0.551 | 0.041186707 |
| NA                | CO350933 | 0.04   | 0.955806034 |
| lsm14b            | CO350940 | -0.822 | 0.091716838 |
| zgc:173544        | CO350964 | -0.852 | 0.026941735 |
| orc1              | CO350968 | 0.025  | 0.972792998 |
| zgc:162945        | CO350972 | -0.79  | 0.030087989 |
| tp1a              | CO350978 | -0.816 | 0.100217096 |
| zgc:162344        | CO350982 | 0.062  | 0.89729377  |
| LOC100536069      | CO350984 | -0.842 | 0.016445147 |
| LOC556271         | CO350990 | -0.72  | 0.07858468  |
| zgc:92808         | CO351006 | -0.264 | 0.540103161 |
| si:ch211-239j9.2  | CO351008 | 0.014  | 0.980546671 |
| tuba4l            | CO351009 | -0.046 | 0.934024818 |
| zgc:101026        | CO351017 | -0.299 | 0.419735327 |
| vtg1              | CO351022 | -1.001 | 0.290322058 |
| org               | CO351030 | -0.818 | 0.03799832  |
| sap18             | CO351045 | -0.304 | 0.67546238  |
| LOC100535411      | CO351056 | 0.12   | 0.831558318 |
| plp1b             | CO351063 | 0.697  | 0.057197734 |
| LOC571155         | CO351066 | 0.072  | 0.910423161 |
| dvr1              | CO351067 | -0.89  | 0.03453324  |
| thy1              | CO351069 | -0.903 | 0.405134419 |
| si:ch211-69g19.2  | CO351079 | -0.007 | 0.992341285 |
| LOC100534658      | CO351081 | -0.617 | 0.040094246 |
| wu:fc47e11        | CO351084 | -0.541 | 0.126134887 |
| znrd1             | CO351086 | -0.655 | 0.008245053 |
| si:ch211-225p5.3  | CO351089 | -0.217 | 0.528399802 |
| zgc:100919        | CO351092 | -0.544 | 0.0561653   |
| dap1b             | CO351096 | 0.069  | 0.958241555 |
| zgc:56565         | CO351109 | -0.852 | 0.031248865 |
| si:dkey-188i13.1  | CO351115 | -0.037 | 0.967868913 |
| gapdhs            | CO351120 | 0.587  | 0.157904637 |
| wu:fd16d01        | CO351130 | -0.386 | 0.189978502 |
| NA                | CO351158 | 0.157  | 0.60691061  |
| snai1a            | CO351162 | -0.103 | 0.826128995 |
| LOC100000999      | CO351167 | 0.562  | 0.318571034 |
| LOC555475         | CO351168 | -0.995 | 0.013142809 |
| eef2b             | CO351197 | 0.06   | 0.935571786 |
| si:ch211-234p6.13 | CO351198 | -0.391 | 0.358420511 |

|                  |          |        |             |
|------------------|----------|--------|-------------|
| pdhb             | CO351218 | 0.279  | 0.286478618 |
| atp5c1           | CO351232 | 0.051  | 0.934056397 |
| LOC100534948     | CO351287 | 0.928  | 0.003747174 |
| LOC100334439     | CO351289 | -0.612 | 0.013408767 |
| zgc:173837       | CO351317 | -0.61  | 0.036152812 |
| atl3             | CO351372 | -0.665 | 0.009887934 |
| LOC562097        | CO351380 | 0.032  | 0.949932621 |
| zgc:153499       | CO351399 | -0.729 | 0.031987234 |
| mos              | CO351401 | -0.975 | 0.009372196 |
| zgc:163047       | CO351422 | 0.301  | 0.432593695 |
| LOC100536090     | CO351425 | -0.019 | 0.982102745 |
| LOC560808        | CO351447 | 0.257  | 0.375622565 |
| ola1             | CO351453 | 0.036  | 0.93858397  |
| galcb            | CO351474 | -0.227 | 0.533990318 |
| zgc:92261        | CO351499 | 0.048  | 0.952721573 |
| LOC100536577     | CO351506 | 0.525  | 0.083525767 |
| zgc:162431       | CO351508 | 0.637  | 0.108155599 |
| il13ra2          | CO351514 | -0.497 | 0.444432227 |
| lsm11            | CO351518 | -0.558 | 0.221270008 |
| rpl7l1           | CO351519 | -0.382 | 0.179806316 |
| LOC100535616     | CO351530 | -1.023 | 0.054196806 |
| zgc:110304       | CO351533 | 0.169  | 0.802662825 |
| tpst1            | CO351543 | 0.745  | 0.008431722 |
| wu:fi04f09       | CO351552 | -0.014 | 0.990175261 |
| LOC100004563     | CO351560 | -0.009 | 0.989927548 |
| aurkb            | CO351563 | -0.695 | 0.016439834 |
| sec61a1          | CO351567 | 0.772  | 0.002917278 |
| smn1             | CO351568 | -0.397 | 0.069449796 |
| btr04            | CO351572 | -0.232 | 0.413031667 |
| zgc:77767        | CO351578 | -0.743 | 0.009085503 |
| zgc:112231       | CO351579 | -0.215 | 0.552715435 |
| cyp11a1          | CO351589 | -0.48  | 0.176473355 |
| si:dkey-170i10.1 | CO351591 | -0.49  | 0.049455406 |
| NA               | CO351593 | -0.432 | 0.528600589 |
| si:dkeyp-94h10.5 | CO351603 | -0.143 | 0.566920006 |
| NA               | CO351611 | -0.43  | 0.157460834 |
| rbm4.1           | CO351615 | -0.19  | 0.768443363 |
| shfm1            | CO351618 | -0.024 | 0.968178953 |
| LOC100006146     | CO351636 | -0.082 | 0.89729377  |
| mrpl17           | CO351637 | -0.466 | 0.063939554 |
| si:dkey-181i3.3  | CO351640 | 0.3    | 0.526362975 |
| si:dkey-97o5.1   | CO354150 | -0.73  | 0.162414843 |
| zgc:112397       | CO354162 | -0.623 | 0.395710101 |

|                   |          |        |             |
|-------------------|----------|--------|-------------|
| zgc:114119        | CO354192 | -0.348 | 0.363046438 |
| zgc:101748        | CO354193 | -0.233 | 0.408628345 |
| krt4              | CO354256 | 1.112  | 0.189531676 |
| akap8l            | CO354263 | 0.186  | 0.748881259 |
| hexim1            | CO354276 | 0.53   | 0.084051114 |
| nutf2l            | CO354283 | -0.624 | 0.020100669 |
| zgc:153629        | CO354303 | 1.32   | 0.086652979 |
| nol6              | CO354330 | -0.285 | 0.203212089 |
| usp36             | CO354344 | 0.522  | 0.077542154 |
| LOC569147         | CO354351 | 0.837  | 0.002819764 |
| retsat            | CO354360 | 0.581  | 0.060757118 |
| LOC100151157      | CO354374 | 0.049  | 0.940175133 |
| cfr               | CO354389 | 0.336  | 0.354402289 |
| si:ch211-127n13.2 | CO354391 | -0.022 | 0.987650934 |
| NA                | CO354398 | 0.392  | 0.11967645  |
| zgc:101581        | CO354402 | 0.702  | 0.038827035 |
| ppp2cb            | CO354410 | -0.137 | 0.786229357 |
| serbp1            | CO354428 | 0.616  | 0.051076828 |
| esco2             | CO354508 | -0.281 | 0.301671265 |
| NA                | CO354565 | -0.297 | 0.370581964 |
| thoc6             | CO354579 | -0.356 | 0.218090044 |
| zgc:73380         | CO354601 | 0.023  | 0.97424011  |
| gpd1l             | CO354622 | 0.754  | 0.104957542 |
| kif23             | CO354625 | 0.098  | 0.849342472 |
| zgc:92648         | CO354628 | -0.4   | 0.046285023 |
| LOC799177         | CO354638 | -0.703 | 0.071228351 |
| zgc:112425        | CO354648 | 0.527  | 0.16653491  |
| im:7142942        | CO354667 | -0.57  | 0.036195613 |
| LOC100536039      | CO354678 | -0.258 | 0.432871458 |
| LOC100537823      | CO354682 | -0.035 | 0.946772771 |
| LOC100535659      | CO354733 | 0.988  | 0.078485079 |
| si:ch211-241p10.1 | CO354735 | 0.048  | 0.949171716 |
| zgc:110645        | CO354753 | 0.16   | 0.765971863 |
| nid1a             | CO354764 | 1.07   | 0.234141378 |
| zgc:55461         | CO354786 | -0.027 | 0.976359426 |
| smg7              | CO354840 | 0.975  | 0.001841541 |
| LOC100534665      | CO354869 | -0.283 | 0.29550132  |
| si:dkey-52k20.7   | CO354886 | 1.758  | 0.072852702 |
| hspa8             | CO354958 | -0.395 | 0.186706305 |
| NA                | CO354963 | 0.592  | 0.0561653   |
| NA                | CO354980 | 0.223  | 0.669993133 |
| vbp1              | CO355019 | -0.565 | 0.126671097 |
| ywhaqa            | CO355039 | -0.219 | 0.784639744 |

|                    |          |        |             |
|--------------------|----------|--------|-------------|
| NA                 | CO355072 | -0.104 | 0.853334075 |
| LOC100538089       | CO355074 | 0.912  | 0.051996121 |
| aurka              | CO355111 | -0.236 | 0.484461238 |
| LOC572312          | CO355112 | -0.318 | 0.399081433 |
| zgc:123339         | CO355125 | 0.009  | 0.996451012 |
| NA                 | CO355133 | 0.809  | 0.012934277 |
| zgc:171959         | CO355135 | 0.069  | 0.913434464 |
| cfdl               | CO355141 | 1.302  | 0.192545871 |
| EIF4G2B            | CO355175 | -0.226 | 0.731010082 |
| flj110111          | CO355176 | -0.623 | 0.013408767 |
| NA                 | CO355180 | 0.975  | 0.038712414 |
| LOC100536508       | CO355194 | -0.242 | 0.450353775 |
| ak2                | CO355206 | 0.114  | 0.841416803 |
| podxl              | CO355218 | 0.69   | 0.197980197 |
| NA                 | CO355227 | 0.521  | 0.169713892 |
| tmem231            | CO355250 | -0.227 | 0.526730787 |
| farsb              | CO355265 | 0.238  | 0.367150912 |
| lifra              | CO355307 | 0.539  | 0.0096041   |
| zgc:92533          | CO355310 | -0.175 | 0.935865221 |
| arpc2              | CO355316 | 0.209  | 0.410761943 |
| LOC100002956       | CO355342 | 0.202  | 0.484138311 |
| fxyd1              | CO355345 | 0.301  | 0.220849766 |
| FCER1GL            | CO355346 | 0.222  | 0.640926826 |
| tagln2             | CO355354 | 0.705  | 0.081356144 |
| NA                 | CO355373 | 0.26   | 0.316322495 |
| NA                 | CO355381 | 0.522  | 0.375858721 |
| ugeg               | CO355394 | 0.21   | 0.645402812 |
| EIF3B              | CO355398 | 0.016  | 0.979398809 |
| coro1a             | CO355400 | 0.109  | 0.811413779 |
| mmp2               | CO355454 | -0.027 | 0.982102745 |
| thrap6             | CO355490 | 0.158  | 0.863184456 |
| vdac2              | CO355519 | 0.578  | 0.021184529 |
| nfil3              | CO355523 | 0.193  | 0.477665071 |
| NA                 | CO355532 | 0.193  | 0.599067906 |
| rps28              | CO355542 | 0.729  | 0.037578259 |
| lsmd1              | CO355543 | -0.038 | 0.952721573 |
| dpys               | CO355560 | 0.956  | 0.002393677 |
| eno1               | CO355562 | 0.812  | 0.002466041 |
| sept7a             | CO355593 | 0.25   | 0.626631511 |
| fn1b               | CO355598 | 0.559  | 0.116733064 |
| LOC100332577       | CO355615 | 0.45   | 0.071904168 |
| arhgdia            | CO355616 | 0.829  | 0.00193209  |
| si:ch1073-459j12.1 | CO355623 | 0.293  | 0.370581964 |

|                  |          |        |             |
|------------------|----------|--------|-------------|
| appb             | CO355640 | 0.504  | 0.276707435 |
| LOC100536095     | CO355651 | 0.668  | 0.038827035 |
| atp2a3           | CO355691 | 0.141  | 0.704957403 |
| pa2g4b           | CO355706 | 0.037  | 0.94940479  |
| hp1bp3           | CO355711 | 0.477  | 0.083227543 |
| kal1a            | CO355716 | 0.302  | 0.311749739 |
| slc7a3           | CO355717 | 0.408  | 0.299950335 |
| ssr4             | CO355744 | 0.499  | 0.093750858 |
| psmd4a           | CO355770 | 0.723  | 0.025843044 |
| flna             | CO355792 | 0.307  | 0.416214028 |
| arhgef19         | CO355804 | 0.894  | 0.008768755 |
| rplp2            | CO355819 | 0.503  | 0.224974036 |
| LOC558023        | CO355825 | 0.542  | 0.05179263  |
| NA               | CO355836 | 0.183  | 0.572122427 |
| LOC100535251     | CO355892 | 0.235  | 0.405796037 |
| NA               | CO355921 | -0.002 | 0.998093436 |
| rbmx             | CO355988 | -0.934 | 0.001841541 |
| carhsp1          | CO356006 | -0.271 | 0.38756763  |
| inka1b           | CO356024 | -0.816 | 0.029551521 |
| nucb2b           | CO356030 | 0.195  | 0.64603531  |
| NA               | CO356081 | 0.223  | 0.563208133 |
| ttc9c            | CO356096 | -0.161 | 0.626825768 |
| zgc:174710       | CO356101 | -0.097 | 0.857611799 |
| NA               | CO356117 | -0.047 | 0.934056397 |
| ormdl1           | CO356128 | -0.271 | 0.441859541 |
| LOC100534734     | CO356143 | 0.078  | 0.904420746 |
| mf32             | CO355169 | -0.195 | 0.783968861 |
| zgc:56419        | CO355357 | -0.477 | 0.526166133 |
| umps             | CO355426 | -0.546 | 0.063109074 |
| nap1l1           | CO355704 | -0.43  | 0.133139758 |
| LOC553366        | CO356182 | -0.832 | 0.01590411  |
| zgc:110380       | CO356194 | 1.036  | 0.054505993 |
| fam177a1         | CO356208 | -0.041 | 0.95228721  |
| insl3            | CO356213 | -0.162 | 0.761746259 |
| si:dkey-42i9.10  | CO356262 | 0.615  | 0.053546992 |
| NA               | CO356277 | 0.816  | 0.024666259 |
| LOC561889        | CO356292 | -0.1   | 0.834394626 |
| NA               | CO356294 | 0.47   | 0.117852851 |
| msh2             | CO356357 | -0.105 | 0.805159617 |
| cse1l            | CO356400 | -0.081 | 0.882153708 |
| si:dkey-211e20.8 | CO356401 | 0.098  | 0.765971863 |
| uba2             | CO356417 | -0.241 | 0.416549681 |
| NA               | CO356440 | 0.54   | 0.299434403 |



|                  |          |        |             |
|------------------|----------|--------|-------------|
| coro1ca          | EV562737 | 0.043  | 0.955917073 |
| LOC100005937     | EV562757 | -0.221 | 0.527713406 |
| tpd52            | EV562790 | 0.307  | 0.494770697 |
| lxn              | EV562836 | 0.405  | 0.617713439 |
| hmg1a            | EV562863 | -0.232 | 0.485024484 |
| arrdc3b          | EV562866 | 0.402  | 0.17090023  |
| NA               | EV562968 | 0.321  | 0.325258602 |
| zgc:92201        | EV562985 | -0.415 | 0.116946729 |
| LOC100537801     | EV562999 | -0.305 | 0.481309341 |
| NA               | EV563019 | -0.101 | 0.853710554 |
| pppde1           | EV563037 | -0.332 | 0.231512833 |
| dkk3             | EV563068 | 0.411  | 0.567919868 |
| obfc2ab          | EV563104 | -0.597 | 0.01062382  |
| pla2g15          | EV563105 | -0.028 | 0.971726076 |
| LOC100330285     | EV563204 | -0.388 | 0.330654704 |
| NA               | EV563224 | 0.287  | 0.666790252 |
| chd              | EV563263 | 0.613  | 0.517446914 |
| cep5711          | EV563307 | 0.078  | 0.826120195 |
| EIF4G2B          | EV563319 | 0.129  | 0.734303024 |
| LOC100331428     | EV563321 | 0.975  | 0.08343889  |
| zgc:92763        | EV563334 | 0.283  | 0.472114447 |
| zgc:101819       | EV563526 | -0.025 | 0.96505152  |
| slc25a12         | EV563548 | -0.123 | 0.775800915 |
| tdrd7            | EV563554 | 0.233  | 0.433226861 |
| NA               | EV563589 | 1.026  | 0.116614827 |
| spc25            | EV563681 | -0.258 | 0.401341275 |
| NA               | EV563687 | 0.566  | 0.200751224 |
| ik:tdsubc_1b12   | EV563715 | 0.586  | 0.329105925 |
| NA               | EV563719 | 0.324  | 0.585919672 |
| zgc:77517        | EV563744 | 0.766  | 0.107980329 |
| si:dkey-250123.2 | EV563915 | 0.22   | 0.830981581 |
| trim44           | EV563917 | 0.484  | 0.267825133 |
| NA               | EV563945 | 0.309  | 0.394823096 |
| gins3            | EV564065 | -0.314 | 0.288252797 |
| LOC100537338     | EV564099 | 0.954  | 0.003014754 |
| zgc:109986       | EV564130 | 0.772  | 0.008428862 |
| dars             | EV564137 | 0.624  | 0.040795926 |
| akr1a1a          | EV564263 | 1.096  | 0.087786654 |
| mfap2            | EV564271 | 0.957  | 0.071123335 |
| znhit1           | EV564286 | 0.021  | 0.970791488 |
| gpib             | EV564297 | 0.774  | 0.093705644 |
| ska3             | EW680229 | 0.672  | 0.026075471 |
| katnal2          | EV564486 | -0.469 | 0.258227078 |

|                  |          |        |             |
|------------------|----------|--------|-------------|
| zgc:136474       | EV564515 | 0.493  | 0.108313639 |
| prdx1            | EV564608 | -0.434 | 0.426535035 |
| abcc5            | EV564698 | 0.304  | 0.567162727 |
| LOC100536178     | EV564750 | 0.019  | 0.98427946  |
| zgc:175264       | EV564783 | 0.175  | 0.630106452 |
| LOC572121        | EV564859 | -0.033 | 0.977562608 |
| zgc:162576       | EV564862 | 0.655  | 0.200069699 |
| anxa1a           | EV564897 | 1.067  | 0.16967398  |
| asmtl            | EV564972 | 0.62   | 0.048018561 |
| nfr              | EV565012 | -0.746 | 0.013173232 |
| NA               | EV565045 | 0.469  | 0.384001892 |
| zgc:174506       | EV565091 | -0.137 | 0.741612801 |
| tdrd7            | EV565152 | 0.12   | 0.78777439  |
| tram2            | EV854406 | -0.757 | 0.01590411  |
| anapc5           | CO350287 | 0.018  | 0.98427946  |
| hspa5            | CO350325 | -0.077 | 0.90363568  |
| ranbp1           | CO350633 | -0.362 | 0.524546632 |
| zgc:158363       | CO351219 | -0.19  | 0.804414068 |
| LOC797855        | CO351351 | -0.179 | 0.764208914 |
| srsf6a           | CO351471 | 0.221  | 0.537794868 |
| myh9a            | CO351476 | -0.097 | 0.926059742 |
| dynll1           | CO351562 | -0.327 | 0.399482563 |
| zgc:193933       | CO351641 | -0.379 | 0.386385989 |
| cx43.4           | CO351666 | -0.448 | 0.35985492  |
| NA               | CO351682 | -0.08  | 0.809196356 |
| marcksb          | CO351683 | -0.557 | 0.52216369  |
| zgc:136338       | CO351704 | 0.41   | 0.284767591 |
| map2k4b          | CO351708 | 0.51   | 0.087150162 |
| zgc:153409       | CO351716 | 0.307  | 0.807934465 |
| sybu             | CO351745 | -0.808 | 0.09873676  |
| si:dkeyp-114g9.1 | CO351761 | 0.005  | 0.994012944 |
| haus1            | EV854438 | -0.424 | 0.366104279 |
| zgc:86598        | EV854475 | 0.474  | 0.081731335 |
| EIF4G2A          | EV854489 | -0.181 | 0.645402812 |
| npdc1            | EV854514 | -0.364 | 0.418073796 |
| LOC100534876     | EV854527 | -0.589 | 0.11201286  |
| NA               | CO352780 | -0.018 | 0.977604715 |
| ccdc65           | CO352979 | 0.185  | 0.547326112 |
| nhp211           | EV854552 | -0.688 | 0.037578259 |
| LOC100330652     | EV854561 | -0.434 | 0.232557726 |
| prmt10           | EV854625 | 0.037  | 0.955917073 |
| dkk3             | EV854629 | 0.591  | 0.327836899 |
| NA               | CO353290 | -0.712 | 0.036391113 |

|              |          |        |             |
|--------------|----------|--------|-------------|
| NA           | CO353295 | -0.707 | 0.065102253 |
| traf1        | CO353310 | -0.488 | 0.169713892 |
| ccni         | CO353963 | 0.789  | 0.058536316 |
| gtf2a1       | CO354110 | -0.388 | 0.258702668 |
| LOC100148221 | CO354304 | -0.552 | 0.021018333 |
| LOC100534948 | CO354573 | 0.589  | 0.394823096 |
| NA           | EV555200 | 0.633  | 0.065800873 |
| zgc:152965   | EV555280 | -0.098 | 0.722429783 |
| spon1b       | EV555281 | -0.274 | 0.64585754  |
| arhgap10     | EV555302 | -0.485 | 0.079047419 |
| dus4l        | EV555312 | -0.331 | 0.298099037 |
| nsmce4a      | EV555316 | -0.339 | 0.209701811 |
| NA           | EV555342 | 0.342  | 0.341176041 |
| net1         | EV555400 | -0.032 | 0.968588295 |
| nrxn1b       | EV555435 | 0.698  | 0.057574367 |
| pabpc1l      | EV555460 | -0.515 | 0.179707979 |
| NA           | EV555474 | 0.988  | 0.038375054 |
| rnaseh1      | EV555500 | -0.723 | 0.001556381 |
| zgc:56200    | EV555588 | -0.196 | 0.684834614 |
| zgc:110584   | EV555611 | -0.255 | 0.36239342  |
| ppm1g        | EV555620 | 0.102  | 0.879051863 |
| isoc2        | EV555656 | 1.098  | 0.089572352 |
| LOC100333064 | EV555662 | 0.126  | 0.676437895 |
| NA           | EV555752 | 0.443  | 0.481309341 |
| zplxdc2      | EV555791 | 0.917  | 0.005428861 |
| hspd1        | EV555803 | 0.431  | 0.119623152 |
| zgc:154068   | EV555827 | -0.163 | 0.606499872 |
| NA           | EV555828 | 0.604  | 0.298047944 |
| postn        | EV555843 | -0.191 | 0.768443363 |
| cars         | EV555849 | 0.009  | 0.99387636  |
| c6           | EV555855 | 0.487  | 0.418606507 |
| LOC100332626 | EV556004 | -0.497 | 0.205668232 |
| LOC100536370 | EV556023 | 0.594  | 0.218192489 |
| zgc:56072    | EV556032 | 0.17   | 0.706507914 |
| rpl10        | EV556040 | -0.127 | 0.815785293 |
| zgc:114041   | EV556109 | -0.199 | 0.647429467 |
| atic         | EV556151 | -0.022 | 0.979494409 |
| wu:fj39b01   | EV556172 | 0.537  | 0.381125843 |
| cat          | EV556193 | 0.259  | 0.687732215 |
| NA           | EV556258 | -0.893 | 0.034731329 |
| zgc:55843    | EV556341 | -0.184 | 0.525158777 |
| zgc:171795   | EV556373 | 0.054  | 0.903766864 |
| NA           | EV556418 | 0.395  | 0.247152024 |

|                   |          |        |             |
|-------------------|----------|--------|-------------|
| NA                | EV556427 | 0.057  | 0.931402973 |
| s100a1            | EV556428 | -0.751 | 0.073659353 |
| LOC567678         | EV556445 | -0.672 | 0.210511805 |
| lsm8              | EV556454 | 0.072  | 0.852853804 |
| EIF3S6IP          | EV556478 | -0.074 | 0.860762194 |
| AP1G1             | EV556527 | -0.238 | 0.610178357 |
| TCEB1A            | EV556528 | -0.078 | 0.853213473 |
| LOC100535842      | EV556631 | -0.887 | 0.12733685  |
| LOC100334599      | EV556646 | 0.889  | 0.237266104 |
| EIF4E             | EV556736 | 0.034  | 0.949932621 |
| IARS              | EV556757 | 0.169  | 0.585362587 |
| TMEM144B          | EV556857 | -0.224 | 0.441859541 |
| ZGC:66449         | EV556911 | -0.082 | 0.873421224 |
| BUD31             | EV557026 | -0.647 | 0.029616982 |
| NA                | EV557061 | 0.139  | 0.880219845 |
| SI:CH211-105D11.3 | EV557072 | 0.095  | 0.791196077 |
| PA2G4A            | EV557095 | 0.661  | 0.03151793  |
| ZGC:123274        | EV557098 | 0.745  | 0.03857221  |
| NA                | EV557113 | 0.414  | 0.144801417 |
| NMT1A             | EV557137 | -0.203 | 0.64585754  |
| NA                | EV557153 | -0.497 | 0.078485079 |
| LOC100333953      | EV557161 | -0.62  | 0.031126363 |
| NA                | EV557166 | -0.5   | 0.287234009 |
| SI:DKEY-261H17.1  | EV557366 | -0.16  | 0.794209681 |
| IDE               | EV557410 | -0.271 | 0.36239342  |
| SI:CH211-214P16.1 | EV557421 | 0.361  | 0.231043381 |
| BNIP3LB           | EV557432 | 0.514  | 0.104428708 |
| BACTIN2           | CO353568 | 0.044  | 0.973405315 |
| ZGC:103482        | EV557619 | -0.416 | 0.116294563 |
| PUS3              | EV557625 | -0.358 | 0.166056928 |
| ZGC:152968        | EV557648 | 0.497  | 0.201911641 |
| SI:CH211-155K24.6 | EV557650 | -0.276 | 0.526730787 |
| PLK1              | EV557668 | -0.418 | 0.171784487 |
| GINS2             | EV557676 | -0.916 | 0.008810036 |
| DND               | EV557789 | 0.043  | 0.96545664  |
| DND               | EV557793 | -0.011 | 0.988643015 |
| ZGC:103482        | EV557820 | -0.442 | 0.153990024 |
| RCC1              | EV557822 | -0.565 | 0.036172087 |
| CISD1             | EV557867 | 0.291  | 0.691940052 |
| PLXND1            | EV557879 | 0.528  | 0.140082413 |
| ZGC:77714         | EV557923 | 0.308  | 0.430557701 |
| LOC559576         | EV557932 | 0.556  | 0.127022112 |
| ZGC:56280         | EV557937 | 0.254  | 0.584290346 |

|                   |          |        |             |
|-------------------|----------|--------|-------------|
| LOC100003370      | EV558037 | -0.733 | 0.012143924 |
| NA                | EV558066 | -0.145 | 0.834394626 |
| ddx6              | EV558091 | 0.183  | 0.791196077 |
| NA                | EV558093 | 0.7    | 0.012779625 |
| si:ch211-155k24.6 | EV558187 | -0.504 | 0.230869581 |
| anxa11b           | EV558201 | 0.259  | 0.491663078 |
| cdc45             | EV558232 | -0.239 | 0.422016575 |
| dnmt1             | EV558233 | -0.989 | 0.002819764 |
| dynll2a           | EV558258 | 0.115  | 0.834394626 |
| rrm2              | EV558295 | -0.761 | 0.013548035 |
| NA                | EV558323 | -0.585 | 0.078485079 |
| zgc:158852        | EV558329 | -0.773 | 0.012800269 |
| LOC100002476      | EV558365 | -0.214 | 0.860604692 |
| LOC100334424      | EV558447 | -0.39  | 0.365355178 |
| si:dkey-42i9.8    | EV558455 | -0.724 | 0.067493216 |
| pepd              | EV558463 | -1.16  | 0.064984996 |
| anp32b            | EV558558 | -0.232 | 0.600571768 |
| hmgb2a            | EV558567 | -0.09  | 0.874025574 |
| LOC100536708      | EV558573 | -0.107 | 0.787685466 |
| zgc:152928        | EV558579 | 0.08   | 0.913782853 |
| eml2              | EV558608 | -0.536 | 0.087334394 |
| fbxo11-like       | EV558622 | -0.643 | 0.025702663 |
| LOC100536529      | EV558643 | -0.258 | 0.533405954 |
| bactin2           | CO353568 | 0.111  | 0.903766864 |
| si:dkey-276i5.1   | EV558750 | 0.709  | 0.023436883 |
| dab2              | EV558797 | -0.567 | 0.437591454 |
| si:dkey-192o1.2   | EV558802 | -0.958 | 0.007648607 |
| sart3             | EV558814 | -0.251 | 0.440790818 |
| zgc:56231         | EV558847 | -0.986 | 0.011410492 |
| nup43             | EV558854 | -0.191 | 0.589369232 |
| NA                | EV558909 | -0.93  | 0.026709334 |
| snrpd1            | EV558979 | 0.514  | 0.166042347 |
| NA                | EV559006 | 1.078  | 0.09346974  |
| zgc:171667        | EV559033 | 0.677  | 0.044424241 |
| pold2             | EV559135 | -0.793 | 0.00655523  |
| zgc:173742        | EV559186 | 0.404  | 0.34307105  |
| NA                | EV559189 | -0.708 | 0.084481776 |
| zgc:55888         | EV559300 | -0.41  | 0.201503917 |
| si:ch211-67e16.9  | EV559306 | -0.277 | 0.489517469 |
| si:ch211-239e6.4  | EV559308 | -0.922 | 0.019165497 |
| LOC556026         | EV559355 | -0.018 | 0.984629905 |
| rrm1              | EV559365 | -0.264 | 0.503454077 |
| fgfr11b           | EV559378 | -0.739 | 0.242975183 |

|              |          |        |             |
|--------------|----------|--------|-------------|
| LOC100002916 | EV559386 | -0.165 | 0.495120174 |
| zar1         | EV559391 | -0.887 | 0.128228327 |
| zgc:55877    | EV559435 | -0.664 | 0.042094464 |
| tipin        | EV559743 | -0.727 | 0.006944067 |
| lamp2        | EV559754 | -0.661 | 0.040821439 |
| zgc:158856   | EV559775 | -0.867 | 0.01764688  |
| LOC799904    | EV559816 | 0.246  | 0.530858727 |
| eme1         | EV559873 | -0.286 | 0.299870544 |
| gpr160       | EV559910 | -0.525 | 0.093401085 |
| slc16a3      | EV560034 | -0.295 | 0.589869026 |
| ccnh         | EV560100 | -0.574 | 0.013930939 |
| zgc:113293   | EV560102 | -0.723 | 0.012562153 |
| EIF4EBP3     | EV560113 | 0.363  | 0.563208133 |
| zgc:101851   | EV560211 | 0.095  | 0.846111136 |
| wu:fi42e03   | EV560294 | -0.875 | 0.031185357 |
| zgc:113200   | EV560398 | 0.178  | 0.776244948 |
| zgc:77112    | EV560453 | -0.645 | 0.135633035 |
| clu          | EV560454 | 0.005  | 0.997490297 |
| LOC569642    | EV560472 | -0.852 | 0.06913732  |
| LOC100537662 | EV560480 | -0.075 | 0.893205227 |
| EIF4ENIF1    | EV560519 | -0.625 | 0.040776926 |
| zgc:86764    | EV560550 | -0.482 | 0.104428708 |
| fmn2b        | EV560613 | 0.071  | 0.914157093 |
| fdx1         | EV560623 | -0.15  | 0.765971863 |
| ddx6         | EV560633 | 0.028  | 0.98164737  |
| zgc:55781    | EV560688 | -0.216 | 0.644926509 |
| zgc:162200   | EV560692 | 0.688  | 0.219202556 |
| mcf2a        | EV560708 | -0.943 | 0.00816685  |
| mxra8a       | EV560738 | -0.27  | 0.707686204 |
| h2afv        | EV560934 | -0.89  | 0.003435629 |
| NA           | EV560955 | -0.986 | 0.017567351 |
| ndufa8       | EV560966 | -0.062 | 0.913782853 |
| dkc1         | EV561049 | 0.037  | 0.970137932 |
| NA           | EV561168 | 0.051  | 0.934056397 |
| ell2         | EV561207 | -0.544 | 0.13326951  |
| zgc:110307   | EV561216 | -0.756 | 0.027587997 |
| sybu         | EV561220 | -0.537 | 0.135633035 |
| NA           | EV561239 | -0.891 | 0.112495415 |
| LOC100535261 | EV561241 | -1.033 | 0.29086882  |
| rmf111       | EV561246 | -0.526 | 0.055943654 |
| ppfia3       | EV561259 | -0.833 | 0.06425532  |
| LOC100536069 | EV561289 | 0.41   | 0.4268045   |
| zgc:103738   | EV561303 | 0.474  | 0.237017578 |

|                   |          |        |             |
|-------------------|----------|--------|-------------|
| tram2             | EV561310 | -0.482 | 0.028812006 |
| tubb5             | EV561318 | -0.147 | 0.782169309 |
| smc4              | EV561367 | -0.285 | 0.375622565 |
| mcm3l             | EV561418 | -0.855 | 0.005987807 |
| rpl27             | EV561475 | -0.893 | 0.007698171 |
| rdh10b            | EV561565 | -0.959 | 0.005336728 |
| NA                | EV603090 | 1.04   | 0.075341975 |
| NA                | EV603125 | -0.294 | 0.405134419 |
| mrpl36            | EV603209 | 0.009  | 0.989994061 |
| phf5a             | EV603233 | -0.068 | 0.875598684 |
| LOC564151         | EV603238 | 0.089  | 0.854491047 |
| LOC100535971      | EV603252 | -0.729 | 0.047399455 |
| atpif1            | EV603257 | -0.415 | 0.173381156 |
| NA                | EV603272 | -0.187 | 0.639647709 |
| LOC796580         | EV603345 | -0.832 | 0.040198478 |
| rps2              | EV603363 | 0.739  | 0.060177164 |
| cenpa             | EV603414 | -0.411 | 0.034528132 |
| NA                | EV603423 | 0.149  | 0.796877423 |
| LOC100002545      | EV854363 | -0.292 | 0.42283084  |
| zgc:113070        | EV603470 | -0.088 | 0.949932621 |
| h2afx             | EV854365 | -0.848 | 0.018202937 |
| hmga1a            | EV603500 | -0.134 | 0.764508086 |
| zgc:103481        | EV603561 | -0.635 | 0.367430413 |
| LOC100332020      | EV854368 | -0.668 | 0.489572755 |
| NA                | EV603600 | -0.882 | 0.041049921 |
| alas1             | EV603611 | -0.345 | 0.373903027 |
| si:ch211-173p18.2 | EV603661 | -1.062 | 0.092479598 |
| LOC100004510      | EV603662 | -0.309 | 0.554565996 |
| npm2              | EV603717 | -0.292 | 0.569416089 |
| si:dkey-8l13.1    | EV606518 | -0.581 | 0.112813081 |
| ccna1             | EV854371 | -0.866 | 0.054155475 |
| cldnd             | EV603732 | -1.12  | 0.059867938 |
| LOC100535587      | EV603782 | 0.004  | 0.994422311 |
| g3bp1             | EV854375 | -0.136 | 0.703020527 |
| uchl1             | EV854376 | -0.751 | 0.130660113 |
| vim               | EV603914 | 0.468  | 0.315242635 |
| NA                | EV603934 | -0.663 | 0.285298573 |
| zgc:86839         | EV854382 | -0.499 | 0.067106044 |
| NA                | EV854383 | -0.436 | 0.129901484 |
| NA                | EV603962 | -0.076 | 0.905602973 |
| cfl2l             | EV603981 | 0.18   | 0.762500321 |
| parn              | EV603982 | -0.089 | 0.879526101 |
| pdcd4b            | EV603993 | -0.568 | 0.330356578 |

|                  |          |        |             |
|------------------|----------|--------|-------------|
| azin1b           | EV604024 | 0.035  | 0.963934356 |
| pdgfr1           | EV604120 | 0.38   | 0.575650768 |
| eme1             | EV604256 | -0.385 | 0.157900218 |
| asb3             | EV604278 | 0.079  | 0.913698347 |
| NA               | EV604282 | 0.531  | 0.097346799 |
| marveld2a        | EV604286 | -0.72  | 0.036219772 |
| zgc:153362       | EV604332 | -0.675 | 0.044912132 |
| si:ch211-12e13.2 | EV606521 | -0.18  | 0.786193829 |
| LOC100002387     | EV604356 | -0.504 | 0.056746078 |
| LOC100331651     | EV604359 | -0.126 | 0.869335066 |
| ap2a1            | EV604361 | -1     | 0.002038716 |
| LOC568145        | EV604369 | -0.453 | 0.274442664 |
| cth1             | EV854394 | -0.281 | 0.618628861 |
| pdc7             | EV604424 | -0.188 | 0.573300652 |
| NA               | EV604426 | -0.725 | 0.014217355 |
| zgc:123180       | EV604432 | -0.735 | 0.032741945 |
| mycl1a           | EV604462 | 0.144  | 0.861836641 |
| cdca8            | EV604463 | -0.531 | 0.158028123 |
| hmmr             | EV604497 | -0.321 | 0.216022001 |
| ankrd10a         | EV604514 | -0.198 | 0.427331448 |
| bub3             | EV604520 | -0.712 | 0.038712414 |
| cbx3a            | EV604597 | -0.187 | 0.533312182 |
| NA               | EV604605 | -0.57  | 0.150906049 |
| h1m              | EV854398 | -0.885 | 0.073733341 |
| NA               | EV604654 | 0.595  | 0.472888426 |
| zgc:122991       | EV604688 | -0.99  | 0.00580863  |
| ca15b            | EV604784 | -0.797 | 0.013591308 |
| zgc:77241        | EV604798 | -0.677 | 0.045554781 |
| brd2a            | EV604809 | -0.354 | 0.216102724 |
| si:ch211-12e13.2 | EV604837 | -0.418 | 0.492815104 |
| zgc:56231        | EV604907 | -0.441 | 0.48980027  |
| pkig             | EV604912 | -0.654 | 0.018997573 |
| idh2             | EV604920 | 0.851  | 0.014316778 |
| ywhabb           | EV604934 | 0.16   | 0.739262224 |
| fermt1           | EV604935 | -0.462 | 0.093059407 |
| fkbp1ab          | EV604955 | -0.319 | 0.347737539 |
| LOC100537720     | EV605039 | -0.704 | 0.056136546 |
| LOC569097        | EV605161 | 0.067  | 0.885181569 |
| polr3c           | EV605163 | -0.095 | 0.817769085 |
| chac1            | EV605173 | 0.7    | 0.298914416 |
| scarb1           | EV605191 | -0.588 | 0.146591449 |
| EIF3ha           | EV605274 | 0.128  | 0.81050326  |
| zgc:175195       | EV605299 | -0.169 | 0.640896484 |



|                   |              |          |             |             |
|-------------------|--------------|----------|-------------|-------------|
| zgc:63942         | EV605340     | -0.405   | 0.375622565 |             |
| zgc:175136        | EV605351     | -0.68    | 0.051847576 |             |
| otul              | EV605370     | 0.523    | 0.053657952 |             |
| hnrnpab           | EV605399     | 0.252    | 0.772101766 |             |
| LOC100002545      | EV605409     | -0.233   | 0.649238376 |             |
| NA                | EV605447     | -0.825   | 0.009321902 |             |
| larp6             | EV605473     | -0.335   | 0.397433353 |             |
| spsb1             | EV605552     | -0.158   | 0.725107133 |             |
| LOC792922         | EV605606     | -0.515   | 0.090696476 |             |
| si:ch211-67e16.9  | EV605727     | -0.475   | 0.399491266 |             |
| LOC100149910      | EV605793     | -0.234   | 0.817895688 |             |
| mcmbp             | EV605854     | -0.425   | 0.064984996 |             |
| bcl6a             | EV605893     | -0.247   | 0.494887428 |             |
| NA                | EV605952     | -0.479   | 0.087786654 |             |
| NA                | EV605955     | 0.372    | 0.462413668 |             |
| si:ch211-250e5.16 | EV605962     | -1.102   | 0.120018858 |             |
| slc25a26          | EV606036     | -0.024   | 0.977562608 |             |
| snx10a            | EV606056     | -0.663   | 0.040870301 |             |
| NA                | EV606064     | 0.186    | 0.709938165 |             |
| NA                | EV606131     | 0.176    | 0.580338413 |             |
| NA                | EV606142     | 0.685    | 0.100630447 |             |
| zgc:92139         | EV606145     | -0.464   | 0.189123671 |             |
| uqerc2a           | EV606155     | 0.54     | 0.023293105 |             |
| NA                | EV606168     | 0.649    | 0.441068548 |             |
| LOC100334275      | EV606173     | -0.791   | 0.081388793 |             |
| tatdn2            | EV606199     | -0.475   | 0.128421887 |             |
| mrpl9             | EV606218     | -0.296   | 0.268942961 |             |
| zgc:154067        | EV606251     | -0.492   | 0.049055837 |             |
| <hr/>             |              |          |             |             |
| G                 | im:6902407   | CO349727 | -1.228      | 0.001837468 |
|                   | LOC100535211 | CO349744 | -1.76       | 3.11576E-05 |
|                   | rdh14a       | CO349746 | -1.735      | 0.00285807  |
|                   | zgc:112142   | CO349767 | -1.616      | 0.028795283 |
|                   | NA           | CO349791 | -1.121      | 0.047676211 |
|                   | zgc:114188   | CO349795 | 1.064       | 0.024168706 |
|                   | gtf3ab       | CO349799 | -1.042      | 0.029877066 |
|                   | LOC100331830 | CO349851 | -1.347      | 0.018572174 |
|                   | zgc:56388    | CO349862 | -1.117      | 0.025884022 |
|                   | zgc:56699    | CO349866 | -1.304      | 0.032214961 |
|                   | ctssb.1      | CO349869 | -1.155      | 0.013426887 |
|                   | hmgbl1a      | CO349874 | -1.316      | 0.044424241 |
|                   | LOC100331917 | CO349911 | -1.608      | 7.99033E-05 |
|                   | NA           | CO349912 | -1.684      | 0.002067018 |
|                   | snrpb        | CO349925 | -1.091      | 0.006692382 |

|                  |          |        |             |
|------------------|----------|--------|-------------|
| NA               | CO349981 | 1.373  | 0.014343695 |
| zgc:92018        | CO349992 | -1.179 | 0.001910864 |
| si:ch73-90k17.1  | CO349995 | -1.081 | 0.002471825 |
| si:dkey-58f10.14 | CO350023 | -1.722 | 0.004859255 |
| lrrc57           | CO350037 | -1.253 | 0.03752232  |
| LOC100535939     | CO350072 | 1.103  | 0.002490988 |
| LOC100537182     | CO350080 | -1.295 | 0.002471825 |
| zgc:171818       | CO350113 | -1.176 | 0.030528923 |
| aplp             | CO350199 | 1.995  | 0.015228357 |
| LOC407678        | CO350203 | -1.147 | 0.011593716 |
| LOC100007645     | CO350218 | -1.715 | 0.004850423 |
| sinup            | CO350225 | -1.541 | 0.007775821 |
| LOC100331690     | CO350303 | -1.379 | 0.016019992 |
| midlip1          | CO350377 | -1.259 | 0.002490988 |
| cldng            | CO350381 | -1.587 | 0.010729935 |
| NA               | CO350393 | -1.051 | 0.001841541 |
| txndc5           | CO350395 | -1.356 | 0.001439871 |
| zgc:111868       | CO350423 | -1.271 | 0.027144448 |
| si:ch211-14a17.7 | CO350473 | -1.313 | 0.036195613 |
| NA               | CO350488 | 1.001  | 0.006636586 |
| wu:fd16d01       | CO350516 | -1.131 | 0.041190103 |
| zgc:55413        | CO350518 | -1.68  | 0.000223198 |
| ckbb             | CO350519 | -1.081 | 0.010825455 |
| sf3b5            | CO350541 | -1.021 | 0.006692382 |
| exosc5           | CO350582 | -1.099 | 0.002546619 |
| LOC100535366     | CO350609 | -1.098 | 0.024554745 |
| zgc:175135       | CO350634 | -1.197 | 0.012584425 |
| si:dkey-167i21.2 | CO350650 | -1.583 | 0.001841541 |
| LOC100332229     | CO350723 | -1.311 | 0.002976256 |
| ap1s2            | CO350755 | -1.371 | 0.018997573 |
| LOC795535        | CO350772 | -1.026 | 0.041990515 |
| cebpb            | CO352647 | 1.055  | 0.004001054 |
| wu:fj04c06       | CO352656 | 1.148  | 0.007123739 |
| ccdc113          | CO352679 | 1.58   | 0.001841541 |
| ctsba            | CO352714 | -1.217 | 0.027354324 |
| LOC100334248     | CO352742 | 1.3    | 0.000953499 |
| cdc25            | CO352749 | -1.094 | 0.002471825 |
| fam65a           | CO352776 | 1.178  | 0.001739962 |
| cd63             | CO352872 | 1.423  | 0.008271237 |
| stat1a           | CO352930 | 1.568  | 0.000197531 |
| krt8             | CO353051 | 1.493  | 0.007215326 |
| cel.1            | CO353105 | 1.21   | 0.011363754 |
| NA               | CO353196 | 2.952  | 9.53114E-07 |

|              |          |        |             |
|--------------|----------|--------|-------------|
| NA           | CO353223 | 1.905  | 0.001841541 |
| gpx1a        | CO353334 | 1.658  | 0.029727924 |
| cdk2ap2      | CO353359 | -1.212 | 5.69379E-05 |
| NA           | CO353420 | 1.117  | 0.043355572 |
| NA           | CO353527 | 3.316  | 0.000273361 |
| NA           | CO353541 | 1.53   | 0.012562153 |
| foxo3a       | CO353645 | 1.028  | 0.008428862 |
| NA           | CO353646 | 1.188  | 0.002038716 |
| acta2        | CO353886 | 1.987  | 0.015419084 |
| abca1a       | CO353918 | 1.261  | 0.006030172 |
| LOC100151188 | CO353922 | 1.592  | 0.004354687 |
| zgc:77734    | CO353938 | 1.613  | 0.001531141 |
| NA           | CO353946 | 3.131  | 0.028079084 |
| NA           | CO353992 | 1.196  | 0.017595151 |
| LOC100329375 | CO354019 | 1.77   | 0.017834698 |
| im:7139388   | CO354135 | 1.095  | 0.043395667 |
| cldnd        | CO350971 | -1.346 | 0.006778178 |
| zgc:173544   | CO350986 | -1.339 | 0.006203748 |
| rtn1a        | CO350996 | 1.519  | 0.001841541 |
| zp2.6        | CO351043 | -1.214 | 0.030528923 |
| zgc:174237   | CO351100 | -1.162 | 0.011335814 |
| mfge8b       | CO351243 | -1.265 | 0.000352519 |
| zgc:63694    | CO351246 | -1.108 | 0.001794961 |
| zgc:195245   | CO351264 | -1.304 | 0.000420751 |
| bactin2      | CO353568 | -1.183 | 0.040870301 |
| zgc:171818   | CO351310 | -1.089 | 0.014767567 |
| zp3b         | CO351366 | -1.109 | 0.007674523 |
| NA           | CO351390 | 1.063  | 0.011579132 |
| zgc:112356   | CO351391 | -1.163 | 0.002067018 |
| btg1         | CO351489 | 2.191  | 4.46753E-05 |
| NA           | CO351516 | 1.219  | 9.53571E-05 |
| ccne         | CO351539 | -1.108 | 0.001136828 |
| ccna2        | CO354180 | -1.179 | 0.000872425 |
| map1lc3b     | CO354294 | 1.13   | 0.000265805 |
| ppp1cbl      | CO354301 | 1.081  | 0.002819764 |
| NA           | CO354323 | 1.295  | 0.000301827 |
| NA           | CO354422 | 1.511  | 0.005969547 |
| colla1b      | CO354495 | 2.373  | 0.000820112 |
| zgc:153629   | CO354594 | 1.315  | 0.043395667 |
| hbaa1        | CO354643 | 3.449  | 0.001138593 |
| lpl          | CO354672 | 2.076  | 0.003485418 |
| LOC556700    | CO354706 | 1.333  | 0.012109478 |
| LOC100538148 | CO354825 | 1.004  | 0.018042145 |

|                  |          |        |             |
|------------------|----------|--------|-------------|
| atf4b1           | CO355031 | -1.201 | 0.009195541 |
| sparc            | CO355062 | 2.445  | 0.004586127 |
| scp2a            | CO355087 | 2.927  | 0.000308528 |
| ccl25b           | CO355088 | 1.567  | 0.021110347 |
| tob1b            | CO355844 | 1.221  | 0.003095885 |
| si:dkey-71p21.9  | CO356152 | 1.089  | 0.008949481 |
| LOC795192        | CO355472 | 2.243  | 0.010034859 |
| hsd11b2          | CO356253 | 1.252  | 0.000309079 |
| LOC100537859     | CO356303 | 2.215  | 0.001694023 |
| zgc:64161        | CO356342 | 1.398  | 0.010777508 |
| zgc:171719       | EV854711 | 1.878  | 0.000122618 |
| nr1h5            | EV562770 | 1.054  | 0.019281195 |
| arpc1b           | EV562855 | 1.531  | 0.00239523  |
| dhrr9            | EV562872 | 1.842  | 0.034496457 |
| cebpd            | EV563016 | 1.879  | 0.002805133 |
| NA               | EV563027 | 1.457  | 0.04583335  |
| calua            | EV563240 | 1.188  | 0.010424413 |
| LOC100538311     | EV563252 | 1.149  | 0.008428862 |
| dpp7             | EV563341 | 1.163  | 0.002551444 |
| LOC100535949     | EV563350 | 1.758  | 0.011430881 |
| LOC100000294     | EV563564 | 3.365  | 7.34747E-07 |
| etnk1            | EV563627 | 2.09   | 0.002466041 |
| NA               | EV564124 | 1.128  | 0.001362921 |
| LOC555163        | EV564157 | 1.03   | 0.011421813 |
| tm7sf2           | EV564219 | 1.235  | 0.034496457 |
| slc25a36a        | EV564246 | 1.907  | 0.001841541 |
| zgc:112315       | EV565098 | 1.195  | 0.004383399 |
| ddx41            | CO350632 | -1.039 | 0.000490033 |
| tsc22d3          | EV854578 | 1.573  | 0.001983406 |
| NA               | CO353374 | 1.279  | 0.006862933 |
| zgc:123269       | CO353376 | 1.422  | 0.001984727 |
| mkrn4            | CO353771 | -1.004 | 0.014217355 |
| ces2             | CO354240 | 3.31   | 0.003925692 |
| pck2             | EV555265 | 1.339  | 0.048018561 |
| zgc:92066        | EV555399 | -1.084 | 0.005185919 |
| LOC561790        | EV555409 | 2.746  | 0.005291745 |
| tbeta-a          | EV555485 | 1.276  | 0.016582791 |
| zgc:73142        | EV555530 | 1.295  | 0.021876815 |
| gmnn             | EV555666 | -1.295 | 0.001138593 |
| LOC100538113     | EV555710 | 1.318  | 0.018782087 |
| zgc:152986       | EV556284 | -1.076 | 0.026840073 |
| si:ch211-203b8.5 | EV556608 | 1.513  | 0.032704878 |
| fli1b            | EV557134 | -1.967 | 0.003877477 |

|                 |          |        |             |
|-----------------|----------|--------|-------------|
| NA              | EV557152 | 1.097  | 0.003877477 |
| NA              | EV557155 | -1.071 | 0.002556233 |
| si:dkey-90l23.1 | EV557304 | -1.631 | 1.43177E-05 |
| NA              | EV557618 | 1.115  | 0.002067018 |
| coll1a2         | EV557996 | 3.081  | 0.000745387 |
| LOC407698       | EV558016 | 2.3    | 0.001409205 |
| LOC100535213    | EV558133 | -1.324 | 0.000171492 |
| hbbe2           | EV558198 | 2.701  | 0.004056669 |
| LOC100006925    | EV558235 | 2.271  | 0.034496457 |
| cyc1            | EV558255 | -1.397 | 0.007975572 |
| NA              | EV558325 | -1.486 | 0.009941598 |
| wu:fi42e03      | EV558866 | -1.352 | 0.00068158  |
| ctbp1           | EV559237 | -1.216 | 0.015367849 |
| fabp3           | EV559759 | 2.034  | 0.005814653 |
| NA              | EV559887 | -1.118 | 0.00529216  |
| LOC792919       | EV560017 | -1.009 | 0.040024846 |
| lamp2           | EV560047 | -1.333 | 0.000820112 |
| prtfdc1         | EV560150 | -1.447 | 0.000704515 |
| stau2           | EV560230 | -1.518 | 0.007990974 |
| zgc:171779      | EV560504 | -1.055 | 0.008734942 |
| acaa2           | EV560564 | 1.112  | 0.002838441 |
| pdccl1          | EV560657 | 1.651  | 0.01062382  |
| nsa2            | EV560860 | 1.107  | 0.000832309 |
| NA              | EV561415 | -1.195 | 0.000272561 |
| nsa2            | EV603076 | 1.047  | 0.002490988 |
| LOC795984       | EV603237 | -1.714 | 0.006170514 |
| fbxo22          | EV603344 | -1.233 | 0.008770569 |
| cdca9           | EV603649 | -1.11  | 0.00231684  |
| NA              | EV603839 | -1.788 | 0.013906186 |
| rbp4            | EV604348 | 2.066  | 0.001138593 |
| zgc:101768      | EV604939 | -1.027 | 0.003652899 |
| LOC100333730    | EV605366 | -1.057 | 0.001354066 |
| NA              | EV606109 | -1.234 | 0.014377691 |

\*Gene symbol information for these EST sequences were obtained based on sequence similarity to other vertebrates.

†The q-value represents the false discovery rate corrected p-value derived from the linear fit to a group means parameterization. Fold change values between the high and control female groups (H vs. CF) have been log<sub>2</sub> transformed. Supplementary Figure 3 provides the key to the different sections.
